# Supplementary material for: Electroacupuncture for treating insomnia in patients with cancer: a study protocol for a randomised pilot clinical trial
Source: PubMed Central journal article supplement — BMJ Open. 2017 Aug 11;7(8):e016269. doi: 10.1136/bmjopen-2017-016269 (PMC5629657; doi:10.1136/bmjopen-2017-016269), 2017-08-11
Supplement: bmjopen-2017-016269.draft_revisions.pdf [file bmjopen-2017-016269.draft_revisions.pdf]

# BMJ Open

## Electroacupuncture for treating insomnia in cancer patients: a study protocol for a randomised pilot clinical trial

|                                 |                                                                                                                                                                                                                                                                                                                                                                                                                                                                                                                                                                                                                                                                                                                                                                                    |
|---------------------------------|------------------------------------------------------------------------------------------------------------------------------------------------------------------------------------------------------------------------------------------------------------------------------------------------------------------------------------------------------------------------------------------------------------------------------------------------------------------------------------------------------------------------------------------------------------------------------------------------------------------------------------------------------------------------------------------------------------------------------------------------------------------------------------|
| Journal:                        | <i>BMJ Open</i>                                                                                                                                                                                                                                                                                                                                                                                                                                                                                                                                                                                                                                                                                                                                                                    |
| Manuscript ID                   | bmjopen-2017-016269                                                                                                                                                                                                                                                                                                                                                                                                                                                                                                                                                                                                                                                                                                                                                                |
| Article Type:                   | Protocol                                                                                                                                                                                                                                                                                                                                                                                                                                                                                                                                                                                                                                                                                                                                                                           |
| Date Submitted by the Author:   | 03-Feb-2017                                                                                                                                                                                                                                                                                                                                                                                                                                                                                                                                                                                                                                                                                                                                                                        |
| Complete List of Authors:       | Kim, Mikyung; Korea Institute of Oriental Medicine, Clinical Research Division<br>Kim, Jung Eun; Korea Institute of Oriental Medicine<br>Lee, Hye-Yoon ; Korea Institute of Oriental Medicine, Clinical Research Division<br>Kim, Ae-Ran ; Korea Institute of Oriental Medicine, Clinical Research Division<br>Park, Hyo-Ju; Korea Institute of Oriental Medicine, Clinical Research Division<br>Kwon, O-Jin; Korea Institute of Oriental Medicine, Clinical Research Division<br>Kim, Bo-Kyung ; Dong-eui University, Department of Neuropsychiatry, College of Oriental Medicine<br>Cho, Jung Hyo; Daejeon University, Department of Internal Medicine, College of Traditional Korean Medicine<br>Kim, Joo-Hee; Korea Institute of Oriental Medicine, Clinical Research Division |
| <b>Primary Subject Heading</b>: | Complementary medicine                                                                                                                                                                                                                                                                                                                                                                                                                                                                                                                                                                                                                                                                                                                                                             |
| Secondary Subject Heading:      | Mental health, Oncology                                                                                                                                                                                                                                                                                                                                                                                                                                                                                                                                                                                                                                                                                                                                                            |
| Keywords:                       | insomnia, sleep disturbance, cancer, electroacupuncture, randomised controlled trial                                                                                                                                                                                                                                                                                                                                                                                                                                                                                                                                                                                                                                                                                               |
|                                 |                                                                                                                                                                                                                                                                                                                                                                                                                                                                                                                                                                                                                                                                                                                                                                                    |

SCHOLARONE™  
Manuscripts

# Electroacupuncture for treating insomnia in cancer patients: a study protocol for a randomised pilot clinical trial

Mikyung Kim<sup>1</sup>, Jung-Eun Kim<sup>1</sup>, Hye-Yoon Lee<sup>1</sup>, Ae-Ran Kim<sup>1</sup>, Hyo-Ju Park<sup>1</sup>, O-Jin Kwon<sup>1</sup>, Bo-Kyong Kim<sup>2</sup>, Jung Hyo Cho<sup>3</sup>, Joo-Hee Kim<sup>1\*</sup>

<sup>1</sup> Clinical Research Division, Korea Institute of Oriental Medicine, Daejeon, Republic of Korea

<sup>2</sup> Department of Neuropsychiatry, College of Oriental Medicine, Dong-eui University, Busan, Republic of Korea

<sup>3</sup> Department of Internal Medicine, College of Traditional Korean Medicine, Daejeon University, Daejeon, Republic of Korea

Mikyung Kim: [01mkkim@gmail.com](mailto:01mkkim@gmail.com)

Jung-Eun Kim: [eujuki@kiom.re.kr](mailto:eujuki@kiom.re.kr)

Hye-Yoon Lee: [hyouun@kiom.re.kr](mailto:hyouun@kiom.re.kr)

Ae-Ran Kim: [arkim@kiom.re.kr](mailto:arkim@kiom.re.kr)

Hyo-Ju Park: [mable@kiom.re.kr](mailto:mable@kiom.re.kr)

O-Jin Kwon: [cheda1334@kiom.re.kr](mailto:cheda1334@kiom.re.kr)

Bo-Kyong Kim: [npjolie@hanmail.net](mailto:npjolie@hanmail.net);

Jung Hyo Cho: [choajoa@dju.kr](mailto:choajoa@dju.kr)

Joo-Hee Kim: [jhkim714v@gmail.com](mailto:jhkim714v@gmail.com)

1  
2  
3  
4 \* Correspondence to: Dr Joo-Hee Kim; [jhkim714v@gmail.com](mailto:jhkim714v@gmail.com)  
5

6 - Postal address: 1672 Yuseongdae-ro, Yuseong-gu, Daejeon (34054), Republic of Korea  
7

8 - Telephone number: 82-42-223-4052  
9

10  
11  
12 A full list of author information is available at the end of the article  
13

- 14  
15  
16 ● Word count 5,505 (excluding title page, abstract, references, figures and tables)  
17  
18  
19  
20  
21  
22  
23  
24  
25  
26  
27  
28  
29  
30  
31  
32  
33  
34  
35  
36  
37  
38  
39  
40  
41  
42  
43  
44  
45  
46  
47  
48  
49  
50  
51  
52  
53  
54  
55  
56  
57  
58  
59  
60

## Abstract

**Introduction:** Although insomnia is one of the most prevalent and disturbing symptoms among cancer patients, it has not been properly managed. Electroacupuncture (EA) has received attention as a promising intervention for insomnia, and a few previous studies have reported that this intervention may be beneficial for treating insomnia in cancer patients. The aim of this study is to explore the safety and therapeutic effect of EA on the sleep disturbance of cancer patients with insomnia using a subjective method, patient-reported questionnaires and an objective tool, actigraphy to measure the quality of sleep.

**Methods and analysis:** This is a study protocol for a randomised, three-arm, multi-centre, pilot clinical trial. A total of 45 cancer patients who have continuous insomnia related to cancer treatment or cancer itself will be randomly allocated to an EA group, sham EA group, or usual care group in equal proportions. The EA group will receive 10 sessions of EA treatment over 4 weeks. The sham EA group will receive sham EA at non-acupoints using nonpenetrating Streitberger placebo acupuncture needles with mock EA. The usual care group will not receive EA treatment. All participants will be provided a brochure on the management of sleep disorders regardless of their group assignment. The primary outcome measure is the mean change in the insomnia severity index from the baseline to week 5. Information related to sleep quality will also be obtained through the Pittsburgh sleep quality index, a sleep diary, and actigraphy. Participants will complete the trial by visiting the research centre at week 9 for follow-up assessment.

**Ethics and dissemination:** This study protocol was approved by the institutional review boards of each research centres. Written informed consent will be obtained from all participants. The result of this study will be published in peer-reviewed journals or presented at academic conferences.

**Trial registration number:** Clinical Research Information Service KCT0002162.

## Strengths and limitations of this study

1. This randomised, multi-centre, clinical trial is the first study in South Korea exploring the effect and safety of electroacupuncture on the sleep disturbance of cancer patients suffering from insomnia.
2. The study will use actigraphy to acquire objective outcomes reflecting the quality of sleep as well as the patient-reported outcomes.
3. The study will measure the level of cortisol and melatonin in saliva as biomarkers reflecting the circadian rhythm of the body related to sleep and arousal.
4. Polysomnography needs to be included in future research to investigate the sleep architecture and the cause of sleep disorders in various ways.
5. Because of the unique nature of electroacupuncture and the design of this study including a usual care group, it is impossible to completely blind the practitioners and all participants.
6. The study adopts a nonpenetrating placebo needling at non-acupoints as a placebo comparator for acupuncture, however, a perfect placebo intervention for real acupuncture that has no physiologic effects while maintaining patient blinding has not been developed yet.

## INTRODUCTION

Insomnia is one of the most common afflictions among the general population, and the prevalence of insomnia is known to be twice as high as in cancer patients compared to healthy adults.<sup>1</sup> Complex interactions of various factors such as adverse reactions to chemotherapy,<sup>1</sup> circadian disruption,<sup>2</sup> inflammation,<sup>3</sup> and tumour growth<sup>3</sup> seem to be the reasons why cancer patients are especially susceptible to insomnia. Insomnia has a profound effect on the overall quality of life,<sup>4</sup> energy,<sup>5</sup> emotion,<sup>6</sup> memory,<sup>7</sup> and immune system<sup>8</sup> of cancer patients. In addition, insomnia is also known to be associated with decreased survival<sup>9</sup> and tumour worsening.<sup>10</sup> Although insomnia is such a common and important problem among cancer patients, it is not easily cured or well managed.<sup>1 11</sup>

The most commonly used therapy for the management of insomnia in cancer patients is pharmacotherapy.<sup>12</sup> According to Moore et al., approximately half of breast cancer patients are prescribed sleeping pills.<sup>13</sup> Long-term use of sleeping pills is known to be associated with continued sleep disturbance, decreased ability to perform daily activities, memory impairment, traffic accidents, falls, etc.<sup>12</sup> Thus, pharmacotherapy should be used only for a short-term period; however, approximately 30% of cancer patients are receiving sleeping pills even one year after the end of chemotherapy.<sup>13</sup>

In addition to pharmacotherapy, cognitive behavioural therapy has been recommended as a standard therapy for the improvement of insomnia.<sup>3</sup> However, there are some limitations to this therapy in that the compliance rate to the therapy is low because the therapeutic response does not appear immediately, and patient access to the therapy is low due to the high cost of the therapy.<sup>14</sup> Moreover, experienced therapists are rare, and the effect of therapy varies widely depending on the proficiency of the therapist.<sup>14</sup>

For this reason, there is a growing demand for complementary alternative medicine (CAM) in the field of sleep management. Acupuncture is one of the most commonly used therapeutic interventions in CAM. Acupuncture is a treatment that punctures and stimulates the skin at acupoints using acupuncture needles. Electroacupuncture (EA) refers to a method that supplies a constant physical stimulus to acupoints through the inserted acupuncture needle connected to a microcurrent stimulator.

Previous systematic reviews on the effect of acupuncture for insomnia have revealed that

1  
2  
3  
4 acupuncture is significantly more effective to improve sleep disturbance in insomniacs than  
5 no treatment<sup>15</sup> and sham acupuncture.<sup>15-17</sup> Insomnia has also been reported to be as effective  
6 as pharmacotherapy<sup>15</sup> or even superior to sleeping pills<sup>15,17</sup> and provides additional benefit to  
7 patients who are undergoing pharmacotherapy to improve insomnia.<sup>15,16</sup>  
8  
9

10  
11 The effect of acupuncture for the improvement of sleep disorders has also been identified in  
12 studies targeting cancer patients. A survey conducted at a major cancer centre in the United  
13 States showed that acupuncture significantly improved the quality of sleep in cancer  
14 patients.<sup>18</sup> Garland et al. also determined that 8-week EA was more effective than  
15 pharmacotherapy to attenuate sleep disturbance from a recently published randomised  
16 controlled trial including breast cancer patients suffering from hot flush.<sup>19</sup> Choi et al.  
17 systematically investigated the clinical studies on the effect of acupuncture for insomnia in  
18 cancer patients and indicated that acupuncture may be superior to sham acupuncture or  
19 pharmacotherapy.<sup>20</sup> However, these authors could not draw any firm conclusions because the  
20 level of evidence in the included studies was low overall, the effect size of the studies was too  
21 small to confirm their clinical significance, and there were few studies strictly designed and  
22 performed.<sup>20</sup>  
23  
24  
25  
26  
27  
28  
29  
30

31  
32 Subjective measurement tools such as self-reported questionnaires or sleep diaries are the  
33 most commonly used type of outcome measures for the assessment of sleep quality. This is  
34 because these tools are relatively simple to measure and have the advantage of not interfering  
35 with daily life or sleeping; however, one limitation of this approach is that the results of these  
36 measurements are entirely up to the decisions of participants and are unable to objectively  
37 measure the pattern of sleep.<sup>21</sup> Polysomnography and actigraphy are the two main methods to  
38 objectively measure sleep quality.<sup>21</sup>  
39  
40  
41  
42  
43

44 Polysomnography is a gold standard method for the objective measurement of sleep,<sup>3,21</sup>  
45 because it can demonstrate the sleep structure and the cause of sleep disorders in various  
46 ways including electroencephalogram, electromyogram, electrocardiogram, respiration and  
47 oxygen saturation, etc.<sup>22</sup> However, one disadvantage is that polysomnography requires an  
48 expensive device and an expert capable of interpreting the results.<sup>21</sup>  
49  
50  
51  
52

53 To overcome these shortcomings, actigraphy has been investigated.<sup>23</sup> Actigraphy is a  
54 noninvasive means of measuring the motion of the body using an actigraph, a piezoelectric  
55  
56

1  
2  
3  
4 accelerometer.<sup>23</sup> Actigraphy has been widely used in the field of sleep research because it can  
5 detect sleep, activity, and movement without disturbing the daily lives of the subjects who are  
6 only required to wear a small, watch-shaped device on the wrist.<sup>23</sup> Studies on the similarities  
7 and differences between the sleep quality measured by polysomnography, actigraphy, and  
8 subjective assessment tools have been published.<sup>23</sup> It is recommended to use both objective  
9 and subjective measurement methods to assess sleep quality in the field of sleep research.<sup>24</sup>  
10  
11  
12  
13

14 A few acupuncture researchers have reported the positive effect of acupuncture using  
15 objective measurement tools such as polysomnography<sup>25-27</sup> or actigraphy.<sup>28 29</sup> However, there  
16 remain conflicting results regarding whether acupuncture has the same effect on both  
17 subjective and objective aspects of sleep. Some researchers argued that the effect of  
18 acupuncture was approved via both objective and subjective measurement tools<sup>25-27</sup>, while  
19 others reported that acupuncture seemed to affect the subjective outcomes only, not the result  
20 of polysomnography<sup>30 31</sup> or actigraphy.<sup>32-34</sup>  
21  
22  
23  
24  
25  
26

27 The aim of this study is to explore the therapeutic effect and safety of EA on the sleep  
28 disturbance of cancer patients with insomnia using both subjective questionnaires and  
29 objective actigraphy.  
30  
31  
32  
33  
34  
35  
36  
37  
38  
39  
40  
41  
42  
43  
44  
45  
46  
47  
48  
49  
50  
51  
52  
53  
54  
55  
56  
57  
58  
59  
60



## METHODS AND ANALYSIS

### Study design

This is a study protocol for a randomised, three-arm, multi-centre, pilot clinical trial. Forty-five cancer patients with insomnia will be randomly assigned to an EA group, sham EA group, or usual care group at a 1:1:1 ratio. The schedule of enrolment, interventions, and assessments is summarised in Table 1, and the flow diagram of the study is presented in Figure 1.

**Table 1** Schedule of enrolment, interventions, and assessments

| TIMEPOINT                              | STUDY PERIOD             |                                     |                                                                                |   |        |                                                          |   |
|----------------------------------------|--------------------------|-------------------------------------|--------------------------------------------------------------------------------|---|--------|----------------------------------------------------------|---|
|                                        | Enrolment<br><i>-wk1</i> | Allocation<br><i>wk<sub>0</sub></i> | Treatment<br><i>wk<sub>1</sub></i> <i>wk<sub>3</sub></i> <i>wk<sub>4</sub></i> |   |        | Follow-up<br><i>wk<sub>5</sub></i> <i>wk<sub>9</sub></i> |   |
| <b>ENROLMENT</b>                       |                          |                                     |                                                                                |   |        |                                                          |   |
| Eligibility screen                     | X                        |                                     |                                                                                |   |        |                                                          |   |
| Informed consent                       | X                        |                                     |                                                                                |   |        |                                                          |   |
| Allocation                             |                          | X                                   |                                                                                |   |        |                                                          |   |
| <b>INTERVENTIONS</b>                   |                          |                                     |                                                                                |   |        |                                                          |   |
| EA                                     |                          |                                     | ←————→                                                                         |   |        |                                                          |   |
| Sham EA                                |                          |                                     | ←————→                                                                         |   |        |                                                          |   |
| Usual care                             |                          |                                     | ←————→                                                                         |   |        |                                                          |   |
| <b>ASSESSMENTS</b>                     |                          |                                     |                                                                                |   |        |                                                          |   |
| ISI                                    | X                        | X                                   |                                                                                | X |        | X                                                        | X |
| PSQI                                   |                          | X                                   |                                                                                | X |        | X                                                        | X |
| Sleep diary                            | ←————→                   |                                     | ←————→                                                                         |   |        |                                                          |   |
| Actigraphy                             | ←————→                   |                                     | ←————→                                                                         |   | ←————→ |                                                          |   |
| FACT-F                                 |                          | X                                   |                                                                                |   |        | X                                                        |   |
| MoCA                                   |                          | X                                   |                                                                                |   |        | X                                                        |   |
| BDSS                                   |                          | X                                   |                                                                                |   |        |                                                          |   |
| Salivary hormone test                  |                          | X                                   |                                                                                |   |        | X                                                        |   |
| Blinding/credibility test <sup>a</sup> |                          |                                     | X                                                                              |   | X      |                                                          |   |
| Adverse event                          |                          |                                     | X                                                                              | X | X      | X                                                        | X |

Laboratory test<sup>b</sup> X X

EA, Electroacupuncture; ISI, Insomnia Severity Inventory; PSQI, Pittsburgh Sleep Quality Index; FACT-F, Functional Assessment of Cancer Therapy-Fatigue; MoCA, The Montreal Cognitive Assessment; BDSS, Blood Deficiency Scoring System.

<sup>a</sup>Only EA and sham EA groups will undergo blinding and credibility tests.

<sup>b</sup>The laboratory test includes complete blood count and differential count, absolute neutrophil count, aspartate aminotransferase, alanine aminotransferase, total bilirubin, blood urea nitrogen, creatinine, albumin, erythrocyte sedimentation rate, thyroid-stimulating hormone, free thyroxine, and human chorionic gonadotropin urine test (only for women in their childbearing years at the screening visit).

## Recruitment

Two clinical research centres in South Korea will conduct this trial: Daejeon Oriental Hospital of Daejeon University and Dong-eui University Korean Medical Hospital in Busan. We will do our best to secure enough participants in this study using online and offline advertisement boards inside and outside the hospitals and by releasing flyers to daily local newspapers.

## Inclusion criteria

1. Patients aged 19 years or over but under 80 years
2. An Eastern Cooperative Oncology Group (ECOG) performance status  $\leq 2$
3. Cessation of cancer-related treatments (e.g., surgery, radiotherapy, chemotherapy, immunotherapy) at least 12 weeks before the trial (ongoing hormone therapy, which must have been initiated at least 3 weeks prior to enrolment, is allowed)
4. Continuous insomnia related to cancer treatment or cancer itself for at least 3 months, with fulfilment of The Diagnostic and Statistical Manual of Mental Disorders, Fifth Edition (DSM-5) diagnostic criteria for insomnia disorder
5. Total score in the Insomnia Severity Index (ISI)  $\geq 15$  points

1  
2  
3  
4 6. Willingness to participate in the trial and having provided written consent  
5  
6  
7

## 8 **Exclusion criteria**

- 9  
10  
11 1. Having experienced the current level of sleep disorder prior to the diagnosis of cancer  
12  
13 2. Severe anaemia (platelet count < 60,000/ $\mu$ L, haemoglobin < 8 g/dL, or absolute neutrophil  
14 count < 1,000/ $\mu$ L)  
15  
16 3. A diagnosis of major depressive disorder, anxiety disorder, panic disorder, or other  
17 psychiatric disorder; caffeine, alcohol, or drug addiction; or a subscale of either anxiety or  
18 depression in Hamilton Anxiety and Depression Scale (HADS) score  $\geq$  11 points  
19  
20 4. Level of cancer pain measured by the numeric rating scale  $\geq$  4  
21  
22 5. An estimated life expectancy of six months or less  
23  
24 6. A plan for surgery, chemotherapy, or radiotherapy during the study  
25  
26 7. A recent change of regular medication to alleviate insomnia within 4 weeks of the  
27 beginning of the trial  
28  
29 8. Having taken sleeping pills as required within 2 weeks of the beginning of the trial  
30  
31 9. Having undergone Korean medical treatment (e.g., acupuncture, moxibustion, cupping,  
32 herbal medicine) within 4 weeks of the beginning of the trial  
33  
34 10. Initiation or a change in dietary supplement regimen or non-pharmacologic therapies (e.g.,  
35 cognitive behavioural therapy, exercise, etc.) for alleviating insomnia during the trial or  
36 within 4 weeks of the beginning of the trial  
37  
38 11. Working shifts or changes in day/night work schedule that could impact circadian rhythm  
39  
40 12. Suffering from pain severe enough to cause sleep disturbance or presence of any disease  
41 that could cause insomnia  
42  
43 13. Taking haemostatic agents (e.g., Greenmono, Advate, Monoclate-P, Facnyne, BeneFix)  
44 because of haemostatic disorders  
45  
46  
47  
48  
49  
50  
51  
52  
53  
54  
55  
56  
57  
58  
59  
60

1  
2  
3  
4 14. Abnormal findings in thyroid function test (abnormal level of free thyroxine [free T4] and  
5 thyroid stimulating hormone [TSH] < 0.1 uIU/ml or TSH > 5.1 uIU/ml)  
6

7  
8 15. History of hypersensitivity reactions to acupuncture or inability to cooperate with  
9 acupuncture therapy  
10

11 16. The presence of implants that could interfere with EA or a history of hypersensitivity  
12 reactions to electrostimulation  
13

14 17. Pregnancy, lactation, or planning to become pregnant  
15

16 18. Having participated in other clinical trials within 4 weeks of the beginning of the trial  
17

18 19. Difficulty complying with the study protocol  
19  
20  
21  
22  
23  
24  
25  
26  
27

## 28 **Randomisation and allocation concealment**

29 Fifteen subjects will be allocated to each group according to a randomisation schedule  
30 generated by an independent statistician using SAS (Version 9.4, SAS institute Inc., Cary,  
31 NC). A stratified randomisation method will be used with the research centre and the standard  
32 therapies for insomnia (regular sleep medications or cognitive behavioural therapy for  
33 insomnia) as stratification factors. The statistician will seal the randomisation codes in  
34 sequentially numbered opaque envelopes and send them to the research centres. These  
35 envelopes will be kept in double-locked cabinets at the centres. Each envelope will be opened  
36 by a practitioner to assign the participant to one of the three groups after acquiring informed  
37 consent and eligibility screening.  
38  
39  
40  
41  
42  
43  
44  
45  
46  
47  
48  
49

## 50 **Blinding**

51 Participant blinding will be limited to the participants in the EA and sham EA groups.  
52 Complete participant blinding is not possible because the subjects in the usual care group  
53  
54  
55  
56  
57  
58  
59  
60

cannot help but notice their allocated group. Practitioner blinding cannot be achieved because of the unique nature of EA treatment. The assessor blinding will be maintained by separating the staff members who perform EA and who measure the outcomes.

## Interventions

All participants of this trial will be educated with a brochure on the management of sleep disorders regardless of the assigned groups.

### EA group

Participants in the EA group will receive acupuncture treatment at GV20, EX-HN3, bilateral HT7, PC6, BL63, and KI4 using sterilised stainless steel acupuncture needles (Asiamed GmbH & Co., 0.25 × 25 mm) (Figure 2). In addition to these 10 acupoints, up to 4 more points can be optionally added according to the symptoms of the patients. If participants with lymphatic oedema refuse to be treated with the acupoints on the affected site, the acupoints near the oedema site can be omitted. After inducing *deqi* by twisting the acupuncture needles, electric stimulation using an EA device (ES-160, Ito Co Ltd, Tokyo, Japan) will be applied with a 4-Hz frequency, at an intensity that the participant can notice but feel comfortable with. The EA treatment will be performed for 30 min per time, with a total of 10 times over 4 weeks. Details of the EA treatment based on the standards for reporting interventions in clinical trials of the acupuncture checklist are tabulated in Supplementary File 1.

### Sham EA group

Participants in the sham EA group will receive sham acupuncture using nonpenetrating Streitberger placebo acupuncture needles (Asiamed GmbH & Co.). Unlike the real acupuncture needle that is inserted into the skin, the tip of the Streitberger placebo acupuncture needle is so blunt that it cannot penetrate the skin. The needles will be fixed by medical skin tape on the skin at non-acupoints unrelated to the management of sleep disorders in Korean traditional medicine as follows: upper limb 1 (1 cm lateral and 5 cm

1  
2  
3  
4 proximal points from cubital creases of bilateral arms); upper limb 2 (2 cm above the upper  
5 limb 1 point); lower limb 1 (1.5 cm above the depression at the midpoint of the upper border  
6 of the bilateral patella); lower limb 2 (area 1/3 above the medial part of the bilateral tibia);  
7 and lower limb 3 (1.5 cm above the lower limb 2 point). The same EA device will be applied  
8 to the placebo needles, with an identical beeping sound and light signals as for the EA group.  
9 However, the electric current will not be delivered.  
10  
11  
12  
13

### 14 **Usual care group**

15  
16  
17 Participants in the usual care group will not receive EA treatment. These subjects will  
18 maintain the usual treatment and self-care but cannot begin any additional treatment to  
19 improve their insomnia during the study period.  
20  
21  
22  
23  
24  
25  
26  
27

### 28 **Prohibited and permitted concomitant treatment**

29  
30  
31 The participants will be prohibited from any Korean traditional medical treatment such as  
32 acupuncture, moxibustion, cupping, or herbal drugs to attenuate their insomnia symptoms  
33 except for the EA provided by the trial. If the participants remained on regular medication to  
34 improve insomnia at least 4 weeks prior to the beginning of the trial, they will be allowed to  
35 maintain the medication. However, if the type or dosage of the sleeping pill is changed during  
36 the trial, the subjects will be withdrawn from the study. If the subjects are receiving standard  
37 nonpharmacological treatment, such as cognitive behavioural therapy, or taking any dietary  
38 supplements to attenuate insomnia from at least 4 weeks prior to the beginning of the trial,  
39 they will be allowed to maintain these treatments. However, their regimens cannot be  
40 changed during the trial.  
41  
42  
43  
44  
45  
46  
47

48 The participants will be trained to report all treatments newly received after the beginning of  
49 the trial to the staff members, and their treatment history will be recorded on the case report  
50 form (CRF). When participants are found to have received a prohibited treatment during the  
51 study period, they will be withdrawn from the trial.  
52  
53  
54  
55  
56  
57  
58  
59  
60

## Outcomes

### Primary outcome measure

The primary outcome measure of this study will be the mean change in the ISI from the baseline to the end of the 4-week intervention. The ISI is a 7-item questionnaire devised to diagnose and assess the severity of the insomnia. The total score of the ISI ranges from 0 to 28 points, and it can categorise insomniacs according to scores of 0–7 (no clinically significant insomnia), 8–14 (subthreshold insomnia), 15–21 (clinical insomnia, moderate severity), and 22–28 (clinical insomnia, severe).<sup>35</sup>

### Secondary outcome measures

The secondary outcome measures of this study will include the mean changes in the total score of the ISI from baseline to week 3 and week 9 and changes in the scores of the Pittsburgh Sleep Quality Index (PSQI), Functional Assessment of Cancer Therapy-Fatigue (FACT-F), and Montreal Cognitive Assessment (MoCA); the level of the salivary hormones including cortisol and melatonin; and the quality of sleep measured by a sleep diary and actigraphy before and after the intervention.

The PSQI is a self-reported questionnaire to assess the quality of sleep over the past month. This scale comprises of 7 components including subjective sleep quality, sleep latency, sleep duration, sleep efficiency, sleep disturbances, use of sleeping pills, and daytime dysfunction. The global PSQI score ranges from 0 to 21, and a higher score represents poorer quality of sleep.<sup>36</sup> The change of the global score in the PSQI will be assessed at baseline, week 3, week 5, and week 9.

The FACT-F is a questionnaire devised to determine the level of fatigue of cancer patients. This instrument consists of 40 items in 5 domains including physical well-being, social/family well-being, emotional well-being, functional well-being, and fatigue. The total score of the FACT-F ranges from 0 to 160, where higher points denote a higher level of fatigue that disturbs the daily life of the patients.<sup>37</sup> This score will be assessed at baseline and week 5.

1  
2  
3  
4 The MoCA is a one-page 30-point test originally devised to screen mild cognitive impairment  
5 in the geriatric population and can also be applied to evaluate the level of cognition of cancer  
6 survivors.<sup>38</sup> The MoCA will be assessed at baseline and week 5 by the assessors who will be  
7 blinded to the group allocation.  
8  
9

10  
11 The change in the level of cortisol and melatonin in saliva will be measured before and after  
12 the intervention. These levels are known to reflect the circadian rhythm of the human body.  
13 The level of cortisol usually surges in the morning, while melatonin release increases at night  
14 in normal conditions, and the constant change of these hormones is known to be closely  
15 related to arousal and sleep.<sup>39 40</sup> We will check whether this type of rhythmical change in  
16 these hormones differs before and after the intervention.  
17  
18  
19  
20

21  
22 To understand the details of the sleep status of the participants, a sleep diary will be provided  
23 to each participant. The subjects will be educated to write down their bedtime, final  
24 awakening time, sleep latency, number and duration of awakenings, perceived sleep duration,  
25 midday nap, and use of sleeping pills throughout the study period.<sup>41</sup>  
26  
27  
28

29  
30 To objectively measure the sleep patterns of the participants, actigraphy will be used in this  
31 trial. The candidate participants will wear a watch-type, physical activity monitoring device  
32 (ActiGraph<sup>TM</sup> wGT3X-BT, MTI Health Services Company, Pensacola, FL, USA) on their  
33 nondominant wrists for at least one week during the screening period. The subjects who meet  
34 all eligibility criteria will keep wearing the device during the 4 weeks of the intervention  
35 period to record their sleep and activity. Using this method, we can acquire objective data on  
36 the participants' sleep quality including the total time in bed, sleep latency, wake after sleep  
37 onset, total sleep time, and sleep efficiency.<sup>23</sup>  
38  
39  
40  
41  
42

### 43 **Blinding test and credibility test**

44  
45 The participants in the EA and sham EA groups will participate in the blinding test and  
46 credibility test after the first and last treatments. The purpose of these tests is to check  
47 whether the participant blinding was maintained for these groups. The blinding test will ask  
48 the participants which type of acupuncture they think has been received, real EA, sham EA,  
49 or unknown. The credibility test assesses the level of confidence in the treatment they have  
50  
51  
52  
53  
54  
55  
56  
57  
58  
59  
60



1  
2  
3  
4 received. The score of this test ranges from 0 to 6, where a higher score reflects higher  
5 confidence in the treatment.<sup>42</sup>  
6  
7

### 8 **Safety assessment**

9  
10 For the safety assessment, the investigators will ask the participants on each visit if they have  
11 experienced any adverse events (AE). Laboratory tests will also be performed at baseline and  
12 week 5 to detect AEs. This test includes a complete blood count and differential count,  
13 absolute neutrophil count, aspartate aminotransferase, alanine aminotransferase, total  
14 bilirubin, blood urea nitrogen, creatinine, albumin, erythrocyte sedimentation rate, thyroid-  
15 stimulating hormone, free thyroxine, and human chorionic gonadotropin urine tests (only for  
16 women in their childbearing years at the screening visit).  
17  
18  
19  
20  
21

22 The severity of AEs will be primarily assessed according to the National Cancer Institute  
23 Common Terminology Criteria for Adverse Events (NCI-CTCAE) version 4.0.<sup>43</sup> When the  
24 NCI-CTCAE is not applicable, Spilker's three level criteria will be used instead.<sup>44</sup> The type of  
25 AE and its severity will be recorded to the CRF regardless of the relationship with the  
26 intervention provided in this study. The relationship between the treatment and the AE will be  
27 recorded as definitely related, probably related, possibly related, probably not related,  
28 definitely not related, or unknown.  
29  
30  
31  
32  
33  
34

### 35 **Study feasibility outcomes**

36  
37 To see whether a full-scale randomised clinical trial for this issue is feasible, the recruitment  
38 rate and completion rate will be calculated. The overall rate of adherence to the planned  
39 intervention will also be obtained.  
40  
41  
42  
43  
44  
45  
46  
47

### 48 **Data collection and management**

49  
50 Data will be collected after acquiring the signed consent from the participants. The collected  
51 data will be recorded on the CRF by certificated clinical research coordinators. The whole  
52 process of the trial will be regularly monitored to ensure the quality of the trial. Periodic  
53  
54  
55  
56  
57  
58  
59  
60

1  
2  
3  
4 monitoring will confirm that the data in the CRF match the source document and that the  
5 procedures of the recruitment, intervention and assessment follow the protocol.  
6  
7

8 To guarantee the consistency of the procedures of the intervention and assessment between  
9 research centres, a standard operating procedure will be set and provided to the investigators.  
10 The practitioners are limited to licensed doctors of Korean medicine who have at least 2 years  
11 of clinical experience, and all investigators are required to take training courses for good  
12 clinical practice.  
13  
14  
15  
16  
17  
18  
19  
20  
21

## 22 **Sample size**

23  
24 The purpose of this pilot clinical trial is to explore the potential efficacy and safety of EA for  
25 insomnia in cancer patients. Therefore, a prospective sample size calculation was not  
26 performed. The result of this study will serve as the basis for sample size calculation for a  
27 full-scale trial on this theme in the future. An opinion from an expert in medical statistics  
28 recommended that the minimal number of people per group be 12 for a pilot study,<sup>45</sup> and  
29 assuming a dropout rate of 20%, 15 participants in each group or a total of 45 participants  
30 will be deemed appropriate for this research setting.  
31  
32  
33  
34  
35  
36  
37  
38  
39  
40  
41  
42

## 43 **Statistical analysis**

44  
45 A full analysis set (FAS), which realises the intention-to-treat ideal as closely as possible,<sup>46</sup>  
46 will be the main set for primary analysis. The FAS includes all participants initially allocated  
47 to one of the three groups of the study; however, it excludes the data from participants who  
48 do not meet the eligibility criteria, who never received the intervention in this study, or who  
49 never provided any outcome value in this study. A per-protocol (PP) set will be used for  
50 sensitivity analysis to compare the results from the FAS. The PP set comprises the  
51  
52  
53  
54  
55  
56  
57  
58  
59  
60

1  
2  
3  
4 participants who completed the trial without major violation of the protocol, with having  
5 received at least 70% of the planned intervention and provided all outcome values.  
6  
7

8 A two-sided significance level will be set at 5%, and the multiple imputation method will be  
9 adopted for missing data. SAS® Version 9.4 (SAS institute. Inc., Cary, NC) will be used for  
10 statistical analysis.  
11  
12

13 Demographic characteristics and baseline measurements of the variables of each group will  
14 be summarised. Continuous data will be expressed as the mean  $\pm$  standard deviation. Analysis  
15 of variance (ANOVA) or the Kruskal–Wallis test will performed to compare the continuous  
16 data from each group. A 95% confidence interval can be presented as needed. For  
17 dichotomous or categorical data, frequency and percentile will be presented, and the  
18 difference between groups will be compared using a chi-square test or the Fisher's exact test.  
19  
20  
21  
22  
23

24 The mean change of the ISI score from baseline to week 5 is the primary outcome measure of  
25 this study. To identify statistically significant differences in the primary outcome measure  
26 between groups, two sets of hypotheses are assumed as described below.  
27  
28  
29  
30  
31  
32

#### 33 Set 1

34  
35 The null hypothesis ( $H_{01}$ ): There is no difference in the mean change of the ISI before and after  
36 treatment between the EA group and the usual care group.  
37

38 The alternative hypothesis ( $H_{11}$ ): There is a difference in the mean change of the ISI before and after  
39 treatment between the EA group and the usual care group.  
40  
41  
42

#### 43 Set 2

44  
45 The null hypothesis ( $H_{02}$ ): There is no difference in the mean change of the ISI before and after  
46 treatment between the EA group and the sham EA group.  
47  
48

49 The alternative hypothesis ( $H_{12}$ ): There is a difference in the mean change of the ISI before and after  
50 treatment between the EA group and the sham EA group.  
51  
52  
53  
54  
55  
56  
57  
58  
59  
60

1  
2  
3  
4 If  $H_{01}$  is rejected and  $H_{11}$  is adopted in the statistical analysis for set 1, the test for the  
5 hypotheses of set 2 will be verified. However, if  $H_{01}$  is adopted in the test for the set 1  
6 hypotheses, no further validation for the set 2 hypotheses will be required.  
7  
8

9  
10 To validate the hypotheses, an analysis of covariance (ANCOVA) will be performed with the  
11 baseline value as a covariate and each group as a fixed factor. If there is any significant  
12 difference between groups among the demographic characteristics or baseline measurements  
13 of the variables, it will be adjusted according to its covariance. The problem of multiple  
14 comparison will be solved using the fixed sequence method.<sup>47</sup>  
15  
16  
17

18  
19 The secondary outcome measures will be analysed via the same methods used for the primary  
20 outcome measure analysis. The change of the outcome measures before and after the  
21 intervention within a group will be analysed using Student's paired t-test or Wilcoxon signed-  
22 rank test. Repeated measures ANOVA with post-hoc Dunnett's procedure will be used to  
23 validate the differences in the trends per visit.  
24  
25  
26

27  
28 Subgroup analysis will be conducted to determine whether the severity of insomnia,  
29 significant blood deficiency pattern according to a blood deficiency scoring system, or level  
30 of expectancy to the EA treatment at baseline affects the clinical response to EA. The  
31 correlation of the sleep-related variables extracted from an objective source (actigraphy) and  
32 a subjective source (patient-reported questionnaires) will be evaluated.  
33  
34  
35  
36  
37  
38  
39  
40  
41  
42

## 43 **Ethics and dissemination**

44  
45 Licensed doctors of Korean medicine will obtain informed consent at each research centre.  
46 Only the participants who sign the informed consent form will be included in the study. The  
47 study protocol has been approved by the institutional review boards (IRBs) of the  
48 participating research centres; Daejeon Oriental Hospital of Daejeon University and Dong-eui  
49 University Korean Medical Hospital in Busan. The approved protocol was registered with the  
50 Clinical Research Information Service (CRIS) of South Korea (CRIS-KCT0002162).  
51  
52  
53  
54  
55  
56

1  
2  
3  
4 Any modification to the protocol will be re-approved by the IRBs, documented in the online  
5 registry of CRIS, and reflected in the explanation for the participants. An amended consent  
6 form reflecting the revised protocol must be obtained from the participants.  
7  
8

9  
10 The result of this study will be published in peer-reviewed journals or academic conferences.  
11

## 12 13 14 15 16 17 **DISCUSSION** 18

19  
20 Despite the high prevalence and enormous impact of insomnia in cancer patients, its  
21 importance has been overlooked.<sup>1</sup> The National Cancer Institute and National Comprehensive  
22 Cancer Network have strongly recommended evaluation and appropriate treatment of the  
23 sleep disturbance of cancer survivors during routine survivorship care.<sup>11</sup> Nevertheless, it  
24 seems that most of the hospitals and cancer centres are not properly managing the insomnia  
25 of cancer patients.<sup>11</sup>  
26  
27  
28

29  
30 Insomnia is one of the areas in which acupuncture-related publications have been most  
31 commonly focused for the last 20 years.<sup>48</sup> Previous researches have shown that acupuncture  
32 is an effective intervention for insomnia. Acupuncture also appears to be effective for the  
33 sleep disorders of cancer patients, but its effect on the cancer population has been studied  
34 relatively less than in general insomniacs. Thus, we expect that the results of this study will  
35 contribute to increasing the insufficient evidence in this area of research.  
36  
37  
38

39  
40 Reviewing previous studies, we found that acupuncture may have only a short-term effect on  
41 the insomnia of cancer patients. Mao et al. reported that the sleep quality of the EA group was  
42 significantly better than that of control group immediately after an 8-week intervention period,  
43 but this difference between groups disappeared after 4 weeks.<sup>49</sup> Another study by Otte et al.  
44 also showed a similar pattern that the effect of a 2-week acupuncture treatment vanished after  
45 a 4-week follow-up period.<sup>28</sup>  
46  
47  
48

49  
50 However, according to the opinion of Choi et al., the effect of acupuncture seems to be  
51 strengthened over time.<sup>20</sup> These authors found that acupuncture was as good as conventional  
52 therapy and became better at follow-up visits 3 weeks after final treatment.<sup>20</sup> We will record  
53  
54  
55

1  
2  
3  
4 the trend change of the effect of EA over time by assessing the response of the participants at  
5 baseline; week 3, a midpoint of the 4-week intervention; week 5, immediately after the end of  
6 the final intervention; and week 9, the final follow-up assessment. We expect the results of  
7 this study to contribute to solving the disagreement among the existing studies on the timing  
8 and duration of the effect of acupuncture on sleep disturbance in cancer patients.  
9  
10  
11

12  
13 In addition to time duration, there are many factors that can influence the effectiveness of  
14 acupuncture. Among them, we will try to determine whether a certain pattern identified  
15 according to the theory of Korean traditional medicine, blood deficiency, is an important  
16 variable that can affect the response to acupuncture. Blood deficiency is one of the main  
17 patterns of insomnia in Korean traditional medicine, and this study will investigate how many  
18 patients are categorised with a blood deficiency pattern using a blood deficiency scoring  
19 system<sup>50</sup> and whether their treatment response is different from the non-blood deficiency  
20 group.  
21  
22  
23  
24  
25

26  
27 In insomnia clinical trials, the placebo effect is very commonly observed.<sup>51</sup> The  
28 characteristics of insomnia—that it is intermittent and tends to maintain or even reinforce the  
29 therapeutic effect of specific treatment over long periods—seems to explain such a placebo  
30 effect.<sup>51</sup> This is the reason why the inclusion of a placebo control is generally recommended  
31 in insomnia clinical trials.<sup>51</sup> Thus, this study also included a sham EA group as a placebo  
32 control.  
33  
34  
35  
36

37  
38 The sham EA group will receive sham acupuncture therapy at non-acupoints unrelated to  
39 insomnia using a Streitberger placebo needle. This placebo needle was devised by  
40 Streitberger and Kleinhenz in 1998.<sup>52</sup> Its appearance is the same as real acupuncture needles,  
41 but the needle does not penetrate the skin. The suitability of this device as a placebo  
42 comparator for acupuncture needles has been validated,<sup>52</sup> and it has been used as a control  
43 intervention in several acupuncture clinical studies.<sup>53</sup>  
44  
45  
46  
47

48  
49 The Streitberger placebo needle is one of the two most commonly used and commercially  
50 available placebo devices in acupuncture clinical studies along with the Park sham placebo  
51 device.<sup>53</sup> Nevertheless, approximately half of the clinical studies using these placebo  
52 acupuncture needles have concluded that the effects of real acupuncture and placebo needles  
53 were not significantly different.<sup>53</sup> Generally, a placebo pill is used on the assumption that it  
54  
55  
56  
57  
58  
59  
60

1  
2  
3  
4 has no pharmacological effect and is harmless.<sup>54</sup> However, it has been repeatedly shown that  
5 placebo acupuncture needles seem to have a significant physiological effect in many studies  
6 so far.<sup>54</sup> Thus, the development of a new placebo device as a perfect comparator for real  
7 acupuncture that has no physiologic effects while maintaining patient blinding is still a  
8 significant challenge for acupuncture researchers. However, we currently have no choice but  
9 to use one of these available placebo devices considering their limitations.

10  
11 It is known that the proportion of the placebo effect is not inconsiderable in acupuncture  
12 treatment.<sup>54</sup> Thus, a study design that directly compares acupuncture and placebo acupuncture  
13 is likely to produce a false negative result, failing to detect the whole characteristic effect of  
14 acupuncture.<sup>54</sup> Moreover, as we have seen, patients with insomnia tend to respond strongly to  
15 placebo treatment. Therefore, we designed a three-arm parallel study including the usual care  
16 group as well as a placebo control group.

17  
18 The strength of this study is that it will acquire objective outcomes reflecting sleep quality  
19 and the related circadian rhythm. First, we will obtain both subjective and objective outcomes  
20 showing sleep quality using patient-reported questionnaires and actigraphy. Most of the  
21 acupuncture studies on insomnia have used only patient-reported outcomes; furthermore,  
22 even a small number of studies using objective outcomes such as polysomnography or  
23 actigraphy failed to show consistent results on the effect of acupuncture for each outcome.<sup>30-</sup>  
24  
25 <sup>34</sup> Based on the results of this study, we expect that we will be able to compare the difference  
26 between the subjective and objective outcomes and contribute to solving the conflict on this  
27 issue. Only actigraphy is used for objective outcome measures at this time; however,  
28 polysomnography, a gold standard method for insomnia diagnosis, should be included in  
29 future research.

30  
31 Second, the difference in the levels of cortisol and melatonin in saliva between the groups  
32 will be compared as biomarkers reflecting the circadian rhythm of the body that affects the  
33 pattern of sleep. It is known that acupuncture modulates various neurotransmitters and  
34 hormones such as endorphin, serotonin, norepinephrine, cortisol and melatonin.<sup>39 40</sup> Among  
35 them, changes of the cortisol surge in the morning or melatonin increase at night time are  
36 known to be closely related to arousal and sleep.<sup>39 40</sup> Previous studies have reported that  
37 acupuncture can improve insomnia by affecting the pattern of cortisol<sup>55 56</sup> or melatonin<sup>27</sup>

1  
2  
3  
4 release. Based on these results, we will investigate the changes in salivary cortisol and  
5 melatonin in addition to the sleep quality of the participants.  
6  
7  
8  
9

## 10 **Trial status**

11  
12 This trial is currently recruiting participants.  
13  
14

## 15 **Author affiliations**

16  
17  
18 <sup>1</sup> Clinical Research Division, Korea Institute of Oriental Medicine, Daejeon, Republic of  
19 Korea  
20

21  
22 <sup>2</sup> Department of Neuropsychiatry, College of Oriental Medicine, Dong-eui University, Busan,  
23 Republic of Korea  
24

25  
26 <sup>3</sup> Department of Internal Medicine, College of Traditional Korean Medicine, Daejeon  
27 University, Daejeon, Republic of Korea  
28  
29

## 30 **Contributors**

31  
32 MK and JHK conceived the study. MK drafted the protocol. JEK, HYL, ARK, and HJP  
33 participated in the design of the study and contributed to the refinement of the protocol. OJK  
34 was responsible for the statistical design of the study. BKK and JHC provided clinical advice  
35 and made critical revisions. JHK is a principal investigator of the study and has the final  
36 responsibility for the decision to submit this manuscript for publication. All authors approved  
37 the final manuscript.  
38  
39  
40  
41

## 42 **Funding**

43  
44 This work was supported by the Korea Institute of Oriental Medicine (grant number K16122  
45 & K17122).  
46  
47

## 48 **Competing interests**

49  
50 None declared.  
51

## 52 **Patient consent**

53  
54 Will be obtained.  
55  
56



**Ethics approval**

Daejeon Oriental Hospital of Daejeon University IRB (djomc-140-1); Dong-eui University  
Korean Medical Hospital IRB (2016-04)

**Provenance and peer review**

Not commissioned; this study was peer reviewed for ethics and funding approval prior to  
submission.

**Data sharing statement**

Requested data for public purpose or research transparency will be provided (please contact  
the corresponding author).

## REFERENCES

1. Savard J, Morin CM. Insomnia in the context of cancer: a review of a neglected problem. *J Clin Oncol* 2001;**19**(3):895-908.
2. Beck SL, Berger AM, Barsevick AM, et al. Sleep quality after initial chemotherapy for breast cancer. *Support Care Cancer* 2010;**18**(6):679-89.
3. Fiorentino L, Ancoli-Israel S. Sleep dysfunction in patients with cancer. *Curr Treat Options Neurol* 2007;**9**(5):337-46.
4. Lis CG, Gupta D, Grutsch JF. The relationship between insomnia and patient satisfaction with quality of life in cancer. *Support Care Cancer* 2008;**16**(3):261-66.
5. Bower JE, Ganz PA, Irwin MR, et al. Inflammation and behavioral symptoms after breast cancer treatment: do fatigue, depression, and sleep disturbance share a common underlying mechanism? *J Clin Oncol* 2011;**29**(26):3517-22.
6. Sharma N, Hansen CH, O'connor M, et al. Sleep problems in cancer patients: prevalence and association with distress and pain. *Psycho-Oncology* 2012;**21**(9):1003-09.
7. Jean-Pierre P, Grandner MA, Garland SN, et al. Self-reported memory problems in adult-onset cancer survivors: effects of cardiovascular disease and insomnia. *Sleep Med* 2015;**16**(7):845-49.
8. Biomarkers, fatigue, sleep, and depressive symptoms in women with breast cancer: a pilot study. *Oncol Nurs Forum*; 2006.
9. Innominato PF, Focan C, Gorlia T, et al. Circadian rhythm in rest and activity: a biological correlate of quality of life and a predictor of survival in patients with metastatic colorectal cancer. *Cancer Res* 2009;**69**(11):4700-07.
10. Cash E, Sephton S, Chagpar A, et al. Circadian disruption and biomarkers of tumor progression in breast cancer patients awaiting surgery. *Brain Behav Immun* 2015;**48**:102-14.
11. Zhou ES, Partridge AH, Syrjala KL, et al. Evaluation and treatment of insomnia in adult cancer survivorship programs. *J Cancer Surviv* 2016:1-6.
12. Garland SN, Gehrman P, Barg FK, et al. CHOosing Options for Insomnia in Cancer Effectively (CHOICE): Design of a patient centered comparative effectiveness trial of acupuncture and cognitive behavior therapy for insomnia. *Contemp Clin Trials* 2016;**47**:349-55.
13. Moore TA, Berger AM, Dizona P. Sleep aid use during and following breast cancer adjuvant chemotherapy. *Psycho-Oncology* 2011;**20**(3):321-25.
14. Espie CA, MacMahon K, Kelly H, et al. Randomized clinical effectiveness trial of nurse-administered small-group cognitive behavior therapy for persistent insomnia in general practice. *Sleep* 2007;**30**(5):574.
15. Cao H, Pan X, Li H, et al. Acupuncture for treatment of insomnia: a systematic review of randomized controlled trials. *J Altern Complement Med* 2009;**15**(11):1171-86.

16. Cheuk DK, Yeung WF, Chung K, et al. Acupuncture for insomnia. *Cochrane Database Syst Rev* 2012;**12**(9):CD005472.
17. Shergis JL, Ni X, Jackson ML, et al. A systematic review of acupuncture for sleep quality in people with insomnia. *Complement Ther Med* 2016;**26**:11-20.
18. Garcia MK, Cohen L, Spano M, et al. Inpatient Acupuncture at a Major Cancer Center. *Integr Cancer Ther* 2016:1534735416685403.
19. Garland SN, Xie SX, Li Q, et al. Comparative effectiveness of electro-acupuncture versus gabapentin for sleep disturbances in breast cancer survivors with hot flashes: a randomized trial. *Menopause* 2016.
20. Choi TY, Kim JI, Lim HJ, et al. Acupuncture for Managing Cancer-Related Insomnia: A Systematic Review of Randomized Clinical Trials. *Integr Cancer Ther* 2016.
21. Krystal AD, Edinger JD. Measuring sleep quality. *Sleep Med* 2008;**9**:S10-S17.
22. Lovin PA, Ehrenpreis AB. The role of polysomnography in the differential diagnosis of chronic insomnia. *Am J Psychiatry* 1988;**145**:346-49.
23. Sadeh A, Hauri PJ, Kripke DF, et al. The role of actigraphy in the evaluation of sleep disorders. *Sleep* 1995;**18**(4):288-302.
24. Zhang L, Zhao Z-X. Objective and subjective measures for sleep disorders. *Neurosci Bull* 2007;**23**(4):236-40.
25. Hachul H, Garcia TK, Maciel AL, et al. Acupuncture improves sleep in postmenopause in a randomized, double-blind, placebo-controlled study. *Climacteric* 2013;**16**(1):36-40.
26. Ruan JW, Wang CH, Liao XX, et al. Electroacupuncture treatment of chronic insomniacs. *Chin Med J* 2009;**122**(23):2869-73.
27. Spence DW, Kayumov L, Chen A, et al. Acupuncture increases nocturnal melatonin secretion and reduces insomnia and anxiety: a preliminary report. *J Neuropsychiatry Clin Neurosci* 2004;**16**(1):19-28.
28. Otte JL, Carpenter JS, Zhong X, et al. Feasibility study of acupuncture for reducing sleep disturbances and hot flashes in post-menopausal breast cancer survivors. *Clin Nurse Spec* 2011;**25**(5):228.
29. Yeung W-F, Chung K-F, Zhang S-P, et al. Electroacupuncture for primary insomnia: a randomized controlled trial. *Sleep* 2009;**32**(8):1039-47.
30. Hwang EH. Effects of hand acupuncture therapy on sleep quality in sleep disrupted adults: verification by polysomnography and cerebral blood flow test. *Taehan Kanho Hakhoe chi* 2007;**37**(7):1108-18.
31. Kaiser-Pagliarini T, Hachul H, Maciel A, et al. Acupuncture in insomnia and its consequences in postmenopausal women. *Sleep Med* 2009;**10**:S18.
32. Chung K, Yeung W, Zhang S, et al. Acupuncture for persistent insomnia associated with major depressive disorder: a randomised controlled trial. *Hong Kong Med J* 2016.

- 1  
2  
3  
4  
5  
6  
7  
8  
9  
10  
11  
12  
13  
14  
15  
16  
17  
18  
19  
20  
21  
22  
23  
24  
25  
26  
27  
28  
29  
30  
31  
32  
33  
34  
35  
36  
37  
38  
39  
40  
41  
42  
43  
44  
45  
46  
47  
48  
49  
50  
51  
52  
53  
54  
55  
56  
57  
58  
59  
60
33. Chung K-F, Yeung W-F, Yu Y-M, et al. Acupuncture for residual insomnia associated with major depressive disorder: a placebo-and sham-controlled, subject-and assessor-blind, randomized trial. *J Clin Psychiatry* 2015;**76**(6):e752-60.
  34. Yeung W-F, Chung K-F, Tso K-C, et al. Electroacupuncture for residual insomnia associated with major depressive disorder: a randomized controlled trial. *Sleep* 2011;**34**(6):807-15.
  35. Morin CM, Belleville G, Bélanger L, et al. The Insomnia Severity Index: psychometric indicators to detect insomnia cases and evaluate treatment response. *Sleep* 2011;**34**(5):601-08.
  36. Buysse DJ, Reynolds CF, Monk TH, et al. The Pittsburgh Sleep Quality Index: a new instrument for psychiatric practice and research. *Psychiatry Res* 1989;**28**(2):193-213.
  37. Yellen SB, Cella DF, Webster K, et al. Measuring fatigue and other anemia-related symptoms with the Functional Assessment of Cancer Therapy (FACT) measurement system. *J Pain Symptom Manage* 1997;**13**(2):63-74.
  38. Arcuri GG, Palladini L, Dumas G, et al. Exploring the measurement properties of the Montreal Cognitive Assessment in a population of people with cancer. *Support Care Cancer* 2015;**23**(9):2779-87.
  39. Huang W, Kutner N, Bliwise DL. Autonomic activation in insomnia: the case for acupuncture. *J Clin Sleep Med* 2011;**7**(1):95-102.
  40. Zhao K. Acupuncture for the treatment of insomnia. *Int Rev Neurobiol* 2013;**111**:217-34.
  41. Carney CE, Buysse DJ, Ancoli-Israel S, et al. The consensus sleep diary: standardizing prospective sleep self-monitoring. *Sleep* 2012;**35**(2):287-302.
  42. Devilly GJ, Borkovec TD. Psychometric properties of the credibility/expectancy questionnaire. *J Behav Ther Exp Psychiatry* 2000;**31**(2):73-86.
  43. US department of Health and Human Services. National Institutes of Health, National Cancer Institute: National Institutes of Health (2009) Common terminology criteria for adverse events (CTCAE) version 4.0. NIH Publication No. 03-5410. [https://evs.nci.nih.gov/ftp1/CTCAE/CTCAE\\_4.03\\_2010-06-14\\_QuickReference\\_5x7.pdf](https://evs.nci.nih.gov/ftp1/CTCAE/CTCAE_4.03_2010-06-14_QuickReference_5x7.pdf) (accessed 19 Jan 2017).
  44. Spilker B. *Quality of life and pharmacoeconomics in clinical trials*. 2nd ed. Philadelphia: Lippencott-Raven, 1995.
  45. Julious SA. Sample size of 12 per group rule of thumb for a pilot study. *Pharm Stat* 2005;**4**(4):287-91.
  46. European Medicines Agency: ICH Topic E9. Statistical principles for clinical trials. [http://www.ema.europa.eu/docs/en\\_GB/document\\_library/Scientific\\_guideline/2009/09/WC50002928.pdf](http://www.ema.europa.eu/docs/en_GB/document_library/Scientific_guideline/2009/09/WC50002928.pdf) (accessed 19 Jan 2017).
  47. Wiens BL. A fixed sequence Bonferroni procedure for testing multiple endpoints. *Pharm Stat* 2003;**2**(3):211-15.
  48. Ma Y, Dong M, Zhou K, et al. Publication Trends in Acupuncture Research: A 20-Year

- 1  
2  
3  
4 Bibliometric Analysis Based on PubMed. PLoS One 2016;**11**(12):e0168123.  
5  
6 49. Mao JJ, Farrar JT, Bruner D, et al. Electroacupuncture for fatigue, sleep, and psychological  
7 distress in breast cancer patients with aromatase inhibitor-related arthralgia: A randomized  
8 trial. Cancer 2014;**120**(23):3744-51.  
9  
10 50. Terasawa KT. *Kampo diagnosis of western medical doctor*. Seoul: Jipmundang, 1998.  
11 51. Perlis ML, McCall WV, Jungquist CR, et al. Placebo effects in primary insomnia. Sleep Med Rev  
12 2005;**9**(5):381-89.  
13  
14 52. Kleinhenz J, Streitberger K, Windeler J, et al. Randomised clinical trial comparing the effects of  
15 acupuncture and a newly designed placebo needle in rotator cuff tendinitis. Pain  
16 1999;**83**(2):235-41.  
17  
18 53. Zhang CS, Tan HY, Zhang GS, et al. Placebo devices as effective control methods in  
19 acupuncture clinical trials: a systematic review. PLoS One 2015;**10**(11):e0140825.  
20  
21 54. Paterson C, Dieppe P. Characteristic and incidental (placebo) effects in complex interventions  
22 such as acupuncture. BMJ 2005;**330**(7501):1202.  
23  
24 55. Akimoto T, Nakahori C, Aizawa K, et al. Acupuncture and responses of immunologic and  
25 endocrine markers during competition. Med Sci Sports Exerc 2003;**35**(8):1296-302.  
26  
27 56. Liu S, Zhou W, Ruan X, et al. Activation of the hypothalamus characterizes the response to  
28 acupuncture stimulation in heroin addicts. Neurosci Lett 2007;**421**(3):203-08.  
29  
30  
31  
32  
33  
34  
35  
36  
37  
38  
39  
40  
41  
42  
43  
44  
45  
46  
47  
48  
49  
50  
51  
52  
53  
54  
55  
56  
57  
58  
59  
60

1  
2  
3  
4 **Table** (in the main text)  
5  
6

7 **Table 1** Schedule of enrolment, interventions, and assessments  
8  
9

10  
11 **Figure titles**  
12

13  
14 **Figure 1** Flow diagram of the study  
15

16  
17 **Figure 2** The points used for the electroacupuncture group  
18  
19

20  
21  
22 **Supplementary file**  
23  
24

25 **Supplementary File 1** Details of the electroacupuncture (EA) and sham EA treatment based  
26 on the Standards for Reporting Interventions in Clinical Trials of Acupuncture (STRICTA)  
27 checklist  
28  
29  
30  
31  
32  
33  
34  
35  
36  
37  
38  
39  
40  
41  
42  
43  
44  
45  
46  
47  
48  
49  
50  
51  
52  
53  
54  
55  
56  
57  
58  
59  
60

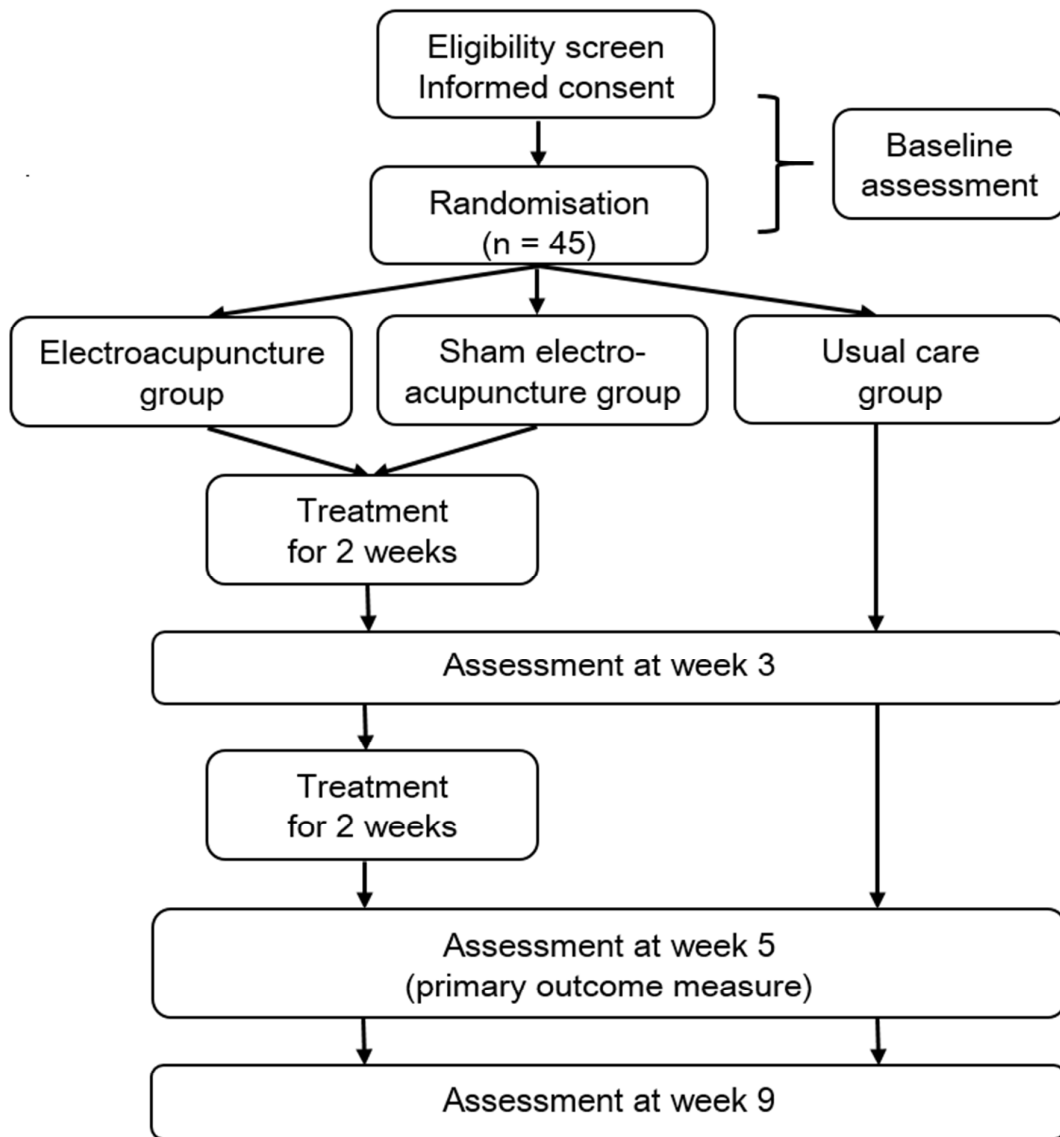

only

1  
2  
3  
4  
5  
6  
7  
8  
9  
10  
11  
12  
13  
14  
15  
16  
17  
18  
19  
20  
21  
22  
23  
24  
25  
26  
27  
28  
29  
30  
31  
32  
33  
34  
35  
36  
37  
38  
39  
40  
41  
42  
43  
44  
45  
46  
47  
48  
49

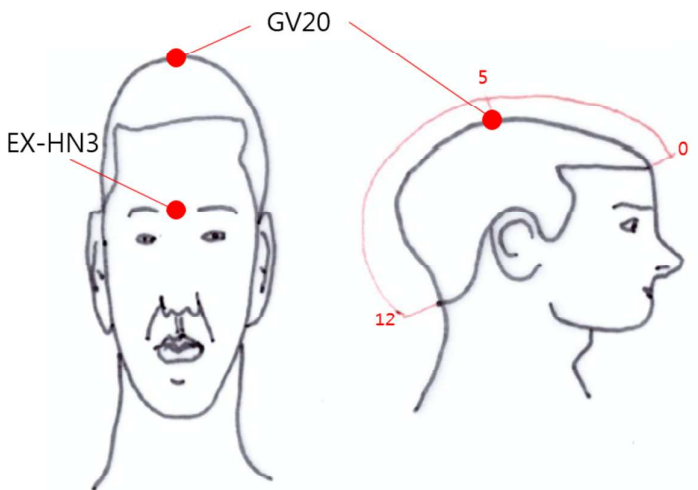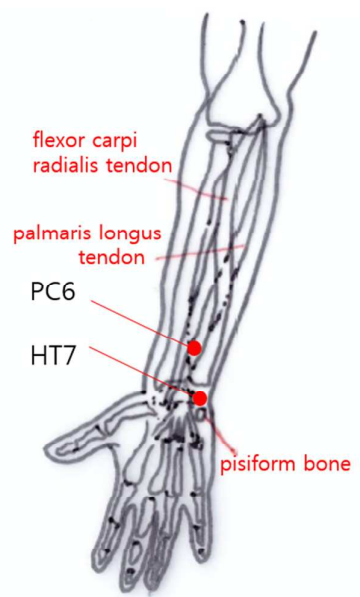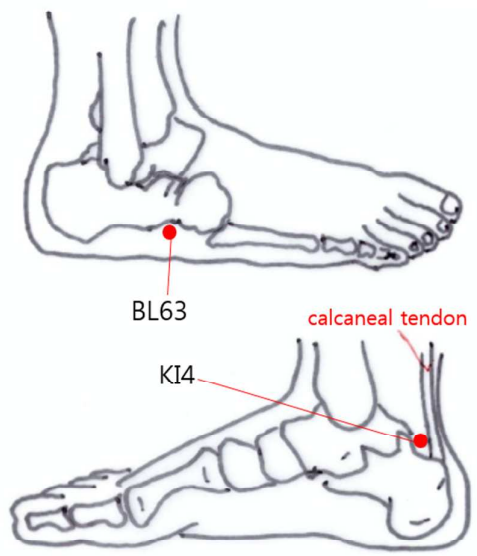

For peer review only



**Supplementary file 1** Details of the electroacupuncture (EA) and sham EA treatments based on the Standards for Reporting Interventions in Clinical Trials of Acupuncture (STRICTA) checklist

| Item                                          | Detail                                                                                                                                               | Description                                                                                                                                                                                                                                                                                                                                                                                                                                                                                                                                                                                                               |
|-----------------------------------------------|------------------------------------------------------------------------------------------------------------------------------------------------------|---------------------------------------------------------------------------------------------------------------------------------------------------------------------------------------------------------------------------------------------------------------------------------------------------------------------------------------------------------------------------------------------------------------------------------------------------------------------------------------------------------------------------------------------------------------------------------------------------------------------------|
| <b>1. Acupuncture rationale</b>               | 1a) Style of acupuncture                                                                                                                             | Electroacupuncture based on traditional Korean acupuncture                                                                                                                                                                                                                                                                                                                                                                                                                                                                                                                                                                |
|                                               | 1b) Reasoning for treatment provided, based on historical context, literature sources, and/or consensus methods, with references where appropriate   | Related papers <sup>15-20,25-29,31-34</sup> and expert (doctors of Korean medicine) consensus                                                                                                                                                                                                                                                                                                                                                                                                                                                                                                                             |
|                                               | 1c) Extent to which treatment was varied                                                                                                             | Standardized treatment (option: up to 2 bilateral acupoints can be added according to the chief complaints of the participants)                                                                                                                                                                                                                                                                                                                                                                                                                                                                                           |
| <b>2. Details of needling</b>                 | 2a) Number of needle insertions per subject per session                                                                                              | Standardized regimen: 10 (10 to 14, when considering addition of optional acupoints)                                                                                                                                                                                                                                                                                                                                                                                                                                                                                                                                      |
|                                               | 2b) Names of points used                                                                                                                             | GV 20, EX-HN-3, bilateral HT7, PC6, BL63, KI4                                                                                                                                                                                                                                                                                                                                                                                                                                                                                                                                                                             |
|                                               | 2c) Depth of insertion, based on a specified unit of measurement, or on a particular tissue level                                                    | 0.6 – 4.5 cm                                                                                                                                                                                                                                                                                                                                                                                                                                                                                                                                                                                                              |
|                                               | 2d) Response sought                                                                                                                                  | Acupuncture: <i>de qi</i> (sense of soreness, numbness, heaviness, or distension)<br>EA: cognition of stimulation and comfortable feeling                                                                                                                                                                                                                                                                                                                                                                                                                                                                                 |
|                                               | 2e) Needle stimulation                                                                                                                               | Manual stimulation: twisting-needling 3-5 times<br>Electrical stimulation: 4 Hz                                                                                                                                                                                                                                                                                                                                                                                                                                                                                                                                           |
|                                               | 2f) Needle retention time                                                                                                                            | 30 minutes                                                                                                                                                                                                                                                                                                                                                                                                                                                                                                                                                                                                                |
|                                               | 2g) Needle type (diameter, length, and manufacturer or material)                                                                                     | Acupuncture (diameter: 0.25 mm, length: 25 mm, manufacturer: Asiamed GmbH & Co., material: sterilized stainless steel)                                                                                                                                                                                                                                                                                                                                                                                                                                                                                                    |
| <b>3. Treatment regimen</b>                   | 3a) Number of treatment sessions                                                                                                                     | 10                                                                                                                                                                                                                                                                                                                                                                                                                                                                                                                                                                                                                        |
|                                               | 3b) Frequency and duration of treatment sessions                                                                                                     | 10 sessions for 4 weeks (average 2.5 times per week)                                                                                                                                                                                                                                                                                                                                                                                                                                                                                                                                                                      |
| <b>4. Other components of treatment</b>       | 4a) Details of other interventions administered to the acupuncture group                                                                             | <ul style="list-style-type: none"> <li>- All the three groups will be educated with a brochure about the management of sleep disorder</li> <li>- No additional Korean traditional medical treatment regarding insomnia is allowed except for what is given for the study</li> <li>- The interventions other than Korean traditional medical treatment to manage insomnia that have been steadily received for more than 4 weeks before the screening visit are allowed to continue during the study, but no additional treatment is allowed after the beginning of the trial (even sleeping pills are allowed)</li> </ul> |
|                                               | 4b) Setting and context of treatment, including instructions to practitioners, and information and explanations to patients                          | <ul style="list-style-type: none"> <li>- Setting: clinical trial centers in university hospitals</li> <li>- Unnecessary conversation will be limited between the acupuncturists and patients during the treatment.</li> </ul>                                                                                                                                                                                                                                                                                                                                                                                             |
| <b>5. Practitioner background</b>             | 5) Description of participating acupuncturists (qualification or professional affiliation, years in acupuncture practice, other relevant experience) | Licensed Korean medical doctors with at least 2 years of clinical experience                                                                                                                                                                                                                                                                                                                                                                                                                                                                                                                                              |
| <b>6. Control or comparator interventions</b> | 6a) Rationale for the control or comparator in the context of the research question, with sources that justify this choice                           | <p>Sham acupuncture: previous researches validating the nonpenetrating sham acupuncture device, Streitberger acupuncture needle<sup>52</sup></p> <p>Mock electroacupuncture: previous researches with control intervention with no electrical stimulation with beeping sound and lighting<sup>29,32-34,49</sup></p>                                                                                                                                                                                                                                                                                                       |

1  
2  
3  
4  
5  
6  
7  
8  
9  
10  
11  
12  
13  
14  
15  
16  
17  
18  
19  
20  
21  
22  
23  
24  
25  
26  
27  
28  
29  
30  
31  
32  
33  
34  
35  
36  
37  
38  
39  
40  
41  
42  
43  
44  
45  
46  
47  
48  
49  
50  
51  
52  
53  
54  
55  
56  
57  
58  
59  
60

|  |                                                                                                                                                                                    |                                                                                                                                                                                                                                                                                                                                                                                                                                                                                                                                                                                                                                                                                                                                                                                                                                                                                                                                                                            |
|--|------------------------------------------------------------------------------------------------------------------------------------------------------------------------------------|----------------------------------------------------------------------------------------------------------------------------------------------------------------------------------------------------------------------------------------------------------------------------------------------------------------------------------------------------------------------------------------------------------------------------------------------------------------------------------------------------------------------------------------------------------------------------------------------------------------------------------------------------------------------------------------------------------------------------------------------------------------------------------------------------------------------------------------------------------------------------------------------------------------------------------------------------------------------------|
|  | <p>6b) Precise description of the control or comparator. If sham acupuncture or any other type of acupuncture-like control is used, provide details as for Items 1 to 3 above.</p> | <p>1. rationale of sham acupuncture<br/>Use non-penetrating Streitberger acupuncture needles at 10 non-acupoints and connect electrostimulator in switch-off state on to the needles</p> <p>2. points used for sham EA</p> <ul style="list-style-type: none"> <li>- Upper limb 1: 1 cm lateral and 5 cm proximal points from cubital creases of bilateral arms</li> <li>- Upper limb 2: 2 cm above the upper limb 1 point</li> <li>- Lower limb 1: 1.5 cm above the depression at the midpoint of the upper border of the bilateral patella</li> <li>- Lower limb 2: area 1/3 above the medial part of the bilateral tibia</li> <li>- Lower limb 3: 1.5 cm above the lower limb 2 point</li> </ul> <p>3. number of needle insertions per subject per session: 10</p> <p>4. needle type<br/>Sham acupuncture (Streitberger needle, Asiamed GmbH &amp; Co., sterilized stainless steel)</p> <p>5. Treatment duration, frequency, period: the same as the treatment group</p> |
|--|------------------------------------------------------------------------------------------------------------------------------------------------------------------------------------|----------------------------------------------------------------------------------------------------------------------------------------------------------------------------------------------------------------------------------------------------------------------------------------------------------------------------------------------------------------------------------------------------------------------------------------------------------------------------------------------------------------------------------------------------------------------------------------------------------------------------------------------------------------------------------------------------------------------------------------------------------------------------------------------------------------------------------------------------------------------------------------------------------------------------------------------------------------------------|

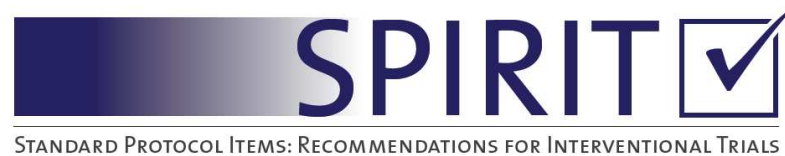

## SPIRIT 2013 Checklist: Recommended items to address in a clinical trial protocol and related documents\*

| Section/item                      | Item No | Description                                                                                                                                                                                                                                                                              | Addressed on page number         |
|-----------------------------------|---------|------------------------------------------------------------------------------------------------------------------------------------------------------------------------------------------------------------------------------------------------------------------------------------------|----------------------------------|
| <b>Administrative information</b> |         |                                                                                                                                                                                                                                                                                          |                                  |
| Title                             | 1       | Descriptive title identifying the study design, population, interventions, and, if applicable, trial acronym                                                                                                                                                                             | __ title page __                 |
| Trial registration                | 2a      | Trial identifier and registry name. If not yet registered, name of intended registry                                                                                                                                                                                                     | _at the end of the abstract_____ |
|                                   | 2b      | All items from the World Health Organization Trial Registration Data Set                                                                                                                                                                                                                 | _____ - _____                    |
| Protocol version                  | 3       | Date and version identifier                                                                                                                                                                                                                                                              | _____ - _____                    |
| Funding                           | 4       | Sources and types of financial, material, and other support                                                                                                                                                                                                                              | _____ 19 _____                   |
| Roles and responsibilities        | 5a      | Names, affiliations, and roles of protocol contributors                                                                                                                                                                                                                                  | _____ 19 _____                   |
|                                   | 5b      | Name and contact information for the trial sponsor                                                                                                                                                                                                                                       | _____ - _____                    |
|                                   | 5c      | Role of study sponsor and funders, if any, in study design; collection, management, analysis, and interpretation of data; writing of the report; and the decision to submit the report for publication, including whether they will have ultimate authority over any of these activities | _____ - _____                    |
|                                   | 5d      | Composition, roles, and responsibilities of the coordinating centre, steering committee, endpoint adjudication committee, data management team, and other individuals or groups overseeing the trial, if applicable (see Item 21a for data monitoring committee)                         | _____ - _____                    |

1  
2  
3 **Introduction**  
4

|    |                          |    |                                                                                                                                                                                                           |                   |
|----|--------------------------|----|-----------------------------------------------------------------------------------------------------------------------------------------------------------------------------------------------------------|-------------------|
| 5  | Background and rationale | 6a | Description of research question and justification for undertaking the trial, including summary of relevant studies (published and unpublished) examining benefits and harms for each intervention        | _____ 1-3 _____   |
| 6  |                          | 6b | Explanation for choice of comparators                                                                                                                                                                     | _____ 8-9 _____   |
| 7  |                          | 7  | Specific objectives or hypotheses                                                                                                                                                                         | _____ 3, 14 _____ |
| 8  | Objectives               |    |                                                                                                                                                                                                           |                   |
| 9  | Trial design             | 8  | Description of trial design including type of trial (eg, parallel group, crossover, factorial, single group), allocation ratio, and framework (eg, superiority, equivalence, noninferiority, exploratory) | _____ 3 _____     |
| 10 |                          |    |                                                                                                                                                                                                           |                   |
| 11 |                          |    |                                                                                                                                                                                                           |                   |
| 12 |                          |    |                                                                                                                                                                                                           |                   |
| 13 |                          |    |                                                                                                                                                                                                           |                   |
| 14 |                          |    |                                                                                                                                                                                                           |                   |
| 15 |                          |    |                                                                                                                                                                                                           |                   |

16 **Methods: Participants, interventions, and outcomes**  
17

|    |                      |     |                                                                                                                                                                                                                                                                                                                                                                                |                                 |
|----|----------------------|-----|--------------------------------------------------------------------------------------------------------------------------------------------------------------------------------------------------------------------------------------------------------------------------------------------------------------------------------------------------------------------------------|---------------------------------|
| 18 | Study setting        | 9   | Description of study settings (eg, community clinic, academic hospital) and list of countries where data will be collected. Reference to where list of study sites can be obtained                                                                                                                                                                                             | _____ 4 _____                   |
| 19 |                      |     |                                                                                                                                                                                                                                                                                                                                                                                |                                 |
| 20 | Eligibility criteria | 10  | Inclusion and exclusion criteria for participants. If applicable, eligibility criteria for study centres and individuals who will perform the interventions (eg, surgeons, psychotherapists)                                                                                                                                                                                   | _____ 5-7, 13 _____             |
| 21 |                      |     |                                                                                                                                                                                                                                                                                                                                                                                |                                 |
| 22 | Interventions        | 11a | Interventions for each group with sufficient detail to allow replication, including how and when they will be administered                                                                                                                                                                                                                                                     | _____ 8-9 _____                 |
| 23 |                      | 11b | Criteria for discontinuing or modifying allocated interventions for a given trial participant (eg, drug dose change in response to harms, participant request, or improving/worsening disease)                                                                                                                                                                                 | _____ 9 _____                   |
| 24 |                      | 11c | Strategies to improve adherence to intervention protocols, and any procedures for monitoring adherence (eg, drug tablet return, laboratory tests)                                                                                                                                                                                                                              | _____ - _____                   |
| 25 |                      | 11d | Relevant concomitant care and interventions that are permitted or prohibited during the trial                                                                                                                                                                                                                                                                                  | _____ 9 _____                   |
| 26 |                      |     |                                                                                                                                                                                                                                                                                                                                                                                |                                 |
| 27 | Outcomes             | 12  | Primary, secondary, and other outcomes, including the specific measurement variable (eg, systolic blood pressure), analysis metric (eg, change from baseline, final value, time to event), method of aggregation (eg, median, proportion), and time point for each outcome. Explanation of the clinical relevance of chosen efficacy and harm outcomes is strongly recommended | _____ 10-12 _____               |
| 28 |                      |     |                                                                                                                                                                                                                                                                                                                                                                                |                                 |
| 29 |                      |     |                                                                                                                                                                                                                                                                                                                                                                                |                                 |
| 30 |                      |     |                                                                                                                                                                                                                                                                                                                                                                                |                                 |
| 31 |                      |     |                                                                                                                                                                                                                                                                                                                                                                                |                                 |
| 32 |                      |     |                                                                                                                                                                                                                                                                                                                                                                                |                                 |
| 33 |                      |     |                                                                                                                                                                                                                                                                                                                                                                                |                                 |
| 34 |                      |     |                                                                                                                                                                                                                                                                                                                                                                                |                                 |
| 35 |                      |     |                                                                                                                                                                                                                                                                                                                                                                                |                                 |
| 36 | Participant timeline | 13  | Time schedule of enrolment, interventions (including any run-ins and washouts), assessments, and visits for participants. A schematic diagram is highly recommended (see Figure)                                                                                                                                                                                               | ___4, table 1, figure<br>1_____ |
| 37 |                      |     |                                                                                                                                                                                                                                                                                                                                                                                |                                 |
| 38 |                      |     |                                                                                                                                                                                                                                                                                                                                                                                |                                 |
| 39 |                      |     |                                                                                                                                                                                                                                                                                                                                                                                |                                 |
| 40 |                      |     |                                                                                                                                                                                                                                                                                                                                                                                |                                 |
| 41 |                      |     |                                                                                                                                                                                                                                                                                                                                                                                |                                 |
| 42 |                      |     |                                                                                                                                                                                                                                                                                                                                                                                |                                 |
| 43 |                      |     |                                                                                                                                                                                                                                                                                                                                                                                |                                 |
| 44 |                      |     |                                                                                                                                                                                                                                                                                                                                                                                |                                 |
| 45 |                      |     |                                                                                                                                                                                                                                                                                                                                                                                |                                 |
| 46 |                      |     |                                                                                                                                                                                                                                                                                                                                                                                |                                 |
| 47 |                      |     |                                                                                                                                                                                                                                                                                                                                                                                |                                 |
| 48 |                      |     |                                                                                                                                                                                                                                                                                                                                                                                |                                 |
| 49 |                      |     |                                                                                                                                                                                                                                                                                                                                                                                |                                 |

|   |             |    |                                                                                                                                                                                       |          |
|---|-------------|----|---------------------------------------------------------------------------------------------------------------------------------------------------------------------------------------|----------|
| 1 |             |    |                                                                                                                                                                                       |          |
| 2 |             |    |                                                                                                                                                                                       |          |
| 3 | Sample size | 14 | Estimated number of participants needed to achieve study objectives and how it was determined, including clinical and statistical assumptions supporting any sample size calculations | ___13___ |
| 4 |             |    |                                                                                                                                                                                       |          |
| 5 |             |    |                                                                                                                                                                                       |          |
| 6 | Recruitment | 15 | Strategies for achieving adequate participant enrolment to reach target sample size                                                                                                   | ___5___  |
| 7 |             |    |                                                                                                                                                                                       |          |

### 8 **Methods: Assignment of interventions (for controlled trials)**

#### 9 Allocation:

|    |                                  |     |                                                                                                                                                                                                                                                                                                                                                          |           |
|----|----------------------------------|-----|----------------------------------------------------------------------------------------------------------------------------------------------------------------------------------------------------------------------------------------------------------------------------------------------------------------------------------------------------------|-----------|
| 10 |                                  |     |                                                                                                                                                                                                                                                                                                                                                          |           |
| 11 |                                  |     |                                                                                                                                                                                                                                                                                                                                                          |           |
| 12 | Sequence generation              | 16a | Method of generating the allocation sequence (eg, computer-generated random numbers), and list of any factors for stratification. To reduce predictability of a random sequence, details of any planned restriction (eg, blocking) should be provided in a separate document that is unavailable to those who enrol participants or assign interventions | ___7___   |
| 13 |                                  |     |                                                                                                                                                                                                                                                                                                                                                          |           |
| 14 |                                  |     |                                                                                                                                                                                                                                                                                                                                                          |           |
| 15 |                                  |     |                                                                                                                                                                                                                                                                                                                                                          |           |
| 16 |                                  |     |                                                                                                                                                                                                                                                                                                                                                          |           |
| 17 |                                  |     |                                                                                                                                                                                                                                                                                                                                                          |           |
| 18 | Allocation concealment mechanism | 16b | Mechanism of implementing the allocation sequence (eg, central telephone; sequentially numbered, opaque, sealed envelopes), describing any steps to conceal the sequence until interventions are assigned                                                                                                                                                | ___7___   |
| 19 |                                  |     |                                                                                                                                                                                                                                                                                                                                                          |           |
| 20 |                                  |     |                                                                                                                                                                                                                                                                                                                                                          |           |
| 21 |                                  |     |                                                                                                                                                                                                                                                                                                                                                          |           |
| 22 | Implementation                   | 16c | Who will generate the allocation sequence, who will enrol participants, and who will assign participants to interventions                                                                                                                                                                                                                                | ___7___   |
| 23 |                                  |     |                                                                                                                                                                                                                                                                                                                                                          |           |
| 24 |                                  |     |                                                                                                                                                                                                                                                                                                                                                          |           |
| 25 | Blinding (masking)               | 17a | Who will be blinded after assignment to interventions (eg, trial participants, care providers, outcome assessors, data analysts), and how                                                                                                                                                                                                                | ___7-8___ |
| 26 |                                  |     |                                                                                                                                                                                                                                                                                                                                                          |           |
| 27 |                                  |     |                                                                                                                                                                                                                                                                                                                                                          |           |
| 28 |                                  | 17b | If blinded, circumstances under which unblinding is permissible, and procedure for revealing a participant's allocated intervention during the trial                                                                                                                                                                                                     | ___-___   |
| 29 |                                  |     |                                                                                                                                                                                                                                                                                                                                                          |           |
| 30 |                                  |     |                                                                                                                                                                                                                                                                                                                                                          |           |
| 31 |                                  |     |                                                                                                                                                                                                                                                                                                                                                          |           |

### 32 **Methods: Data collection, management, and analysis**

|    |                         |     |                                                                                                                                                                                                                                                                                                                                                                                                              |             |
|----|-------------------------|-----|--------------------------------------------------------------------------------------------------------------------------------------------------------------------------------------------------------------------------------------------------------------------------------------------------------------------------------------------------------------------------------------------------------------|-------------|
| 33 |                         |     |                                                                                                                                                                                                                                                                                                                                                                                                              |             |
| 34 | Data collection methods | 18a | Plans for assessment and collection of outcome, baseline, and other trial data, including any related processes to promote data quality (eg, duplicate measurements, training of assessors) and a description of study instruments (eg, questionnaires, laboratory tests) along with their reliability and validity, if known. Reference to where data collection forms can be found, if not in the protocol | ___10-12___ |
| 35 |                         |     |                                                                                                                                                                                                                                                                                                                                                                                                              |             |
| 36 |                         |     |                                                                                                                                                                                                                                                                                                                                                                                                              |             |
| 37 |                         |     |                                                                                                                                                                                                                                                                                                                                                                                                              |             |
| 38 |                         |     |                                                                                                                                                                                                                                                                                                                                                                                                              |             |
| 39 |                         | 18b | Plans to promote participant retention and complete follow-up, including list of any outcome data to be collected for participants who discontinue or deviate from intervention protocols                                                                                                                                                                                                                    | ___-___     |
| 40 |                         |     |                                                                                                                                                                                                                                                                                                                                                                                                              |             |
| 41 |                         |     |                                                                                                                                                                                                                                                                                                                                                                                                              |             |
| 42 |                         |     |                                                                                                                                                                                                                                                                                                                                                                                                              |             |
| 43 |                         |     |                                                                                                                                                                                                                                                                                                                                                                                                              |             |
| 44 |                         |     |                                                                                                                                                                                                                                                                                                                                                                                                              |             |
| 45 |                         |     |                                                                                                                                                                                                                                                                                                                                                                                                              |             |

1  
2  
3  
4  
5  
6  
7  
8  
9  
10  
11  
12  
13  
14  
15  
16  
17  
18  
19  
20  
21  
22  
23  
24  
25  
26  
27  
28  
29  
30  
31  
32  
33  
34  
35  
36  
37  
38  
39  
40  
41  
42  
43  
44  
45  
46  
47  
48  
49

Data management 19 Plans for data entry, coding, security, and storage, including any related processes to promote data quality (eg, double data entry; range checks for data values). Reference to where details of data management procedures can be found, if not in the protocol \_\_\_\_\_12-13\_\_

Statistical methods 20a Statistical methods for analysing primary and secondary outcomes. Reference to where other details of the statistical analysis plan can be found, if not in the protocol \_\_\_\_\_13-15\_\_

20b Methods for any additional analyses (eg, subgroup and adjusted analyses) \_\_\_\_\_15\_\_

20c Definition of analysis population relating to protocol non-adherence (eg, as randomised analysis), and any statistical methods to handle missing data (eg, multiple imputation) \_\_\_\_\_13-15\_\_

**Methods: Monitoring**

Data monitoring 21a Composition of data monitoring committee (DMC); summary of its role and reporting structure; statement of whether it is independent from the sponsor and competing interests; and reference to where further details about its charter can be found, if not in the protocol. Alternatively, an explanation of why a DMC is not needed \_\_\_\_\_-\_\_\_\_\_

21b Description of any interim analyses and stopping guidelines, including who will have access to these interim results and make the final decision to terminate the trial \_\_\_\_\_-\_\_\_\_\_

Harms 22 Plans for collecting, assessing, reporting, and managing solicited and spontaneously reported adverse events and other unintended effects of trial interventions or trial conduct \_\_\_\_\_11-12\_\_

Auditing 23 Frequency and procedures for auditing trial conduct, if any, and whether the process will be independent from investigators and the sponsor \_\_\_\_\_-\_\_\_\_\_

**Ethics and dissemination**

Research ethics approval 24 Plans for seeking research ethics committee/institutional review board (REC/IRB) approval \_\_\_\_\_15\_\_

Protocol amendments 25 Plans for communicating important protocol modifications (eg, changes to eligibility criteria, outcomes, analyses) to relevant parties (eg, investigators, REC/IRBs, trial participants, trial registries, journals, regulators) \_\_\_\_\_15\_\_

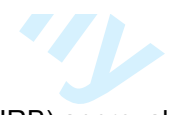

|    |                               |     |                                                                                                                                                                                                                                                                                     |               |
|----|-------------------------------|-----|-------------------------------------------------------------------------------------------------------------------------------------------------------------------------------------------------------------------------------------------------------------------------------------|---------------|
| 1  |                               |     |                                                                                                                                                                                                                                                                                     |               |
| 2  |                               |     |                                                                                                                                                                                                                                                                                     |               |
| 3  | Consent or assent             | 26a | Who will obtain informed consent or assent from potential trial participants or authorised surrogates, and how (see Item 32)                                                                                                                                                        | _____15_____  |
| 4  |                               |     |                                                                                                                                                                                                                                                                                     |               |
| 5  |                               |     |                                                                                                                                                                                                                                                                                     |               |
| 6  |                               | 26b | Additional consent provisions for collection and use of participant data and biological specimens in ancillary studies, if applicable                                                                                                                                               | _____ - _____ |
| 7  |                               |     |                                                                                                                                                                                                                                                                                     |               |
| 8  |                               |     |                                                                                                                                                                                                                                                                                     |               |
| 9  | Confidentiality               | 27  | How personal information about potential and enrolled participants will be collected, shared, and maintained in order to protect confidentiality before, during, and after the trial                                                                                                | _____ - _____ |
| 10 |                               |     |                                                                                                                                                                                                                                                                                     |               |
| 11 |                               |     |                                                                                                                                                                                                                                                                                     |               |
| 12 | Declaration of interests      | 28  | Financial and other competing interests for principal investigators for the overall trial and each study site                                                                                                                                                                       | _____19_____  |
| 13 |                               |     |                                                                                                                                                                                                                                                                                     |               |
| 14 |                               |     |                                                                                                                                                                                                                                                                                     |               |
| 15 | Access to data                | 29  | Statement of who will have access to the final trial dataset, and disclosure of contractual agreements that limit such access for investigators                                                                                                                                     | _____ - _____ |
| 16 |                               |     |                                                                                                                                                                                                                                                                                     |               |
| 17 |                               |     |                                                                                                                                                                                                                                                                                     |               |
| 18 | Ancillary and post-trial care | 30  | Provisions, if any, for ancillary and post-trial care, and for compensation to those who suffer harm from trial participation                                                                                                                                                       | _____ - _____ |
| 19 |                               |     |                                                                                                                                                                                                                                                                                     |               |
| 20 |                               |     |                                                                                                                                                                                                                                                                                     |               |
| 21 | Dissemination policy          | 31a | Plans for investigators and sponsor to communicate trial results to participants, healthcare professionals, the public, and other relevant groups (eg, via publication, reporting in results databases, or other data sharing arrangements), including any publication restrictions | _____16_____  |
| 22 |                               |     |                                                                                                                                                                                                                                                                                     |               |
| 23 |                               |     |                                                                                                                                                                                                                                                                                     |               |
| 24 |                               |     |                                                                                                                                                                                                                                                                                     |               |
| 25 |                               |     |                                                                                                                                                                                                                                                                                     |               |
| 26 |                               | 31b | Authorship eligibility guidelines and any intended use of professional writers                                                                                                                                                                                                      | _____ - _____ |
| 27 |                               |     |                                                                                                                                                                                                                                                                                     |               |
| 28 |                               | 31c | Plans, if any, for granting public access to the full protocol, participant-level dataset, and statistical code                                                                                                                                                                     | _____ - _____ |
| 29 |                               |     |                                                                                                                                                                                                                                                                                     |               |
| 30 | <b>Appendices</b>             |     |                                                                                                                                                                                                                                                                                     |               |
| 31 |                               |     |                                                                                                                                                                                                                                                                                     |               |
| 32 | Informed consent materials    | 32  | Model consent form and other related documentation given to participants and authorised surrogates                                                                                                                                                                                  | _____ - _____ |
| 33 |                               |     |                                                                                                                                                                                                                                                                                     |               |
| 34 |                               |     |                                                                                                                                                                                                                                                                                     |               |
| 35 | Biological specimens          | 33  | Plans for collection, laboratory evaluation, and storage of biological specimens for genetic or molecular analysis in the current trial and for future use in ancillary studies, if applicable                                                                                      | _____ - _____ |
| 36 |                               |     |                                                                                                                                                                                                                                                                                     |               |
| 37 |                               |     |                                                                                                                                                                                                                                                                                     |               |

38 \*It is strongly recommended that this checklist be read in conjunction with the SPIRIT 2013 Explanation & Elaboration for important clarification on the items.  
 39 Amendments to the protocol should be tracked and dated. The SPIRIT checklist is copyrighted by the SPIRIT Group under the Creative Commons  
 40 "[Attribution-NonCommercial-NoDerivs 3.0 Unported](https://creativecommons.org/licenses/by-nc-nd/3.0/)" license.  
 41

# BMJ Open

## Electroacupuncture for treating insomnia in cancer patients: a study protocol for a randomised pilot clinical trial

|                                 |                                                                                                                                                                                                                                                                                                                                                                                                                                                                                                                                                                                                                                                                                                                                                                                    |
|---------------------------------|------------------------------------------------------------------------------------------------------------------------------------------------------------------------------------------------------------------------------------------------------------------------------------------------------------------------------------------------------------------------------------------------------------------------------------------------------------------------------------------------------------------------------------------------------------------------------------------------------------------------------------------------------------------------------------------------------------------------------------------------------------------------------------|
| Journal:                        | <i>BMJ Open</i>                                                                                                                                                                                                                                                                                                                                                                                                                                                                                                                                                                                                                                                                                                                                                                    |
| Manuscript ID                   | bmjopen-2017-016269.R1                                                                                                                                                                                                                                                                                                                                                                                                                                                                                                                                                                                                                                                                                                                                                             |
| Article Type:                   | Protocol                                                                                                                                                                                                                                                                                                                                                                                                                                                                                                                                                                                                                                                                                                                                                                           |
| Date Submitted by the Author:   | 19-Apr-2017                                                                                                                                                                                                                                                                                                                                                                                                                                                                                                                                                                                                                                                                                                                                                                        |
| Complete List of Authors:       | Kim, Mikyung; Korea Institute of Oriental Medicine, Clinical Research Division<br>Kim, Jung Eun; Korea Institute of Oriental Medicine<br>Lee, Hye-Yoon ; Korea Institute of Oriental Medicine, Clinical Research Division<br>Kim, Ae-Ran ; Korea Institute of Oriental Medicine, Clinical Research Division<br>Park, Hyo-Ju; Korea Institute of Oriental Medicine, Clinical Research Division<br>Kwon, O-Jin; Korea Institute of Oriental Medicine, Clinical Research Division<br>Kim, Bo-Kyung ; Dong-eui University, Department of Neuropsychiatry, College of Oriental Medicine<br>Cho, Jung Hyo; Daejeon University, Department of Internal Medicine, College of Traditional Korean Medicine<br>Kim, Joo-Hee; Korea Institute of Oriental Medicine, Clinical Research Division |
| <b>Primary Subject Heading</b>: | Complementary medicine                                                                                                                                                                                                                                                                                                                                                                                                                                                                                                                                                                                                                                                                                                                                                             |
| Secondary Subject Heading:      | Mental health, Oncology                                                                                                                                                                                                                                                                                                                                                                                                                                                                                                                                                                                                                                                                                                                                                            |
| Keywords:                       | insomnia, sleep disturbance, cancer, electroacupuncture, randomised controlled trial                                                                                                                                                                                                                                                                                                                                                                                                                                                                                                                                                                                                                                                                                               |
|                                 |                                                                                                                                                                                                                                                                                                                                                                                                                                                                                                                                                                                                                                                                                                                                                                                    |

SCHOLARONE™  
Manuscripts



# Electroacupuncture for treating insomnia in cancer patients: a study protocol for a randomised pilot clinical trial

Mikyung Kim<sup>1</sup>, Jung-Eun Kim<sup>1</sup>, Hye-Yoon Lee<sup>1</sup>, Ae-Ran Kim<sup>1</sup>, Hyo-Ju Park<sup>1</sup>, O-Jin Kwon<sup>1</sup>, Bo-Kyung Kim<sup>2</sup>, Jung Hyo Cho<sup>3</sup>, Joo-Hee Kim<sup>1\*</sup>

<sup>1</sup> Clinical Research Division, Korea Institute of Oriental Medicine, Daejeon, Republic of Korea

<sup>2</sup> Department of Neuropsychiatry, College of Oriental Medicine, Dong-eui University, Busan, Republic of Korea

<sup>3</sup> Department of Internal Medicine, College of Traditional Korean Medicine, Daejeon University, Daejeon, Republic of Korea

Mikyung Kim: [01mkkim@gmail.com](mailto:01mkkim@gmail.com)

Jung-Eun Kim: [eujuki@gmail.com](mailto:eujuki@gmail.com)

Hye-Yoon Lee: [hyouun@kiom.re.kr](mailto:hyouun@kiom.re.kr)

Ae-Ran Kim: [arkim@kiom.re.kr](mailto:arkim@kiom.re.kr)

Hyo-Ju Park: [mable@kiom.re.kr](mailto:mable@kiom.re.kr)

O-Jin Kwon: [cheda1334@kiom.re.kr](mailto:cheda1334@kiom.re.kr)

Bo-Kyung Kim: [npjolie@hanmail.net](mailto:npjolie@hanmail.net);

Jung Hyo Cho: [choajoa@dju.kr](mailto:choajoa@dju.kr)

Joo-Hee Kim: [jhkim714v@gmail.com](mailto:jhkim714v@gmail.com)

1  
2  
3  
4 \* Correspondence to: Dr Joo-Hee Kim; [jhkim714v@gmail.com](mailto:jhkim714v@gmail.com)  
5

6 - Postal address: 1672 Yuseongdae-ro, Yuseong-gu, Daejeon (34054), Republic of Korea  
7

8 - Telephone number: 82-42-223-4052  
9

10  
11  
12 A full list of author information is available at the end of the article  
13

- 14  
15  
16 ● Word count 5,771 (excluding title page, abstract, references, figures and tables)  
17  
18  
19  
20  
21  
22  
23  
24  
25  
26  
27  
28  
29  
30  
31  
32  
33  
34  
35  
36  
37  
38  
39  
40  
41  
42  
43  
44  
45  
46  
47  
48  
49  
50  
51  
52  
53  
54  
55  
56  
57  
58  
59  
60

## Abstract

**Introduction:** Although insomnia is one of the most prevalent and disturbing symptoms among cancer patients, it has not been properly managed. Electroacupuncture (EA) has received attention as a promising intervention for insomnia, and a few previous studies have reported that this intervention may be beneficial for treating insomnia in cancer patients. The aim of this study is to explore the safety and therapeutic effect of EA on the sleep disturbance of cancer patients with insomnia using a subjective method, patient-reported questionnaires and an objective tool, actigraphy to measure the quality of sleep.

**Methods and analysis:** This is a study protocol for a randomised, three-arm, multi-centre, pilot clinical trial. A total of 45 cancer patients who have continuous insomnia related to cancer treatment or cancer itself will be randomly allocated to an EA group, sham EA group, or usual care group in equal proportions. The EA group will receive 10 sessions of EA treatment over 4 weeks. The sham EA group will receive sham EA at non-acupoints using nonpenetrating Streitberger acupuncture needles with mock EA. The usual care group will not receive EA treatment. All participants will be provided a brochure on the management of sleep disorders regardless of their group assignment. The primary outcome measure is the mean change in the insomnia severity index from the baseline to week 5. Information related to sleep quality will also be obtained through the Pittsburgh Sleep Quality Index, a sleep diary, and actigraphy. Participants will complete the trial by visiting the research centre at week 9 for follow-up assessment.

**Ethics and dissemination:** This study protocol was approved by the institutional review boards of each research centres. Written informed consent will be obtained from all participants. The result of this study will be published in peer-reviewed journals or presented at academic conferences.

**Trial registration number:** Clinical Research Information Service KCT0002162.

## Strengths and limitations of this study

1. This randomised, multi-centre clinical trial is the first study in South Korea exploring the effect and safety of electroacupuncture as a treatment for sleep disturbance in cancer patients with insomnia.
2. In addition to patient-reported outcomes, the study will use actigraphy to acquire objective outcomes reflecting the quality of sleep.
3. The study will measure the levels of cortisol and melatonin in saliva as biomarkers reflecting the circadian rhythm of the body related to sleep and arousal.
4. Polysomnography needs to be included in future research to investigate sleep architecture and the various causes of sleep disorders.
5. Because of the unique nature of electroacupuncture and the design of this study, which includes a usual care group, it is impossible to completely blind the practitioners and all participants.
6. The study adopts nonpenetrating needling at non-acupoints as a sham comparator for acupuncture; however, a perfect placebo intervention for real acupuncture that exerts no physiologic effects while maintaining patient blinding has not been developed yet.

## INTRODUCTION

Insomnia is one of the most common afflictions among the general population, and the prevalence of insomnia is known to be twice as high as in cancer patients compared to healthy adults.<sup>1</sup> Complex interactions of various factors such as adverse reactions to chemotherapy,<sup>1</sup> circadian disruption,<sup>2</sup> inflammation,<sup>3</sup> and tumour growth<sup>3</sup> seem to be the reasons why cancer patients are especially susceptible to insomnia. Insomnia has a profound effect on the overall quality of life,<sup>4</sup> energy,<sup>5</sup> emotion,<sup>6</sup> memory,<sup>7</sup> and immune system<sup>8</sup> of cancer patients. In addition, insomnia is also known to be associated with decreased survival<sup>9</sup> and tumour worsening.<sup>10</sup> Although insomnia is such a common and important problem among cancer patients, it is not easily cured or well managed.<sup>1 11</sup>

The most commonly used therapy for the management of insomnia in cancer patients is pharmacotherapy.<sup>12</sup> According to Moore et al., approximately half of breast cancer patients are prescribed sleeping pills.<sup>13</sup> Long-term use of sleeping pills is known to be associated with continued sleep disturbance, decreased ability to perform daily activities, memory impairment, traffic accidents, falls, etc.<sup>12</sup> Thus, pharmacotherapy should be used only for a short-term period; however, approximately 30% of cancer patients are receiving sleeping pills even one year after the end of chemotherapy.<sup>13</sup>

In addition to pharmacotherapy, cognitive behavioural therapy has been recommended as a standard therapy for the improvement of insomnia.<sup>3</sup> However, there are some limitations to this therapy in that the compliance rate to the therapy is low because the therapeutic response does not appear immediately, and patient access to the therapy is low due to the high cost of the therapy.<sup>14</sup> Moreover, experienced therapists are rare, and the effect of therapy varies widely depending on the proficiency of the therapist.<sup>14</sup>

For this reason, there is a growing demand for complementary alternative medicine (CAM) in the field of sleep management. Acupuncture is one of the most commonly used therapeutic interventions in CAM. Acupuncture is a treatment that punctures and stimulates the skin at acupoints using specialised needles. Electroacupuncture (EA) refers to a method that supplies a constant physical stimulus to acupoints through the inserted acupuncture needle connected to a microcurrent stimulator.

Previous systematic reviews on the effect of acupuncture for insomnia have revealed that

1  
2  
3  
4 acupuncture is significantly more effective to improve sleep disturbance in insomniacs than  
5 no treatment<sup>15</sup> and sham acupuncture.<sup>15-17</sup> Insomnia has also been reported to be as effective  
6 as pharmacotherapy<sup>15</sup> or even superior to sleeping pills<sup>15,17</sup> and provides additional benefit to  
7 patients who are undergoing pharmacotherapy to improve insomnia.<sup>15,16</sup>  
8  
9

10  
11 The effect of acupuncture for the improvement of sleep disorders has also been identified in  
12 studies targeting cancer patients. A survey conducted at a major cancer centre in the United  
13 States showed that acupuncture significantly improved the quality of sleep in cancer  
14 patients.<sup>18</sup> Garland et al. also determined that 8-week EA was more effective than  
15 pharmacotherapy to attenuate sleep disturbance from a recently published randomised  
16 controlled trial including breast cancer patients suffering from hot flush.<sup>19</sup> Choi et al.  
17 systematically investigated the clinical studies on the effect of acupuncture for insomnia in  
18 cancer patients and indicated that acupuncture may be superior to sham acupuncture or  
19 pharmacotherapy.<sup>20</sup> However, these authors could not draw any firm conclusions because the  
20 level of evidence in the included studies was low overall, the effect size of the studies was too  
21 small to confirm their clinical significance, and there were few studies strictly designed and  
22 performed.<sup>20</sup>  
23  
24  
25  
26  
27  
28  
29  
30

31  
32 Subjective measurement tools such as self-reported questionnaires or sleep diaries are the  
33 most commonly used type of outcome measures for the assessment of sleep quality. This is  
34 because these tools are relatively simple to measure and have the advantage of not interfering  
35 with daily life or sleeping; however, one limitation of this approach is that the results of these  
36 measurements are entirely up to the decisions of participants and are unable to objectively  
37 measure the pattern of sleep.<sup>21</sup> Polysomnography and actigraphy are the two main methods to  
38 objectively measure sleep quality.<sup>21</sup>  
39  
40  
41  
42  
43

44 Polysomnography is a gold standard method for the objective measurement of sleep,<sup>3,21</sup>  
45 because it can demonstrate the sleep structure and the cause of sleep disorders in various  
46 ways including electroencephalogram, electromyogram, electrocardiogram, respiration and  
47 oxygen saturation, etc.<sup>22</sup> However, one disadvantage is that polysomnography requires an  
48 expensive device and an expert capable of interpreting the results.<sup>21</sup>  
49  
50  
51  
52

53 To overcome these shortcomings, actigraphy has been investigated.<sup>23</sup> Actigraphy is a  
54 noninvasive means of measuring the motion of the body using an actigraph, a piezoelectric  
55  
56

1  
2  
3  
4 accelerometer.<sup>23</sup> Actigraphy has been widely used in the field of sleep research because it can  
5 detect sleep, activity, and movement without disturbing the daily lives of the subjects who are  
6 only required to wear a small, watch-shaped device on the wrist.<sup>23</sup> Studies on the similarities  
7 and differences between the sleep quality measured by polysomnography, actigraphy, and  
8 subjective assessment tools have been published.<sup>23</sup> It is recommended to use both objective  
9 and subjective measurement methods to assess sleep quality in the field of sleep research.<sup>24</sup>  
10  
11  
12  
13

14 A few acupuncture researchers have reported the positive effect of acupuncture using  
15 objective measurement tools such as polysomnography<sup>25-27</sup> or actigraphy.<sup>28 29</sup> However, there  
16 remain conflicting results regarding whether acupuncture has the same effect on both  
17 subjective and objective aspects of sleep. Some researchers argued that the effect of  
18 acupuncture was approved via both objective and subjective measurement tools<sup>25-27</sup>, while  
19 others reported that acupuncture seemed to affect the subjective outcomes only, not the result  
20 of polysomnography<sup>30 31</sup> or actigraphy.<sup>32-34</sup>  
21  
22  
23  
24  
25  
26

27 The aim of this study is to explore the therapeutic effect and safety of EA on the sleep  
28 disturbance of cancer patients with insomnia using both subjective questionnaires and  
29 objective actigraphy.  
30  
31  
32  
33  
34  
35  
36  
37  
38  
39  
40  
41  
42  
43  
44  
45  
46  
47  
48  
49  
50  
51  
52  
53  
54  
55  
56  
57  
58  
59  
60





Laboratory test<sup>b</sup> X X

EA, Electroacupuncture; ISI, Insomnia Severity Inventory; PSQI, Pittsburgh Sleep Quality Index; FACT-F, Functional Assessment of Cancer Therapy-Fatigue; MoCA, The Montreal Cognitive Assessment; BDSS, Blood Deficiency Scoring System.

<sup>a</sup>Only EA and sham EA groups will undergo blinding and credibility tests.

<sup>b</sup>The laboratory test includes complete blood count and differential count, absolute neutrophil count, aspartate aminotransferase, alanine aminotransferase, total bilirubin, blood urea nitrogen, creatinine, albumin, erythrocyte sedimentation rate, thyroid-stimulating hormone, free thyroxine, and human chorionic gonadotropin urine test (only for women in their childbearing years at the screening visit).

## Recruitment

Two clinical research centres in South Korea will conduct this trial: Daejeon Oriental Hospital of Daejeon University and Dong-eui University Korean Medical Hospital in Busan. We will do our best to secure enough participants in this study using online and offline advertisement boards inside and outside the hospitals and by releasing flyers to daily local newspapers.

## Inclusion criteria

1. Patients aged 19 years or over but under 80 years
2. An Eastern Cooperative Oncology Group (ECOG) performance status  $\leq 2$
3. Cessation of cancer-related treatments (e.g., surgery, radiotherapy, chemotherapy, immunotherapy) at least 12 weeks before the trial (ongoing hormone therapy, which must have been initiated at least 3 weeks prior to enrolment, is allowed)
4. Continuous insomnia related to cancer treatment or cancer itself for at least 3 months, with fulfilment of The Diagnostic and Statistical Manual of Mental Disorders, Fifth Edition (DSM-5) diagnostic criteria for insomnia disorder
5. Total score in the Insomnia Severity Index (ISI)  $\geq 15$  points

1  
2  
3  
4 6. Willingness to participate in the trial and having provided written consent  
5  
6  
7

## 8 **Exclusion criteria**

9

- 10  
11 1. Having experienced the current level of sleep disorder prior to the diagnosis of cancer  
12  
13 2. Severe anaemia (platelet count < 60,000/ $\mu$ L, haemoglobin < 8 g/dL, or absolute neutrophil  
14 count < 1,000/ $\mu$ L)  
15  
16 3. A diagnosis of major depressive disorder, anxiety disorder, panic disorder, or other  
17 psychiatric disorder; caffeine, alcohol, or drug addiction; or a subscale of either anxiety or  
18 depression in Hamilton Anxiety and Depression Scale (HADS) score  $\geq$  11 points  
19  
20 4. Level of cancer pain measured by the numeric rating scale  $\geq$  4  
21  
22 5. An estimated life expectancy of six months or less  
23  
24 6. A plan for surgery, chemotherapy, or radiotherapy during the study  
25  
26 7. A recent change of regular medication to alleviate insomnia within 4 weeks of the  
27 beginning of the trial  
28  
29 8. Having taken sleeping pills as required within 2 weeks of the beginning of the trial  
30  
31 9. Having undergone Korean medical treatment (e.g., acupuncture, moxibustion, cupping,  
32 herbal medicine) within 4 weeks of the beginning of the trial  
33  
34 10. Initiation or a change in dietary supplement regimen or non-pharmacologic therapies (e.g.,  
35 cognitive behavioural therapy, exercise, etc.) for alleviating insomnia during the trial or  
36 within 4 weeks of the beginning of the trial  
37  
38 11. Working shifts or changes in day/night work schedule that could impact circadian rhythm  
39  
40 12. Suffering from pain severe enough to cause sleep disturbance or presence of any disease  
41 that could cause insomnia  
42  
43 13. Taking haemostatic agents (e.g., Greenmono, Advate, Monoclate-P, Facnyne, BeneFix)  
44 because of haemostatic disorders  
45  
46  
47  
48  
49  
50  
51  
52  
53  
54  
55  
56  
57  
58  
59  
60

1  
2  
3  
4 14. Abnormal findings in thyroid function test (abnormal level of free thyroxine [free T4] and  
5 thyroid stimulating hormone [TSH] < 0.1 µIU/ml or TSH > 5.1 µIU/ml)  
6

7  
8 15. History of hypersensitivity reactions to acupuncture or inability to cooperate with  
9 acupuncture therapy  
10

11 16. The presence of implants that could interfere with EA or a history of hypersensitivity  
12 reactions to electrostimulation  
13

14 17. Pregnancy, lactation, or planning to become pregnant  
15

16 18. Having participated in other clinical trials within 4 weeks of the beginning of the trial  
17

18 19. Difficulty complying with the study protocol  
19  
20  
21  
22  
23  
24  
25  
26  
27

## 28 **Randomisation and allocation concealment**

29 Fifteen subjects will be allocated to each group according to a randomisation schedule  
30 generated by an independent statistician using SAS (Version 9.4, SAS institute Inc., Cary,  
31 NC). A stratified randomisation method will be used with the research centre and the standard  
32 therapies for insomnia (regular sleep medications or cognitive behavioural therapy for  
33 insomnia) as stratification factors. The statistician will seal the randomisation codes in  
34 sequentially numbered opaque envelopes and send them to the research centres. These  
35 envelopes will be kept in double-locked cabinets at the centres. Each envelope will be opened  
36 by a practitioner to assign the participant to one of the three groups after acquiring informed  
37 consent and eligibility screening.  
38  
39  
40  
41  
42  
43  
44  
45  
46  
47  
48  
49

## 50 **Blinding**

51 Participant blinding will be limited to the participants in the EA and sham EA groups.  
52 Complete participant blinding is not possible because the subjects in the usual care group  
53  
54  
55  
56  
57  
58  
59  
60

cannot help but notice their allocated group. Practitioner blinding cannot be achieved because of the unique nature of EA treatment. The assessor blinding will be maintained by separating the staff members who perform EA and who measure the outcomes.

## Interventions

All participants of this trial will be educated with a brochure on the management of sleep disorders regardless of the assigned groups.

### EA group

Participants in the EA group will receive acupuncture treatment at GV20, EX-HN3, bilateral HT7, PC6, BL63, and KI4 using sterilised stainless steel acupuncture needles (Asiamed GmbH & Co., 0.25 × 25 mm) (Figure 2). In addition to these 10 acupoints, up to 4 more points can be optionally added according to the symptoms of the patients. If participants with lymphatic oedema refuse to be treated with the acupoints on the affected site, the acupoints near the oedema site can be omitted. After inducing *deqi* by twisting the acupuncture needles, electric stimulation using an EA device (ES-160, Ito Co Ltd, Tokyo, Japan) will be applied with a 4-Hz frequency, at an intensity that the participant can notice but feel comfortable with. The EA treatment will be performed for 30 min per time, with a total of 10 times over 4 weeks. This regimen was decided by consensus among experts traditional Korean medicine based on previous research.<sup>15-20 25-29 31 32 34</sup> Details of the EA treatment based on the standards for reporting interventions in clinical trials of the acupuncture checklist are tabulated in Supplementary File 1.

### Sham EA group

Participants in the sham EA group will receive sham acupuncture using nonpenetrating Streitberger acupuncture needles (Asiamed GmbH & Co.). Unlike the real acupuncture needle that is inserted into the skin, the tip of the Streitberger acupuncture needle is so blunt that it cannot penetrate the skin. The needles will be fixed by medical skin tape on the skin at

1  
2  
3  
4 non-acupoints unrelated to the management of sleep disorders in Korean traditional medicine  
5 as follows: upper limb 1 (1 cm lateral and 5 cm proximal points from cubital creases of  
6 bilateral arms); upper limb 2 (2 cm above the upper limb 1 point); lower limb 1 (1.5 cm  
7 above the depression at the midpoint of the upper border of the bilateral patella); lower limb 2  
8 (area 1/3 above the medial part of the bilateral tibia); and lower limb 3 (1.5 cm above the  
9 lower limb 2 point). The same EA device will be applied to the Streitberger acupuncture  
10 needles, with an identical beeping sound and light signals as for the EA group. However, the  
11 electric current will not be delivered.  
12  
13  
14  
15  
16

### 17 18 **Usual care group**

19  
20 Participants in the usual care group will not receive EA treatment. These subjects will  
21 maintain the usual treatment and self-care but cannot begin any additional treatment to  
22 improve their insomnia during the study period.  
23  
24  
25  
26  
27  
28  
29  
30

### 31 **Prohibited and permitted concomitant treatment**

32  
33  
34 The participants will be prohibited from any Korean traditional medical treatment such as  
35 acupuncture, moxibustion, cupping, or herbal drugs to attenuate their insomnia symptoms  
36 except for the EA provided by the trial. If the participants remained on regular medication to  
37 improve insomnia at least 4 weeks prior to the beginning of the trial, they will be allowed to  
38 maintain the medication. However, if the type or dosage of the sleeping pill is changed during  
39 the trial, the subjects will be withdrawn from the study. If the subjects are receiving standard  
40 nonpharmacological treatment, such as cognitive behavioural therapy, or taking any dietary  
41 supplements to attenuate insomnia from at least 4 weeks prior to the beginning of the trial,  
42 they will be allowed to maintain these treatments. However, their regimens cannot be  
43 changed during the trial.  
44  
45  
46  
47  
48  
49  
50

51  
52 The participants will be trained to report all treatments newly received after the beginning of  
53 the trial to the staff members, and their treatment history will be recorded on the case report  
54 form (CRF). When participants are found to have received a prohibited treatment during the  
55  
56

1  
2  
3  
4 study period, they will be withdrawn from the trial. Despite withdrawal from the trial, the  
5 recordings of the participants will continue if the subjects have already randomised. To  
6 realise the intention-to-treat principle, the data from the withdrawn participants will also be  
7 included in the analysis set and recorded in the results.  
8  
9  
10

## 11 12 13 14 15 16 17 **Outcomes**

### 18 19 **Primary outcome measure**

20  
21 The primary outcome measure of this study will be the mean change in the ISI from the  
22 baseline to the end of the 4-week intervention. The ISI is a 7-item questionnaire devised to  
23 diagnose and assess the severity of the insomnia. The total score of the ISI ranges from 0 to  
24 28 points, and it can categorise insomniacs according to scores of 0–7 (no clinically  
25 significant insomnia), 8–14 (subthreshold insomnia), 15–21 (clinical insomnia, moderate  
26 severity), and 22–28 (clinical insomnia, severe).<sup>35</sup> The Korean version of the ISI validated by  
27 Cho et al. will be used in this study.<sup>36</sup>  
28  
29  
30  
31  
32

### 33 34 **Secondary outcome measures**

35  
36 The secondary outcome measures of this study will include the mean changes in the total  
37 score of the ISI from baseline to week 3 and week 9 and changes in the scores of the  
38 Pittsburgh Sleep Quality Index (PSQI), Functional Assessment of Cancer Therapy-Fatigue  
39 (FACT-F), and Montreal Cognitive Assessment (MoCA); the level of the salivary hormones  
40 including cortisol and melatonin; and the quality of sleep measured by a sleep diary and  
41 actigraphy before and after the intervention.  
42  
43  
44  
45

46 The PSQI is a self-reported questionnaire to assess the quality of sleep over the past month.  
47 This scale comprises of 7 components including subjective sleep quality, sleep latency, sleep  
48 duration, sleep efficiency, sleep disturbances, use of sleeping pills, and daytime dysfunction.  
49 The global PSQI score ranges from 0 to 21, and a higher score represents poorer quality of  
50 sleep.<sup>37</sup> The Korean version of the PSQI validated by Sohn et al. will be used in this study.<sup>38</sup>  
51  
52  
53  
54  
55  
56  
57  
58  
59  
60

1  
2  
3  
4 The change of the global score in the PSQI will be assessed at baseline, week 3, week 5, and  
5 week 9.  
6

7  
8 The FACT-F is a questionnaire devised to determine the level of fatigue of cancer patients.  
9 This instrument consists of the FACT-general (G) and the fatigue subscale. The FACT-G is  
10 composed of 27 items in 4 domains including physical well-being, social/family well-being,  
11 emotional well-being, and functional well-being. The fatigue subscale has 13 items assessing  
12 the level of fatigue. The total score of the FACT-F ranges from 0 to 160, where higher points  
13 denote a higher level of fatigue that disturbs the daily life of the patients.<sup>39</sup> Lee et al.  
14 validated the Korean version of the FACT-G.<sup>40</sup> Jeong et al. have translated and validated the  
15 Korean version of the fatigue subscale and also used it with Lee's Korean version of the  
16 FACT-G among patients with cancer-related fatigue.<sup>41</sup> In other words, the Korean version of  
17 the complete FACT-F has been used to measure the level of fatigue among cancer patients in  
18 Korea.<sup>41</sup> FACT-F scores will be assessed at baseline and week 5.  
19  
20  
21  
22  
23  
24  
25

26  
27 The MoCA is a one-page, 30-point test originally devised to screen for mild cognitive  
28 impairment in the geriatric population and can also be applied to evaluate the level of  
29 cognition of cancer survivors.<sup>42</sup> The validated Korean version of the MoCA will be used in  
30 this study.<sup>43</sup> The MoCA will be assessed at baseline and week 5 by the assessors who will be  
31 blinded to the group allocation  
32  
33  
34  
35

36 The change in the level of cortisol and melatonin in saliva will be measured before and after  
37 the intervention. These levels are known to reflect the circadian rhythm of the human body.  
38 The level of cortisol usually surges in the morning, while melatonin release increases at night  
39 in normal conditions, and the constant change of these hormones is known to be closely  
40 related to arousal and sleep.<sup>44 45</sup> We will check whether this type of rhythmical change in  
41 these hormones differs before and after the intervention.  
42  
43  
44  
45

46 To understand the details of the sleep status of the participants, a sleep diary will be provided  
47 to each participant. The subjects will be educated to write down their bedtime, final  
48 awakening time, sleep latency, number and duration of awakenings, perceived sleep duration,  
49 midday nap, and use of sleeping pills throughout the study period.<sup>46</sup>  
50  
51  
52  
53  
54  
55  
56  
57  
58  
59  
60

1  
2  
3  
4 To objectively measure the sleep patterns of the participants, actigraphy will be used in this  
5 trial. The candidate participants will wear a watch-type, physical activity monitoring device  
6 (ActiGraph™ wGT3X-BT, MTI Health Services Company, Pensacola, FL, USA) on their  
7 nondominant wrists for at least one week during the screening period. The subjects who meet  
8 all eligibility criteria will keep wearing the device during the 4 weeks of the intervention  
9 period to record their sleep and activity. Using this method, we can acquire objective data on  
10 the participants' sleep quality including the total time in bed, sleep latency, wake after sleep  
11 onset, total sleep time, and sleep efficiency.<sup>23</sup>  
12  
13  
14  
15  
16

### 17 **Blinding test and credibility test**

18  
19  
20 The participants in the EA and sham EA groups will participate in the blinding test and  
21 credibility test after the first and last treatments. The purpose of these tests is to check  
22 whether the participant blinding was maintained for these groups. The blinding test will ask  
23 the participants which type of acupuncture they think has been received, real EA, sham EA,  
24 or unknown. The credibility test assesses the level of confidence in the treatment they have  
25 received. The score of this test ranges from 0 to 6, where a higher score reflects higher  
26 confidence in the treatment.<sup>47</sup>  
27  
28  
29  
30  
31

### 32 **Safety assessment**

33  
34  
35 For the safety assessment, the investigators will ask the participants on each visit if they have  
36 experienced any adverse events (AE). Laboratory tests will also be performed at baseline and  
37 week 5 to detect AEs. This test includes a complete blood count and differential count,  
38 absolute neutrophil count, aspartate aminotransferase, alanine aminotransferase, total  
39 bilirubin, blood urea nitrogen, creatinine, albumin, erythrocyte sedimentation rate, thyroid-  
40 stimulating hormone, free thyroxine, and human chorionic gonadotropin urine tests (only for  
41 women in their childbearing years at the screening visit).  
42  
43  
44  
45  
46

47 The severity of AEs will be primarily assessed according to the National Cancer Institute  
48 Common Terminology Criteria for Adverse Events (NCI-CTCAE) version 4.0.<sup>48</sup> When the  
49 NCI-CTCAE is not applicable, Spilker's three level criteria will be used instead.<sup>49</sup> The type of  
50 AE and its severity will be recorded to the CRF regardless of the relationship with the  
51 intervention provided in this study. The relationship between the treatment and the AE will be  
52  
53  
54  
55  
56



1  
2  
3  
4 recorded as definitely related, probably related, possibly related, probably not related,  
5 definitely not related, or unknown.  
6

### 7 8 **Study feasibility outcomes** 9

10 To see whether a full-scale randomised clinical trial for this issue is feasible, the recruitment  
11 rate and completion rate will be calculated. The overall rate of adherence to the planned  
12 intervention will also be ascertained.  
13  
14

### 15 16 17 18 19 20 21 **Data collection and management** 22

23 Data will be collected after acquiring the signed consent from the participants. The collected  
24 data will be recorded on the CRF by certificated clinical research coordinators. The whole  
25 process of the trial will be regularly monitored to ensure the quality of the trial. Periodic  
26 monitoring will confirm that the data in the CRF match the source document and that the  
27 procedures of the recruitment, intervention and assessment follow the protocol.  
28  
29

30 To guarantee the consistency of the procedures of the intervention and assessment between  
31 research centres, a standard operating procedure will be set and provided to the investigators.  
32 The practitioners are limited to licensed doctors of Korean medicine who have at least 2 years  
33 of clinical experience, and all investigators are required to take training courses for good  
34 clinical practice.  
35  
36

37 To promote participant retention and prevent follow-up loss, the researchers will make phone  
38 calls to participants prior to follow-up sessions. We will also inquire the participants failing to  
39 attend follow-up or treatment sessions about the reasons for absence and encourage  
40 compliance by telephone.  
41  
42

### 43 44 45 46 47 48 49 50 51 **Sample size** 52 53 54 55 56

1  
2  
3  
4 The purpose of this pilot clinical trial is to explore the potential efficacy and safety of EA for  
5 insomnia in cancer patients. Therefore, a prospective sample size calculation was not  
6 performed. The result of this study will serve as the basis for sample size calculation for a  
7 full-scale trial on this theme in the future. An opinion from an expert in medical statistics  
8 recommended that the minimal number of people per group be 12 for a pilot study,<sup>50</sup> and  
9 assuming a dropout rate of 20%, 15 participants in each group or a total of 45 participants  
10 will be deemed appropriate for this research setting.  
11  
12  
13  
14  
15  
16  
17  
18  
19  
20

## 21 **Statistical analysis**

22  
23  
24  
25 A full analysis set (FAS), which realises the intention-to-treat ideal as closely as possible,<sup>51</sup>  
26 will be the main set for primary analysis. The FAS includes all participants initially allocated  
27 to one of the three groups of the study; however, it excludes the data from participants who  
28 do not meet the eligibility criteria, who never received the intervention in this study, or who  
29 never provided any outcome value in this study. A per-protocol (PP) set will be used for  
30 sensitivity analysis to compare the results from the FAS. The PP set comprises the  
31 participants who completed the trial without major violation of the protocol, with having  
32 received at least 70% of the planned intervention and provided all outcome values.  
33  
34  
35  
36  
37

38  
39 A two-sided significance level will be set at 5%, and the multiple imputation method will be  
40 adopted for missing data. SAS® Version 9.4 (SAS institute. Inc., Cary, NC) will be used for  
41 statistical analysis.  
42  
43

44 Demographic characteristics and baseline measurements of the variables of each group will  
45 be summarised. Continuous data will be expressed as the mean  $\pm$  standard deviation. Analysis  
46 of variance (ANOVA) or the Kruskal–Wallis test will performed to compare the continuous  
47 data from each group. A 95% confidence interval can be presented as needed. For  
48 dichotomous or categorical data, frequency and percentile will be presented, and the  
49 difference between groups will be compared using a chi-square test or the Fisher's exact test.  
50  
51  
52  
53  
54  
55  
56  
57  
58  
59  
60

1  
2  
3  
4 The mean change of the ISI score from baseline to week 5 is the primary outcome measure of  
5 this study. To identify statistically significant differences in the primary outcome measure  
6 between groups, two sets of hypotheses are assumed as described below.  
7  
8  
9

10  
11  
12 Set 1

13  
14 The null hypothesis ( $H_{01}$ ): There is no difference in the mean change of the ISI before and after  
15 treatment between the EA group and the usual care group.  
16

17 The alternative hypothesis ( $H_{11}$ ): There is a difference in the mean change of the ISI before and after  
18 treatment between the EA group and the usual care group.  
19

20  
21  
22 Set 2

23  
24 The null hypothesis ( $H_{02}$ ): There is no difference in the mean change of the ISI before and after  
25 treatment between the EA group and the sham EA group.  
26

27  
28 The alternative hypothesis ( $H_{12}$ ): There is a difference in the mean change of the ISI before and after  
29 treatment between the EA group and the sham EA group.  
30

31  
32  
33  
34 If  $H_{01}$  is rejected and  $H_{11}$  is adopted in the statistical analysis for set 1, the test for the  
35 hypotheses of set 2 will be verified. However, if  $H_{01}$  is adopted in the test for the set 1  
36 hypotheses, no further validation for the set 2 hypotheses will be required.  
37

38  
39  
40 To validate the hypotheses, an analysis of covariance (ANCOVA) will be performed with the  
41 baseline value as a covariate and each group as a fixed factor. If there is any significant  
42 difference between groups among the demographic characteristics or baseline measurements  
43 of the variables, it will be adjusted according to its covariance. The problem of multiple  
44 comparison will be solved using the fixed sequence method.<sup>52</sup>  
45  
46  
47

48  
49 The secondary outcome measures will be analysed via the same methods used for the primary  
50 outcome measure analysis. The change of the outcome measures before and after the  
51 intervention within a group will be analysed using Student's paired t-test or Wilcoxon signed-  
52 rank test. Repeated measures ANOVA with post-hoc Dunnett's procedure will be used to  
53 validate the differences in the trends per visit.  
54  
55  
56

1  
2  
3  
4 Subgroup analysis will be conducted to determine whether the severity of insomnia,  
5 significant blood deficiency pattern according to a blood deficiency scoring system, or level  
6 of expectancy to the EA treatment at baseline affects the clinical response to EA. The  
7 correlation of the sleep-related variables extracted from an objective source (actigraphy) and  
8 a subjective source (patient-reported questionnaires) will be evaluated.  
9  
10  
11  
12  
13  
14  
15  
16  
17  
18  
19

## 20 **Ethics and dissemination**

21  
22 Licensed doctors of Korean medicine will obtain informed consent at each research centre.  
23 Only the participants who sign the informed consent form will be included in the study. The  
24 study protocol has been approved by the institutional review boards (IRBs) of the  
25 participating research centres; Daejeon Oriental Hospital of Daejeon University and Dong-eui  
26 University Korean Medical Hospital in Busan. The approved protocol was registered with the  
27 Clinical Research Information Service (CRIS) of South Korea (CRIS-KCT0002162).  
28  
29  
30  
31

32 Any modification to the protocol will be re-approved by the IRBs, documented in the online  
33 registry of CRIS, and reflected in the explanation for the participants. An amended consent  
34 form reflecting the revised protocol must be obtained from the participants.  
35  
36  
37

38 The result of this study will be published in peer-reviewed journals or academic conferences.  
39  
40  
41  
42  
43  
44  
45

## 46 **DISCUSSION**

47  
48 Despite the high prevalence and enormous impact of insomnia in cancer patients, its  
49 importance has been overlooked.<sup>1</sup> The National Cancer Institute and National Comprehensive  
50 Cancer Network have strongly recommended evaluation and appropriate treatment of the  
51 sleep disturbance of cancer survivors during routine survivorship care.<sup>11</sup> Nevertheless, it  
52 seems that most hospitals and cancer centres are not properly managing the insomnia of  
53  
54  
55  
56  
57  
58  
59  
60

1  
2  
3  
4 cancer patients.<sup>11</sup>  
5

6  
7  
8  
9  
10  
11  
12  
13  
14  
15  
16  
17  
18  
19  
20  
21  
22  
23  
24  
25  
26  
27  
28  
29  
30  
31  
32  
33  
34  
35  
36  
37  
38  
39  
40  
41  
42  
43  
44  
45  
46  
47  
48  
49  
50  
51  
52  
53  
54  
55  
56  
57  
58  
59  
60  
Insomnia is one of the areas in which acupuncture-related publications have been most commonly focused for the last 20 years.<sup>53</sup> Previous researches have shown that acupuncture is an effective intervention for insomnia. Acupuncture also appears to be effective for the sleep disorders of cancer patients, but its effect on the cancer population has been studied relatively less than in general insomniacs. Thus, we expect that the results of this study will contribute to increasing the insufficient evidence in this area of research.

Reviewing previous studies, we found that acupuncture may have only a short-term effect on the insomnia of cancer patients. Mao et al. reported that the sleep quality of the EA group was significantly better than that of control group immediately after an 8-week intervention period, but this difference between groups disappeared after 4 weeks.<sup>54</sup> Another study by Otte et al. also showed a similar pattern that the effect of a 2-week acupuncture treatment vanished after a 4-week follow-up period.<sup>28</sup>

However, according to the opinion of Choi et al., the effect of acupuncture seems to be strengthened over time.<sup>20</sup> These authors found that acupuncture was as good as conventional therapy and became better at follow-up visits 3 weeks after final treatment.<sup>20</sup> We will record the trend change of the effect of EA over time by assessing the response of the participants at baseline; week 3, a midpoint of the 4-week intervention; week 5, immediately after the end of the final intervention; and week 9, the final follow-up assessment. We expect the results of this study to contribute to solving the disagreement among the existing studies on the timing and duration of the effect of acupuncture on sleep disturbance in cancer patients.

In addition to time duration, there are many factors that can influence the effectiveness of acupuncture. Among them, we will try to determine whether a certain pattern identified according to the theory of Korean traditional medicine, blood deficiency, is an important variable that can affect the response to acupuncture. Blood deficiency is one of the main patterns of insomnia in Korean traditional medicine, and this study will investigate how many patients are categorised with a blood deficiency pattern using a blood deficiency scoring system<sup>55</sup> and whether their treatment response is different from that of the non-blood deficiency group.

1  
2  
3  
4 In insomnia clinical trials, the placebo effect is very commonly observed.<sup>56</sup> The  
5 characteristics of insomnia—that it is intermittent and tends to maintain or even reinforce the  
6 therapeutic effect of specific treatment over long periods—seems to explain such a placebo  
7 effect.<sup>56</sup> This is the reason why the inclusion of a placebo control is generally recommended  
8 in insomnia clinical trials.<sup>56</sup> Thus, this study also included a sham EA group as a placebo  
9 control.

10  
11  
12  
13  
14 The sham EA group will receive sham acupuncture therapy at non-acupoints unrelated to  
15 insomnia using a Streitberger acupuncture needle. This sham needle was devised by  
16 Streitberger and Kleinhenz in 1998.<sup>57</sup> Its appearance is the same as real acupuncture needles,  
17 but the needle does not penetrate the skin. The suitability of this device as a placebo  
18 comparator for acupuncture needles has been validated,<sup>57</sup> and it has been used as a control  
19 intervention in several acupuncture clinical studies.<sup>58</sup>

20  
21  
22  
23  
24  
25 The Streitberger acupuncture needle is one of the two most commonly used and  
26 commercially available placebo devices in acupuncture clinical studies along with the Park  
27 sham device.<sup>58</sup> Nevertheless, approximately half of the clinical studies using these sham  
28 devices have concluded that the effects of real acupuncture and sham needles were not  
29 significantly different.<sup>58</sup> Generally, a placebo pill is used on the assumption that it has no  
30 pharmacological effect and is harmless.<sup>59</sup> However, it has been shown in many studies to date  
31 that sham acupuncture needles seem to have a significant physiological effect.<sup>59</sup> Thus, the  
32 development of a new placebo device as a perfect comparator for real acupuncture that has no  
33 physiologic effects while maintaining patient blinding is still a significant challenge for  
34 acupuncture researchers. However, we currently have no choice but to use one of these  
35 available sham devices while considering their limitations.

36  
37  
38  
39  
40  
41  
42  
43  
44 It is known that the proportion of the placebo effect is not inconsiderable in acupuncture  
45 treatment.<sup>59</sup> Moreover, as we have seen, patients with insomnia tend to respond strongly to  
46 placebo treatment. In addition, the response to sham acupuncture such as the skin sensation of  
47 pressure or tingling, may be akin to the response to acupressure, which is also known to be  
48 effective for insomnia.<sup>16</sup> Thus, a study design that directly compares acupuncture and sham  
49 acupuncture is likely to produce a false negative result, failing to detect the whole  
50 characteristic effect of acupuncture.<sup>59</sup> Therefore, we designed a three-arm parallel study  
51  
52  
53  
54  
55

1  
2  
3  
4 including the usual care group as well as a sham control group.  
5

6 The strength of this study is that it will acquire objective outcomes reflecting sleep quality  
7 and the related circadian rhythm. First, we will obtain both subjective and objective outcomes  
8 showing sleep quality using patient-reported questionnaires and actigraphy. Most of the  
9 acupuncture studies on insomnia have used only patient-reported outcomes; furthermore,  
10 even a small number of studies using objective outcomes such as polysomnography or  
11 actigraphy failed to show consistent results on the effect of acupuncture for each outcome.<sup>30-</sup>  
12

13 <sup>34</sup> Based on the results of this study, we expect that we will be able to compare the difference  
14 between the subjective and objective outcomes and contribute to solving the conflict on this  
15 issue. Only actigraphy is used for objective outcome measures at this time; however,  
16 polysomnography, a gold standard method for insomnia diagnosis, should be included in  
17 future research.  
18

19  
20  
21  
22  
23  
24  
25 Second, the difference in the levels of cortisol and melatonin in saliva between the groups  
26 will be compared as biomarkers reflecting the circadian rhythm of the body that affects the  
27 pattern of sleep. It is known that acupuncture modulates various neurotransmitters and  
28 hormones such as endorphin, serotonin, norepinephrine, cortisol and melatonin.<sup>44 45</sup> Among  
29 them, changes of the cortisol surge in the morning or melatonin increase at night time are  
30 known to be closely related to arousal and sleep.<sup>44 45</sup> Previous studies have reported that  
31 acupuncture can improve insomnia by affecting the pattern of cortisol<sup>60 61</sup> or melatonin<sup>27</sup>  
32 release. Based on these results, we will investigate the changes in salivary cortisol and  
33 melatonin in addition to the sleep quality of the participants.  
34  
35  
36  
37  
38  
39  
40  
41  
42

### 43 **Trial status**

44 This trial is currently recruiting participants.  
45  
46  
47  
48  
49

### 50 **Author affiliations**

51  
52 <sup>1</sup> Clinical Research Division, Korea Institute of Oriental Medicine, Daejeon, Republic of  
53 Korea  
54

55 <sup>2</sup> Department of Neuropsychiatry, College of Oriental Medicine, Dong-eui University, Busan,  
56

1  
2  
3  
4 Republic of Korea

5 <sup>3</sup>Department of Internal Medicine, College of Traditional Korean Medicine, Daejeon  
6 University, Daejeon, Republic of Korea  
7  
8  
9

## 10 **Contributors**

11  
12 MK and JHK conceived the study. MK drafted the protocol. JEK, HYL, ARK, and HJP  
13 participated in the design of the study and contributed to the refinement of the protocol. OJK  
14 was responsible for the statistical design of the study. BKK and JHC provided clinical advice  
15 and made critical revisions. JHK is a principal investigator of the study and has the final  
16 responsibility for the decision to submit this manuscript for publication. All authors approved  
17 the final manuscript.  
18  
19  
20  
21

## 22 **Funding**

23  
24 This work was supported by the Korea Institute of Oriental Medicine (grant number K16122  
25 & K17122).  
26  
27

## 28 **Competing interests**

29  
30 None declared.  
31

## 32 **Patient consent**

33  
34 Will be obtained.  
35  
36

## 37 **Ethics approval**

38  
39 Daejeon Oriental Hospital of Daejeon University IRB (djomc-140-1); Dong-eui University  
40 Korean Medical Hospital IRB (2016-04)  
41  
42

## 43 **Provenance and peer review**

44  
45 Not commissioned; this study was peer reviewed for ethics and funding approval prior to  
46 submission.  
47  
48

## 49 **Data sharing statement**

50  
51 Data requested for public purposes or research transparency will be provided (please  
52 contact the corresponding author).  
53  
54  
55  
56



## REFERENCES

1. Savard J, Morin CM. Insomnia in the context of cancer: a review of a neglected problem. *J Clin Oncol* 2001;**19**(3):895-908.
2. Beck SL, Berger AM, Barsevick AM, et al. Sleep quality after initial chemotherapy for breast cancer. *Support Care Cancer* 2010;**18**(6):679-89.
3. Fiorentino L, Ancoli-Israel S. Sleep dysfunction in patients with cancer. *Curr Treat Options Neurol* 2007;**9**(5):337-46.
4. Lis CG, Gupta D, Grutsch JF. The relationship between insomnia and patient satisfaction with quality of life in cancer. *Support Care Cancer* 2008;**16**(3):261-6.
5. Bower JE, Ganz PA, Irwin MR, et al. Inflammation and behavioral symptoms after breast cancer treatment: do fatigue, depression, and sleep disturbance share a common underlying mechanism? *J Clin Oncol* 2011;**29**(26):3517-22.
6. Sharma N, Hansen CH, O'connor M, et al. Sleep problems in cancer patients: prevalence and association with distress and pain. *Psycho-Oncology* 2012;**21**(9):1003-9.
7. Jean-Pierre P, Grandner MA, Garland SN, et al. Self-reported memory problems in adult-onset cancer survivors: effects of cardiovascular disease and insomnia. *Sleep Med* 2015;**16**(7):845-9.
8. Payne J, Piper B, Rabinowitz I, et al. Biomarkers, fatigue, sleep, and depressive symptoms in women with breast cancer: a pilot study. *Oncol Nurs Forum* 2006;**33**(4):775-83.
9. Innominato PF, Focan C, Gorlia T, et al. Circadian rhythm in rest and activity: a biological correlate of quality of life and a predictor of survival in patients with metastatic colorectal cancer. *Cancer Res* 2009;**69**(11):4700-7.
10. Cash E, Sephton S, Chagpar A, et al. Circadian disruption and biomarkers of tumor progression in breast cancer patients awaiting surgery. *Brain Behav Immun* 2015;**48**:102-14.
11. Zhou ES, Partridge AH, Syrjala KL, et al. Evaluation and treatment of insomnia in adult cancer survivorship programs. *J Cancer Surviv* 2017;**11**(1):74-9.
12. Garland SN, Gehrman P, Barg FK, et al. CHOosing Options for Insomnia in Cancer Effectively (CHOICE): Design of a patient centered comparative effectiveness trial of acupuncture and cognitive behavior therapy for insomnia. *Contemp Clin Trials* 2016;**47**:349-55.
13. Moore TA, Berger AM, Dizona P. Sleep aid use during and following breast cancer adjuvant chemotherapy. *Psycho-Oncology* 2011;**20**(3):321-5.
14. Espie CA, MacMahon K, Kelly H, et al. Randomized clinical effectiveness trial of nurse-administered small-group cognitive behavior therapy for persistent insomnia in general practice. *Sleep* 2007;**30**(5):574.
15. Cao H, Pan X, Li H, et al. Acupuncture for treatment of insomnia: a systematic review of randomized controlled trials. *J Altern Complement Med* 2009;**15**(11):1171-86.

16. Cheuk DK, Yeung WF, Chung K, et al. Acupuncture for insomnia. *Cochrane Database Syst Rev* 2012;**12**(9):CD005472.
17. Shergis JL, Ni X, Jackson ML, et al. A systematic review of acupuncture for sleep quality in people with insomnia. *Complement Ther Med* 2016;**26**:11-20.
18. Garcia MK, Cohen L, Spano M, et al. Inpatient Acupuncture at a Major Cancer Center. *Integr Cancer Ther* 2016:1534735416685403.
19. Garland SN, Xie SX, Li Q, et al. Comparative effectiveness of electro-acupuncture versus gabapentin for sleep disturbances in breast cancer survivors with hot flashes: a randomized trial. *Menopause* 2016.
20. Choi TY, Kim JI, Lim HJ, et al. Acupuncture for Managing Cancer-Related Insomnia: A Systematic Review of Randomized Clinical Trials. *Integr Cancer Ther* 2016.
21. Krystal AD, Edinger JD. Measuring sleep quality. *Sleep Med* 2008;**9**:S10-7.
22. Lovin PA, Ehrenpreis AB. The role of polysomnography in the differential diagnosis of chronic insomnia. *Am J Psychiatry* 1988;**145**:346-9.
23. Sadeh A, Hauri PJ, Kripke DF, et al. The role of actigraphy in the evaluation of sleep disorders. *Sleep* 1995;**18**(4):288-302.
24. Zhang L, Zhao Z-X. Objective and subjective measures for sleep disorders. *Neurosci Bull* 2007;**23**(4):236-40.
25. Hachul H, Garcia TK, Maciel AL, et al. Acupuncture improves sleep in postmenopause in a randomized, double-blind, placebo-controlled study. *Climacteric* 2013;**16**(1):36-40.
26. Ruan JW, Wang CH, Liao XX, et al. Electroacupuncture treatment of chronic insomniacs. *Chin Med J* 2009;**122**(23):2869-73.
27. Spence DW, Kayumov L, Chen A, et al. Acupuncture increases nocturnal melatonin secretion and reduces insomnia and anxiety: a preliminary report. *J Neuropsychiatry Clin Neurosci* 2004;**16**(1):19-28.
28. Otte JL, Carpenter JS, Zhong X, et al. Feasibility study of acupuncture for reducing sleep disturbances and hot flashes in post-menopausal breast cancer survivors. *Clin Nurse Spec* 2011;**25**(5):228.
29. Yeung W-F, Chung K-F, Zhang S-P, et al. Electroacupuncture for primary insomnia: a randomized controlled trial. *Sleep* 2009;**32**(8):1039-47.
30. Hwang EH. Effects of hand acupuncture therapy on sleep quality in sleep disrupted adults: verification by polysomnography and cerebral blood flow test. *Taehan Kanho Hakhoe chi* 2007;**37**(7):1108-18.
31. Kaiser-Pagliarini T, Hachul H, Maciel A, et al. Acupuncture in insomnia and its consequences in postmenopausal women. *Sleep Med* 2009;**10**:S18.
32. Chung K, Yeung W, Zhang S, et al. Acupuncture for persistent insomnia associated with major depressive disorder: a randomised controlled trial. *Hong Kong Med J* 2016;**22**(Suppl2):S9-

- 1  
2  
3  
4  
5  
6  
7  
8  
9  
10  
11  
12  
13  
14  
15  
16  
17  
18  
19  
20  
21  
22  
23  
24  
25  
26  
27  
28  
29  
30  
31  
32  
33  
34  
35  
36  
37  
38  
39  
40  
41  
42  
43  
44  
45  
46  
47  
48  
49  
50  
51  
52  
53  
54  
55  
56  
57  
58  
59  
60
- 14.
33. Chung K-F, Yeung W-F, Yu Y-M, et al. Acupuncture for residual insomnia associated with major depressive disorder: a placebo-and sham-controlled, subject-and assessor-blind, randomized trial. *J Clin Psychiatry* 2015;**76**(6):e752-60.
34. Yeung W-F, Chung K-F, Tso K-C, et al. Electroacupuncture for residual insomnia associated with major depressive disorder: a randomized controlled trial. *Sleep* 2011;**34**(6):807-15.
35. Morin CM, Belleville G, Bédanger L, et al. The Insomnia Severity Index: psychometric indicators to detect insomnia cases and evaluate treatment response. *Sleep* 2011;**34**(5):601-8.
36. Cho YW, Song ML, Morin CM. Validation of a Korean version of the insomnia severity index. *J Clin Neurol* 2014;**10**(3):210-5.
37. Buysse DJ, Reynolds CF, Monk TH, et al. The Pittsburgh Sleep Quality Index: a new instrument for psychiatric practice and research. *Psychiatry Res* 1989;**28**(2):193-213.
38. Sohn SI, Kim DH, Lee MY, et al. The reliability and validity of the Korean version of the Pittsburgh Sleep Quality Index. *Sleep Breath* 2012;**16**(3):803-12.
39. Yellen SB, Cella DF, Webster K, et al. Measuring fatigue and other anemia-related symptoms with the Functional Assessment of Cancer Therapy (FACT) measurement system. *J Pain Symptom Manage* 1997;**13**(2):63-74.
40. Lee EH, Chun M, Kang S, et al. Validation of the Functional Assessment of Cancer Therapy-General (FACT-G) scale for measuring the health-related quality of life in Korean women with breast cancer. *Jpn J Clin Oncol* 2004;**34**(7):393-9.
41. Jeong JS, Ryu BH, Kim JS, et al. Bojungikki-tang for cancer-related fatigue: a pilot randomized clinical trial. *Integr Cancer Ther* 2010;**9**(4):331-8.
42. Arcuri GG, Palladini L, Dumas G, et al. Exploring the measurement properties of the Montreal Cognitive Assessment in a population of people with cancer. *Support Care Cancer* 2015;**23**(9):2779-87.
43. Lee JY, Dong Woo L, Cho SJ, et al. Brief screening for mild cognitive impairment in elderly outpatient clinic: validation of the Korean version of the Montreal Cognitive Assessment. *J Geriatr Psychiatry Neurol* 2008;**21**(2):104-10.
44. Huang W, Kutner N, Bliwise DL. Autonomic activation in insomnia: the case for acupuncture. *J Clin Sleep Med* 2011;**7**(1):95-102.
45. Zhao K. Acupuncture for the treatment of insomnia. *Int Rev Neurobiol* 2013;**111**:217-34.
46. Carney CE, Buysse DJ, Ancoli-Israel S, et al. The consensus sleep diary: standardizing prospective sleep self-monitoring. *Sleep* 2012;**35**(2):287-302.
47. Devilly GJ, Borkovec TD. Psychometric properties of the credibility/expectancy questionnaire. *J Behav Ther Exp Psychiatry* 2000;**31**(2):73-86.
48. US department of Health and Human Services. National Institutes of Health, National Cancer Institute: National Institutes of Health (2009) Common terminology criteria for adverse

- 1  
2  
3  
4 events (CTCAE) version 4.0. NIH Publication No. 03-5410.  
5 [https://evs.nci.nih.gov/ftp1/CTCAE/CTCAE\\_4.03\\_2010-06-14\\_QuickReference\\_5x7.pdf](https://evs.nci.nih.gov/ftp1/CTCAE/CTCAE_4.03_2010-06-14_QuickReference_5x7.pdf)  
6 (accessed 19 Jan 2017).  
7  
8  
9 49. Spilker B. *Quality of life and pharmacoeconomics in clinical trials*. 2nd ed. Philadelphia:  
10 Lippencott-Raven, 1995.  
11  
12 50. Julious SA. Sample size of 12 per group rule of thumb for a pilot study. *Pharm Stat*  
13 2005;**4**(4):287-91.  
14  
15 51. European Medicines Agency: ICH Topic E9. Statistical principles for clinical trials.  
16 [http://www.ema.europa.eu/docs/en\\_GB/document\\_library/Scientific\\_guideline/2009/09/WC5](http://www.ema.europa.eu/docs/en_GB/document_library/Scientific_guideline/2009/09/WC50002928.pdf)  
17 [00002928.pdf](http://www.ema.europa.eu/docs/en_GB/document_library/Scientific_guideline/2009/09/WC50002928.pdf) (accessed 19 Jan 2017).  
18  
19 52. Wiens BL. A fixed sequence Bonferroni procedure for testing multiple endpoints. *Pharm Stat*  
20 2003;**2**(3):211-5.  
21  
22 53. Ma Y, Dong M, Zhou K, et al. Publication Trends in Acupuncture Research: A 20-Year  
23 Bibliometric Analysis Based on PubMed. *PLoS One* 2016;**11**(12):e0168123.  
24  
25 54. Mao JJ, Farrar JT, Bruner D, et al. Electroacupuncture for fatigue, sleep, and psychological  
26 distress in breast cancer patients with aromatase inhibitor-related arthralgia: A randomized  
27 trial. *Cancer* 2014;**120**(23):3744-51.  
28  
29 55. Terasawa KT. *Kampo diagnosis of western medical doctor*. Seoul: Jipmundang, 1998.  
30  
31 56. Perlis ML, McCall WV, Jungquist CR, et al. Placebo effects in primary insomnia. *Sleep Med Rev*  
32 2005;**9**(5):381-9.  
33  
34 57. Kleinhenz J, Streitberger K, Windeler J, et al. Randomised clinical trial comparing the effects of  
35 acupuncture and a newly designed placebo needle in rotator cuff tendinitis. *Pain*  
36 1999;**83**(2):235-41.  
37  
38 58. Zhang CS, Tan HY, Zhang GS, et al. Placebo devices as effective control methods in  
39 acupuncture clinical trials: a systematic review. *PLoS One* 2015;**10**(11):e0140825.  
40  
41 59. Paterson C, Dieppe P. Characteristic and incidental (placebo) effects in complex interventions  
42 such as acupuncture. *BMJ* 2005;**330**(7501):1202.  
43  
44 60. Akimoto T, Nakahori C, Aizawa K, et al. Acupuncture and responses of immunologic and  
45 endocrine markers during competition. *Med Sci Sports Exerc* 2003;**35**(8):1296-302.  
46  
47 61. Liu S, Zhou W, Ruan X, et al. Activation of the hypothalamus characterizes the response to  
48 acupuncture stimulation in heroin addicts. *Neurosci Lett* 2007;**421**(3):203-8.  
49  
50  
51  
52  
53  
54  
55  
56  
57  
58  
59  
60

1  
2  
3  
4 **Table** (in the main text)  
5  
6

7 **Table 1** Schedule of enrolment, interventions, and assessments  
8  
9

10  
11 **Figure titles**  
12

13  
14 **Figure 1** Flow diagram of the study  
15

16  
17 **Figure 2** The points used for the electroacupuncture group  
18  
19

20  
21  
22 **Supplementary file**  
23  
24

25 **Supplementary File 1** Details of the electroacupuncture (EA) and sham EA treatment based  
26 on the Standards for Reporting Interventions in Clinical Trials of Acupuncture (STRICTA)  
27 checklist  
28  
29  
30  
31  
32  
33  
34  
35  
36  
37  
38  
39  
40  
41  
42  
43  
44  
45  
46  
47  
48  
49  
50  
51  
52  
53  
54  
55  
56  
57  
58  
59  
60

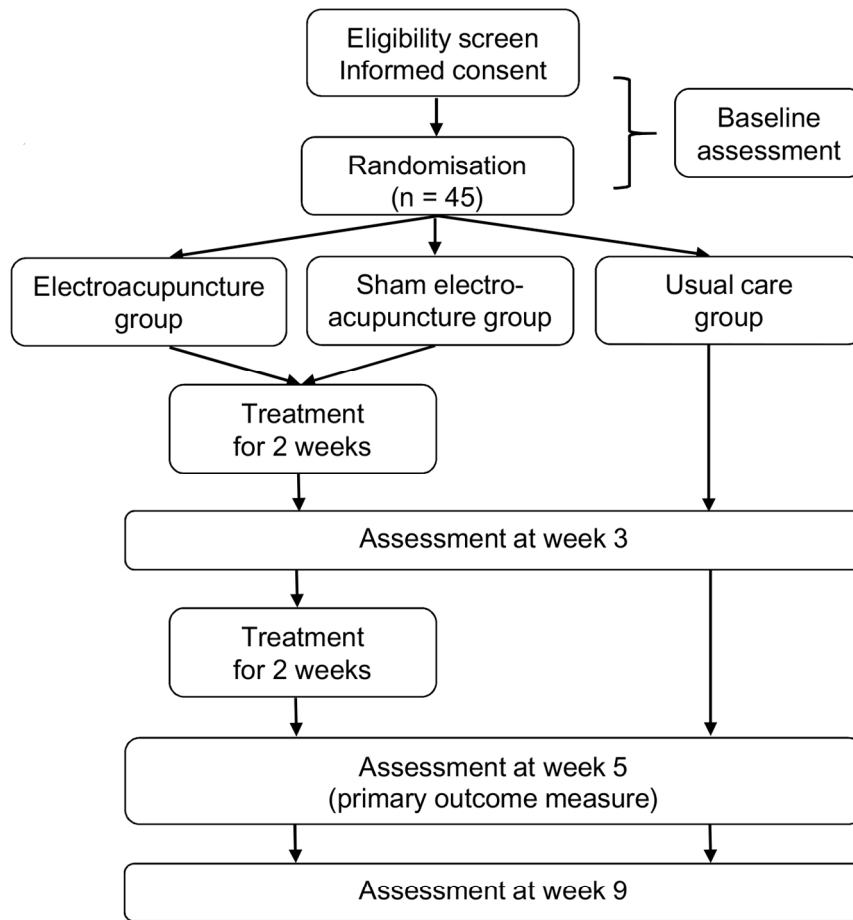

Figure 1 Flow diagram of the study

137x141mm (300 x 300 DPI)

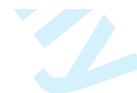

1  
2  
3  
4  
5  
6  
7  
8  
9  
10  
11  
12  
13  
14  
15  
16  
17  
18  
19  
20  
21  
22  
23  
24  
25  
26  
27  
28  
29  
30  
31  
32  
33  
34  
35  
36  
37  
38  
39  
40  
41  
42  
43  
44  
45  
46  
47  
48  
49  
50  
51  
52  
53  
54  
55  
56  
57  
58  
59  
60

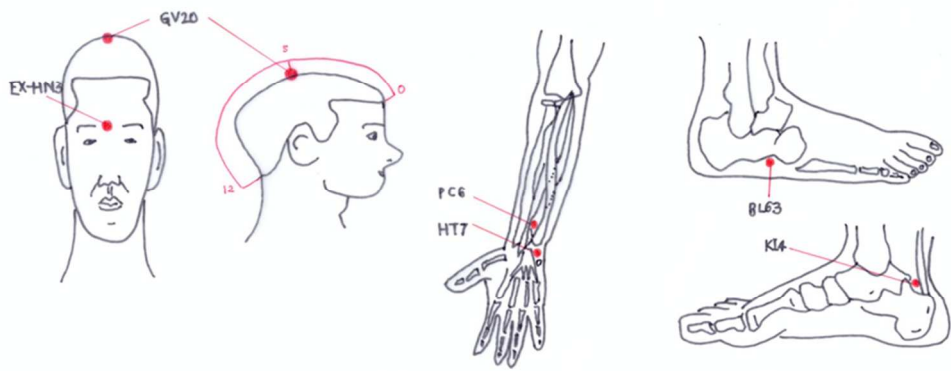

Figure 2 The points used for the electroacupuncture group

73x31mm (300 x 300 DPI)

Peer review only

**Supplementary file 1** Details of the electroacupuncture (EA) and sham EA treatments based on the Standards for Reporting Interventions in Clinical Trials of Acupuncture (STRICTA) checklist

| Item                                          | Detail                                                                                                                                               | Description                                                                                                                                                                                                                                                                                                                                                                                                                                                                                                                                                 |
|-----------------------------------------------|------------------------------------------------------------------------------------------------------------------------------------------------------|-------------------------------------------------------------------------------------------------------------------------------------------------------------------------------------------------------------------------------------------------------------------------------------------------------------------------------------------------------------------------------------------------------------------------------------------------------------------------------------------------------------------------------------------------------------|
| <b>1. Acupuncture rationale</b>               | 1a) Style of acupuncture                                                                                                                             | Electroacupuncture based on traditional Korean acupuncture                                                                                                                                                                                                                                                                                                                                                                                                                                                                                                  |
|                                               | 1b) Reasoning for treatment provided, based on historical context, literature sources, and/or consensus methods, with references where appropriate   | Related papers <sup>15-20,25-29,31-34</sup> and expert (doctors of Korean medicine) consensus                                                                                                                                                                                                                                                                                                                                                                                                                                                               |
|                                               | 1c) Extent to which treatment was varied                                                                                                             | Standardized treatment (option: up to 2 bilateral acupoints can be added according to the chief complaints of the participants)                                                                                                                                                                                                                                                                                                                                                                                                                             |
| <b>2. Details of needling</b>                 | 2a) Number of needle insertions per subject per session                                                                                              | Standardized regimen: 10 (10 to 14, when considering addition of optional acupoints)                                                                                                                                                                                                                                                                                                                                                                                                                                                                        |
|                                               | 2b) Names of points used                                                                                                                             | GV 20, EX-HN-3, bilateral HT7, PC6, BL63, KI4                                                                                                                                                                                                                                                                                                                                                                                                                                                                                                               |
|                                               | 2c) Depth of insertion, based on a specified unit of measurement, or on a particular tissue level                                                    | 0.6 – 4.5 cm                                                                                                                                                                                                                                                                                                                                                                                                                                                                                                                                                |
|                                               | 2d) Response sought                                                                                                                                  | Acupuncture: <i>de qi</i> (sense of soreness, numbness, heaviness, or distension)<br>EA: cognition of stimulation and comfortable feeling                                                                                                                                                                                                                                                                                                                                                                                                                   |
|                                               | 2e) Needle stimulation                                                                                                                               | Manual stimulation: twisting-needling 3-5 times<br>Electrical stimulation: 4 Hz                                                                                                                                                                                                                                                                                                                                                                                                                                                                             |
|                                               | 2f) Needle retention time                                                                                                                            | 30 minutes                                                                                                                                                                                                                                                                                                                                                                                                                                                                                                                                                  |
|                                               | 2g) Needle type (diameter, length, and manufacturer or material)                                                                                     | Acupuncture (diameter: 0.25 mm, length: 25 mm, manufacturer: Asiamed GmbH & Co., material: sterilized stainless steel)                                                                                                                                                                                                                                                                                                                                                                                                                                      |
| <b>3. Treatment regimen</b>                   | 3a) Number of treatment sessions                                                                                                                     | 10                                                                                                                                                                                                                                                                                                                                                                                                                                                                                                                                                          |
|                                               | 3b) Frequency and duration of treatment sessions                                                                                                     | 10 sessions for 4 weeks (average 2.5 times per week)                                                                                                                                                                                                                                                                                                                                                                                                                                                                                                        |
| <b>4. Other components of treatment</b>       | 4a) Details of other interventions administered to the acupuncture group                                                                             | - All the three groups will be educated with a brochure about the management of sleep disorder<br>- No additional Korean traditional medical treatment regarding insomnia is allowed except for what is given for the study<br>- The interventions other than Korean traditional medical treatment to manage insomnia that have been steadily received for more than 4 weeks before the screening visit are allowed to continue during the study, but no additional treatment is allowed after the beginning of the trial (even sleeping pills are allowed) |
|                                               | 4b) Setting and context of treatment, including instructions to practitioners, and information and explanations to patients                          | - Setting: clinical trial centers in university hospitals<br>- Unnecessary conversation will be limited between the acupuncturists and patients during the treatment.                                                                                                                                                                                                                                                                                                                                                                                       |
| <b>5. Practitioner background</b>             | 5) Description of participating acupuncturists (qualification or professional affiliation, years in acupuncture practice, other relevant experience) | Licensed Korean medical doctors with at least 2 years of clinical experience                                                                                                                                                                                                                                                                                                                                                                                                                                                                                |
| <b>6. Control or comparator interventions</b> | 6a) Rationale for the control or comparator in the context of the research question, with sources that justify this choice                           | Sham acupuncture: previous researches validating the nonpenetrating sham acupuncture device, Streitberger acupuncture needle <sup>52</sup><br>Mock electroacupuncture: previous researches with control intervention with no electrical stimulation with beeping sound and lighting <sup>29,32-34,49</sup>                                                                                                                                                                                                                                                  |



1  
2  
3  
4  
5  
6  
7  
8  
9  
10  
11  
12  
13  
14  
15  
16  
17  
18  
19  
20  
21  
22  
23  
24  
25  
26  
27  
28  
29  
30  
31  
32  
33  
34  
35  
36  
37  
38  
39  
40  
41  
42  
43  
44  
45  
46  
47  
48  
49  
50  
51  
52  
53  
54  
55  
56  
57  
58  
59  
60

|  |                                                                                                                                                                                    |                                                                                                                                                                                                                                                                                                                                                                                                                                                                                                                                                                                                                                                                                                                                                                                                                                                                                                                                                                            |
|--|------------------------------------------------------------------------------------------------------------------------------------------------------------------------------------|----------------------------------------------------------------------------------------------------------------------------------------------------------------------------------------------------------------------------------------------------------------------------------------------------------------------------------------------------------------------------------------------------------------------------------------------------------------------------------------------------------------------------------------------------------------------------------------------------------------------------------------------------------------------------------------------------------------------------------------------------------------------------------------------------------------------------------------------------------------------------------------------------------------------------------------------------------------------------|
|  | <p>6b) Precise description of the control or comparator. If sham acupuncture or any other type of acupuncture-like control is used, provide details as for Items 1 to 3 above.</p> | <p>1. rationale of sham acupuncture<br/>Use non-penetrating Streitberger acupuncture needles at 10 non-acupoints and connect electrostimulator in switch-off state on to the needles</p> <p>2. points used for sham EA</p> <ul style="list-style-type: none"> <li>- Upper limb 1: 1 cm lateral and 5 cm proximal points from cubital creases of bilateral arms</li> <li>- Upper limb 2: 2 cm above the upper limb 1 point</li> <li>- Lower limb 1: 1.5 cm above the depression at the midpoint of the upper border of the bilateral patella</li> <li>- Lower limb 2: area 1/3 above the medial part of the bilateral tibia</li> <li>- Lower limb 3: 1.5 cm above the lower limb 2 point</li> </ul> <p>3. number of needle insertions per subject per session: 10</p> <p>4. needle type<br/>Sham acupuncture (Streitberger needle, Asiamed GmbH &amp; Co., sterilized stainless steel)</p> <p>5. Treatment duration, frequency, period: the same as the treatment group</p> |
|--|------------------------------------------------------------------------------------------------------------------------------------------------------------------------------------|----------------------------------------------------------------------------------------------------------------------------------------------------------------------------------------------------------------------------------------------------------------------------------------------------------------------------------------------------------------------------------------------------------------------------------------------------------------------------------------------------------------------------------------------------------------------------------------------------------------------------------------------------------------------------------------------------------------------------------------------------------------------------------------------------------------------------------------------------------------------------------------------------------------------------------------------------------------------------|

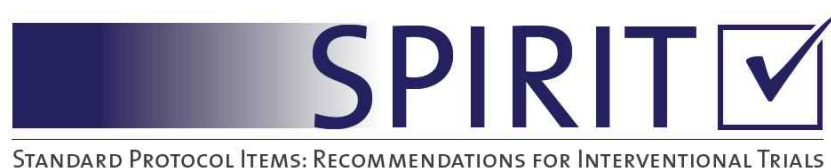

SPIRIT 2013 Checklist: Recommended items to address in a clinical trial protocol and related documents\*

| Section/item                      | Item No | Description                                                                                                                                                                                                                                                                              | Addressed on page number         |
|-----------------------------------|---------|------------------------------------------------------------------------------------------------------------------------------------------------------------------------------------------------------------------------------------------------------------------------------------------|----------------------------------|
| <b>Administrative information</b> |         |                                                                                                                                                                                                                                                                                          |                                  |
| Title                             | 1       | Descriptive title identifying the study design, population, interventions, and, if applicable, trial acronym                                                                                                                                                                             | ___title page___                 |
| Trial registration                | 2a      | Trial identifier and registry name. If not yet registered, name of intended registry                                                                                                                                                                                                     | _at the end of the abstract_____ |
|                                   | 2b      | All items from the World Health Organization Trial Registration Data Set                                                                                                                                                                                                                 | _____ - _____                    |
| Protocol version                  | 3       | Date and version identifier                                                                                                                                                                                                                                                              | _____ - _____                    |
| Funding                           | 4       | Sources and types of financial, material, and other support                                                                                                                                                                                                                              | _____24_____                     |
| Roles and responsibilities        | 5a      | Names, affiliations, and roles of protocol contributors                                                                                                                                                                                                                                  | _____24_____                     |
|                                   | 5b      | Name and contact information for the trial sponsor                                                                                                                                                                                                                                       | _____ - _____                    |
|                                   | 5c      | Role of study sponsor and funders, if any, in study design; collection, management, analysis, and interpretation of data; writing of the report; and the decision to submit the report for publication, including whether they will have ultimate authority over any of these activities | _____ - _____                    |
|                                   | 5d      | Composition, roles, and responsibilities of the coordinating centre, steering committee, endpoint adjudication committee, data management team, and other individuals or groups overseeing the trial, if applicable (see Item 21a for data monitoring committee)                         | _____ - _____                    |

|    |                                                           |     |                                                                                                               |                      |
|----|-----------------------------------------------------------|-----|---------------------------------------------------------------------------------------------------------------|----------------------|
| 1  | <b>Introduction</b>                                       |     |                                                                                                               |                      |
| 2  |                                                           |     |                                                                                                               |                      |
| 3  | Background and                                            | 6a  | Description of research question and justification for undertaking the trial, including summary of relevant   | _____ 5-7 _____      |
| 4  | rationale                                                 |     | studies (published and unpublished) examining benefits and harms for each intervention                        |                      |
| 5  |                                                           |     |                                                                                                               |                      |
| 6  |                                                           | 6b  | Explanation for choice of comparators                                                                         | _____ 12-13 _____    |
| 7  |                                                           |     |                                                                                                               |                      |
| 8  | Objectives                                                | 7   | Specific objectives or hypotheses                                                                             | _____ 7,19 _____     |
| 9  |                                                           |     |                                                                                                               |                      |
| 10 | Trial design                                              | 8   | Description of trial design including type of trial (eg, parallel group, crossover, factorial, single group), |                      |
| 11 |                                                           |     | allocation ratio, and framework (eg, superiority, equivalence, noninferiority, exploratory)                   | _____ 8 _____        |
| 12 |                                                           |     |                                                                                                               |                      |
| 13 |                                                           |     |                                                                                                               |                      |
| 14 | <b>Methods: Participants, interventions, and outcomes</b> |     |                                                                                                               |                      |
| 15 |                                                           |     |                                                                                                               |                      |
| 16 | Study setting                                             | 9   | Description of study settings (eg, community clinic, academic hospital) and list of countries where data will | _____ 9 _____        |
| 17 |                                                           |     | be collected. Reference to where list of study sites can be obtained                                          |                      |
| 18 |                                                           |     |                                                                                                               |                      |
| 19 | Eligibility criteria                                      | 10  | Inclusion and exclusion criteria for participants. If applicable, eligibility criteria for study centres and  | _____ 9-11, 17 _____ |
| 20 |                                                           |     | individuals who will perform the interventions (eg, surgeons, psychotherapists)                               |                      |
| 21 |                                                           |     |                                                                                                               |                      |
| 22 | Interventions                                             | 11a | Interventions for each group with sufficient detail to allow replication, including how and when they will be | _____ 12- _____      |
| 23 |                                                           |     | administered                                                                                                  | 13 _____             |
| 24 |                                                           | 11b | Criteria for discontinuing or modifying allocated interventions for a given trial participant (eg, drug dose  | _____ 13- _____      |
| 25 |                                                           |     | change in response to harms, participant request, or improving/worsening disease)                             | 14 _____             |
| 26 |                                                           | 11c | Strategies to improve adherence to intervention protocols, and any procedures for monitoring adherence        | _____ - _____        |
| 27 |                                                           |     | (eg, drug tablet return, laboratory tests)                                                                    |                      |
| 28 |                                                           | 11d | Relevant concomitant care and interventions that are permitted or prohibited during the trial                 | _____ 13- _____      |
| 29 |                                                           |     |                                                                                                               | 14 _____             |
| 30 | Outcomes                                                  | 12  | Primary, secondary, and other outcomes, including the specific measurement variable (eg, systolic blood       | _____ 14-16 _____    |
| 31 |                                                           |     | pressure), analysis metric (eg, change from baseline, final value, time to event), method of aggregation (eg, |                      |
| 32 |                                                           |     | median, proportion), and time point for each outcome. Explanation of the clinical relevance of chosen         |                      |
| 33 |                                                           |     | efficacy and harm outcomes is strongly recommended                                                            |                      |
| 34 |                                                           |     |                                                                                                               |                      |
| 35 |                                                           |     |                                                                                                               |                      |
| 36 |                                                           |     |                                                                                                               |                      |
| 37 |                                                           |     |                                                                                                               |                      |
| 38 |                                                           |     |                                                                                                               |                      |
| 39 |                                                           |     |                                                                                                               |                      |
| 40 |                                                           |     |                                                                                                               |                      |
| 41 |                                                           |     |                                                                                                               |                      |
| 42 |                                                           |     |                                                                                                               |                      |
| 43 |                                                           |     |                                                                                                               |                      |
| 44 |                                                           |     |                                                                                                               |                      |
| 45 |                                                           |     |                                                                                                               |                      |
| 46 |                                                           |     |                                                                                                               |                      |
| 47 |                                                           |     |                                                                                                               |                      |

|   |                      |    |                                                                                                                                                                                       |                          |
|---|----------------------|----|---------------------------------------------------------------------------------------------------------------------------------------------------------------------------------------|--------------------------|
| 1 | Participant timeline | 13 | Time schedule of enrolment, interventions (including any run-ins and washouts), assessments, and visits for participants. A schematic diagram is highly recommended (see Figure)      | __8, table 1, figure 1__ |
| 2 |                      |    |                                                                                                                                                                                       |                          |
| 3 |                      |    |                                                                                                                                                                                       |                          |
| 4 | Sample size          | 14 | Estimated number of participants needed to achieve study objectives and how it was determined, including clinical and statistical assumptions supporting any sample size calculations | __17-18__                |
| 5 |                      |    |                                                                                                                                                                                       |                          |
| 6 |                      |    |                                                                                                                                                                                       |                          |
| 7 | Recruitment          | 15 | Strategies for achieving adequate participant enrolment to reach target sample size                                                                                                   | __9__                    |
| 8 |                      |    |                                                                                                                                                                                       |                          |
| 9 |                      |    |                                                                                                                                                                                       |                          |

### Methods: Assignment of interventions (for controlled trials)

#### Allocation:

|    |                                  |     |                                                                                                                                                                                                                                                                                                                                                          |           |
|----|----------------------------------|-----|----------------------------------------------------------------------------------------------------------------------------------------------------------------------------------------------------------------------------------------------------------------------------------------------------------------------------------------------------------|-----------|
| 14 | Sequence generation              | 16a | Method of generating the allocation sequence (eg, computer-generated random numbers), and list of any factors for stratification. To reduce predictability of a random sequence, details of any planned restriction (eg, blocking) should be provided in a separate document that is unavailable to those who enrol participants or assign interventions | __11__    |
| 15 |                                  |     |                                                                                                                                                                                                                                                                                                                                                          |           |
| 16 |                                  |     |                                                                                                                                                                                                                                                                                                                                                          |           |
| 17 |                                  |     |                                                                                                                                                                                                                                                                                                                                                          |           |
| 18 |                                  |     |                                                                                                                                                                                                                                                                                                                                                          |           |
| 19 |                                  |     |                                                                                                                                                                                                                                                                                                                                                          |           |
| 20 | Allocation concealment mechanism | 16b | Mechanism of implementing the allocation sequence (eg, central telephone; sequentially numbered, opaque, sealed envelopes), describing any steps to conceal the sequence until interventions are assigned                                                                                                                                                | __11__    |
| 21 |                                  |     |                                                                                                                                                                                                                                                                                                                                                          |           |
| 22 |                                  |     |                                                                                                                                                                                                                                                                                                                                                          |           |
| 23 |                                  |     |                                                                                                                                                                                                                                                                                                                                                          |           |
| 24 | Implementation                   | 16c | Who will generate the allocation sequence, who will enrol participants, and who will assign participants to interventions                                                                                                                                                                                                                                | __11__    |
| 25 |                                  |     |                                                                                                                                                                                                                                                                                                                                                          |           |
| 26 |                                  |     |                                                                                                                                                                                                                                                                                                                                                          |           |
| 27 |                                  |     |                                                                                                                                                                                                                                                                                                                                                          |           |
| 28 | Blinding (masking)               | 17a | Who will be blinded after assignment to interventions (eg, trial participants, care providers, outcome assessors, data analysts), and how                                                                                                                                                                                                                | __11-12__ |
| 29 |                                  |     |                                                                                                                                                                                                                                                                                                                                                          |           |
| 30 |                                  |     |                                                                                                                                                                                                                                                                                                                                                          |           |
| 31 |                                  | 17b | If blinded, circumstances under which unblinding is permissible, and procedure for revealing a participant's allocated intervention during the trial                                                                                                                                                                                                     | __-__     |
| 32 |                                  |     |                                                                                                                                                                                                                                                                                                                                                          |           |
| 33 |                                  |     |                                                                                                                                                                                                                                                                                                                                                          |           |
| 34 |                                  |     |                                                                                                                                                                                                                                                                                                                                                          |           |

### Methods: Data collection, management, and analysis

|    |                         |     |                                                                                                                                                                                                                                                                                                                                                                                                              |           |
|----|-------------------------|-----|--------------------------------------------------------------------------------------------------------------------------------------------------------------------------------------------------------------------------------------------------------------------------------------------------------------------------------------------------------------------------------------------------------------|-----------|
| 37 | Data collection methods | 18a | Plans for assessment and collection of outcome, baseline, and other trial data, including any related processes to promote data quality (eg, duplicate measurements, training of assessors) and a description of study instruments (eg, questionnaires, laboratory tests) along with their reliability and validity, if known. Reference to where data collection forms can be found, if not in the protocol | __14-17__ |
| 38 |                         |     |                                                                                                                                                                                                                                                                                                                                                                                                              |           |
| 39 |                         |     |                                                                                                                                                                                                                                                                                                                                                                                                              |           |
| 40 |                         |     |                                                                                                                                                                                                                                                                                                                                                                                                              |           |
| 41 |                         |     |                                                                                                                                                                                                                                                                                                                                                                                                              |           |
| 42 |                         |     |                                                                                                                                                                                                                                                                                                                                                                                                              |           |
| 43 |                         |     |                                                                                                                                                                                                                                                                                                                                                                                                              |           |
| 44 |                         |     |                                                                                                                                                                                                                                                                                                                                                                                                              |           |
| 45 |                         |     |                                                                                                                                                                                                                                                                                                                                                                                                              |           |
| 46 |                         |     |                                                                                                                                                                                                                                                                                                                                                                                                              |           |
| 47 |                         |     |                                                                                                                                                                                                                                                                                                                                                                                                              |           |

|    |                                 |     |                                                                                                                                                                                                                                                                                                                                       |                        |
|----|---------------------------------|-----|---------------------------------------------------------------------------------------------------------------------------------------------------------------------------------------------------------------------------------------------------------------------------------------------------------------------------------------|------------------------|
| 1  |                                 | 18b | Plans to promote participant retention and complete follow-up, including list of any outcome data to be collected for participants who discontinue or deviate from intervention protocols                                                                                                                                             | _____17_____           |
| 2  |                                 |     |                                                                                                                                                                                                                                                                                                                                       |                        |
| 3  |                                 |     |                                                                                                                                                                                                                                                                                                                                       |                        |
| 4  | Data management                 | 19  | Plans for data entry, coding, security, and storage, including any related processes to promote data quality (eg, double data entry; range checks for data values). Reference to where details of data management procedures can be found, if not in the protocol                                                                     | _____17_____           |
| 5  |                                 |     |                                                                                                                                                                                                                                                                                                                                       |                        |
| 6  |                                 |     |                                                                                                                                                                                                                                                                                                                                       |                        |
| 7  |                                 |     |                                                                                                                                                                                                                                                                                                                                       |                        |
| 8  |                                 |     |                                                                                                                                                                                                                                                                                                                                       |                        |
| 9  | Statistical methods             | 20a | Statistical methods for analysing primary and secondary outcomes. Reference to where other details of the statistical analysis plan can be found, if not in the protocol                                                                                                                                                              | _____18-19_____        |
| 10 |                                 |     |                                                                                                                                                                                                                                                                                                                                       |                        |
| 11 |                                 |     |                                                                                                                                                                                                                                                                                                                                       |                        |
| 12 |                                 | 20b | Methods for any additional analyses (eg, subgroup and adjusted analyses)                                                                                                                                                                                                                                                              | _____19_____           |
| 13 |                                 |     |                                                                                                                                                                                                                                                                                                                                       |                        |
| 14 |                                 | 20c | Definition of analysis population relating to protocol non-adherence (eg, as randomised analysis), and any statistical methods to handle missing data (eg, multiple imputation)                                                                                                                                                       | _____13-14,<br>18_____ |
| 15 |                                 |     |                                                                                                                                                                                                                                                                                                                                       |                        |
| 16 |                                 |     |                                                                                                                                                                                                                                                                                                                                       |                        |
| 17 |                                 |     |                                                                                                                                                                                                                                                                                                                                       |                        |
| 18 |                                 |     |                                                                                                                                                                                                                                                                                                                                       |                        |
| 19 | <b>Methods: Monitoring</b>      |     |                                                                                                                                                                                                                                                                                                                                       |                        |
| 20 |                                 |     |                                                                                                                                                                                                                                                                                                                                       |                        |
| 21 | Data monitoring                 | 21a | Composition of data monitoring committee (DMC); summary of its role and reporting structure; statement of whether it is independent from the sponsor and competing interests; and reference to where further details about its charter can be found, if not in the protocol. Alternatively, an explanation of why a DMC is not needed | _____ - _____          |
| 22 |                                 |     |                                                                                                                                                                                                                                                                                                                                       |                        |
| 23 |                                 |     |                                                                                                                                                                                                                                                                                                                                       |                        |
| 24 |                                 |     |                                                                                                                                                                                                                                                                                                                                       |                        |
| 25 |                                 |     |                                                                                                                                                                                                                                                                                                                                       |                        |
| 26 |                                 |     |                                                                                                                                                                                                                                                                                                                                       |                        |
| 27 |                                 | 21b | Description of any interim analyses and stopping guidelines, including who will have access to these interim results and make the final decision to terminate the trial                                                                                                                                                               | _____ - _____          |
| 28 |                                 |     |                                                                                                                                                                                                                                                                                                                                       |                        |
| 29 |                                 |     |                                                                                                                                                                                                                                                                                                                                       |                        |
| 30 | Harms                           | 22  | Plans for collecting, assessing, reporting, and managing solicited and spontaneously reported adverse events and other unintended effects of trial interventions or trial conduct                                                                                                                                                     | _____16_____           |
| 31 |                                 |     |                                                                                                                                                                                                                                                                                                                                       |                        |
| 32 |                                 |     |                                                                                                                                                                                                                                                                                                                                       |                        |
| 33 |                                 |     |                                                                                                                                                                                                                                                                                                                                       |                        |
| 34 | Auditing                        | 23  | Frequency and procedures for auditing trial conduct, if any, and whether the process will be independent from investigators and the sponsor                                                                                                                                                                                           | _____ - _____          |
| 35 |                                 |     |                                                                                                                                                                                                                                                                                                                                       |                        |
| 36 |                                 |     |                                                                                                                                                                                                                                                                                                                                       |                        |
| 37 |                                 |     |                                                                                                                                                                                                                                                                                                                                       |                        |
| 38 | <b>Ethics and dissemination</b> |     |                                                                                                                                                                                                                                                                                                                                       |                        |
| 39 |                                 |     |                                                                                                                                                                                                                                                                                                                                       |                        |
| 40 | Research ethics approval        | 24  | Plans for seeking research ethics committee/institutional review board (REC/IRB) approval                                                                                                                                                                                                                                             | _____20_____           |
| 41 |                                 |     |                                                                                                                                                                                                                                                                                                                                       |                        |
| 42 |                                 |     |                                                                                                                                                                                                                                                                                                                                       |                        |
| 43 |                                 |     |                                                                                                                                                                                                                                                                                                                                       |                        |
| 44 |                                 |     |                                                                                                                                                                                                                                                                                                                                       |                        |
| 45 |                                 |     |                                                                                                                                                                                                                                                                                                                                       |                        |
| 46 |                                 |     |                                                                                                                                                                                                                                                                                                                                       |                        |
| 47 |                                 |     |                                                                                                                                                                                                                                                                                                                                       |                        |

|    |                               |     |                                                                                                                                                                                                                                                                                     |               |
|----|-------------------------------|-----|-------------------------------------------------------------------------------------------------------------------------------------------------------------------------------------------------------------------------------------------------------------------------------------|---------------|
| 1  | Protocol                      | 25  | Plans for communicating important protocol modifications (eg, changes to eligibility criteria, outcomes, analyses) to relevant parties (eg, investigators, REC/IRBs, trial participants, trial registries, journals, regulators)                                                    | _____20_____  |
| 2  | amendments                    |     |                                                                                                                                                                                                                                                                                     |               |
| 3  |                               |     |                                                                                                                                                                                                                                                                                     |               |
| 4  |                               |     |                                                                                                                                                                                                                                                                                     |               |
| 5  | Consent or assent             | 26a | Who will obtain informed consent or assent from potential trial participants or authorised surrogates, and how (see Item 32)                                                                                                                                                        | _____20_____  |
| 6  |                               |     |                                                                                                                                                                                                                                                                                     |               |
| 7  |                               |     |                                                                                                                                                                                                                                                                                     |               |
| 8  |                               |     |                                                                                                                                                                                                                                                                                     |               |
| 9  |                               | 26b | Additional consent provisions for collection and use of participant data and biological specimens in ancillary studies, if applicable                                                                                                                                               | _____ - _____ |
| 10 |                               |     |                                                                                                                                                                                                                                                                                     |               |
| 11 | Confidentiality               | 27  | How personal information about potential and enrolled participants will be collected, shared, and maintained in order to protect confidentiality before, during, and after the trial                                                                                                | _____ - _____ |
| 12 |                               |     |                                                                                                                                                                                                                                                                                     |               |
| 13 |                               |     |                                                                                                                                                                                                                                                                                     |               |
| 14 |                               |     |                                                                                                                                                                                                                                                                                     |               |
| 15 | Declaration of interests      | 28  | Financial and other competing interests for principal investigators for the overall trial and each study site                                                                                                                                                                       | _____24_____  |
| 16 |                               |     |                                                                                                                                                                                                                                                                                     |               |
| 17 |                               |     |                                                                                                                                                                                                                                                                                     |               |
| 18 | Access to data                | 29  | Statement of who will have access to the final trial dataset, and disclosure of contractual agreements that limit such access for investigators                                                                                                                                     | _____ - _____ |
| 19 |                               |     |                                                                                                                                                                                                                                                                                     |               |
| 20 |                               |     |                                                                                                                                                                                                                                                                                     |               |
| 21 | Ancillary and post-trial care | 30  | Provisions, if any, for ancillary and post-trial care, and for compensation to those who suffer harm from trial participation                                                                                                                                                       | _____ - _____ |
| 22 |                               |     |                                                                                                                                                                                                                                                                                     |               |
| 23 |                               |     |                                                                                                                                                                                                                                                                                     |               |
| 24 |                               |     |                                                                                                                                                                                                                                                                                     |               |
| 25 | Dissemination policy          | 31a | Plans for investigators and sponsor to communicate trial results to participants, healthcare professionals, the public, and other relevant groups (eg, via publication, reporting in results databases, or other data sharing arrangements), including any publication restrictions | _____20_____  |
| 26 |                               |     |                                                                                                                                                                                                                                                                                     |               |
| 27 |                               |     |                                                                                                                                                                                                                                                                                     |               |
| 28 |                               |     |                                                                                                                                                                                                                                                                                     |               |
| 29 |                               | 31b | Authorship eligibility guidelines and any intended use of professional writers                                                                                                                                                                                                      | _____ - _____ |
| 30 |                               |     |                                                                                                                                                                                                                                                                                     |               |
| 31 |                               | 31c | Plans, if any, for granting public access to the full protocol, participant-level dataset, and statistical code                                                                                                                                                                     | _____24_____  |
| 32 |                               |     |                                                                                                                                                                                                                                                                                     |               |
| 33 |                               |     |                                                                                                                                                                                                                                                                                     |               |
| 34 | <b>Appendices</b>             |     |                                                                                                                                                                                                                                                                                     |               |
| 35 |                               |     |                                                                                                                                                                                                                                                                                     |               |
| 36 | Informed consent materials    | 32  | Model consent form and other related documentation given to participants and authorised surrogates                                                                                                                                                                                  | _____ - _____ |
| 37 |                               |     |                                                                                                                                                                                                                                                                                     |               |
| 38 |                               |     |                                                                                                                                                                                                                                                                                     |               |
| 39 | Biological specimens          | 33  | Plans for collection, laboratory evaluation, and storage of biological specimens for genetic or molecular analysis in the current trial and for future use in ancillary studies, if applicable                                                                                      | _____ - _____ |
| 40 |                               |     |                                                                                                                                                                                                                                                                                     |               |
| 41 |                               |     |                                                                                                                                                                                                                                                                                     |               |
| 42 |                               |     |                                                                                                                                                                                                                                                                                     |               |

1  
2  
3  
4  
5  
6  
7  
8  
9  
10  
11  
12  
13  
14  
15  
16  
17  
18  
19  
20  
21  
22  
23  
24  
25  
26  
27  
28  
29  
30  
31  
32  
33  
34  
35  
36  
37  
38  
39  
40  
41  
42  
43  
44  
45  
46  
47

\*It is strongly recommended that this checklist be read in conjunction with the SPIRIT 2013 Explanation & Elaboration for important clarification on the items. Amendments to the protocol should be tracked and dated. The SPIRIT checklist is copyrighted by the SPIRIT Group under the Creative Commons [“Attribution-NonCommercial-NoDerivs 3.0 Unported”](#) license.

For peer review only

# BMJ Open

## Electroacupuncture for treating insomnia in cancer patients: a study protocol for a randomised pilot clinical trial

|                                 |                                                                                                                                                                                                                                                                                                                                                                                                                                                                                                                                                                                                                                                                                                                                                                                    |
|---------------------------------|------------------------------------------------------------------------------------------------------------------------------------------------------------------------------------------------------------------------------------------------------------------------------------------------------------------------------------------------------------------------------------------------------------------------------------------------------------------------------------------------------------------------------------------------------------------------------------------------------------------------------------------------------------------------------------------------------------------------------------------------------------------------------------|
| Journal:                        | <i>BMJ Open</i>                                                                                                                                                                                                                                                                                                                                                                                                                                                                                                                                                                                                                                                                                                                                                                    |
| Manuscript ID                   | bmjopen-2017-016269.R2                                                                                                                                                                                                                                                                                                                                                                                                                                                                                                                                                                                                                                                                                                                                                             |
| Article Type:                   | Protocol                                                                                                                                                                                                                                                                                                                                                                                                                                                                                                                                                                                                                                                                                                                                                                           |
| Date Submitted by the Author:   | 13-May-2017                                                                                                                                                                                                                                                                                                                                                                                                                                                                                                                                                                                                                                                                                                                                                                        |
| Complete List of Authors:       | Kim, Mikyung; Korea Institute of Oriental Medicine, Clinical Research Division<br>Kim, Jung Eun; Korea Institute of Oriental Medicine<br>Lee, Hye-Yoon ; Korea Institute of Oriental Medicine, Clinical Research Division<br>Kim, Ae-Ran ; Korea Institute of Oriental Medicine, Clinical Research Division<br>Park, Hyo-Ju; Korea Institute of Oriental Medicine, Clinical Research Division<br>Kwon, O-Jin; Korea Institute of Oriental Medicine, Clinical Research Division<br>Kim, Bo-Kyung ; Dong-eui University, Department of Neuropsychiatry, College of Oriental Medicine<br>Cho, Jung Hyo; Daejeon University, Department of Internal Medicine, College of Traditional Korean Medicine<br>Kim, Joo-Hee; Korea Institute of Oriental Medicine, Clinical Research Division |
| <b>Primary Subject Heading</b>: | Complementary medicine                                                                                                                                                                                                                                                                                                                                                                                                                                                                                                                                                                                                                                                                                                                                                             |
| Secondary Subject Heading:      | Mental health, Oncology                                                                                                                                                                                                                                                                                                                                                                                                                                                                                                                                                                                                                                                                                                                                                            |
| Keywords:                       | insomnia, sleep disturbance, cancer, electroacupuncture, randomised controlled trial                                                                                                                                                                                                                                                                                                                                                                                                                                                                                                                                                                                                                                                                                               |
|                                 |                                                                                                                                                                                                                                                                                                                                                                                                                                                                                                                                                                                                                                                                                                                                                                                    |

SCHOLARONE™  
Manuscripts



# Electroacupuncture for treating insomnia in cancer patients: a study protocol for a randomised pilot clinical trial

Mikyung Kim<sup>1</sup>, Jung-Eun Kim<sup>1</sup>, Hye-Yoon Lee<sup>1</sup>, Ae-Ran Kim<sup>1</sup>, Hyo-Ju Park<sup>1</sup>, O-Jin Kwon<sup>1</sup>, Bo-Kyung Kim<sup>2</sup>, Jung Hyo Cho<sup>3</sup>, Joo-Hee Kim<sup>1\*</sup>

<sup>1</sup> Clinical Research Division, Korea Institute of Oriental Medicine, Daejeon, Republic of Korea

<sup>2</sup> Department of Neuropsychiatry, College of Oriental Medicine, Dong-eui University, Busan, Republic of Korea

<sup>3</sup> Department of Internal Medicine, College of Traditional Korean Medicine, Daejeon University, Daejeon, Republic of Korea

Mikyung Kim: [01mkkim@gmail.com](mailto:01mkkim@gmail.com)

Jung-Eun Kim: [eujuki@gmail.com](mailto:eujuki@gmail.com)

Hye-Yoon Lee: [hyouun@kiom.re.kr](mailto:hyouun@kiom.re.kr)

Ae-Ran Kim: [arkim@kiom.re.kr](mailto:arkim@kiom.re.kr)

Hyo-Ju Park: [mable@kiom.re.kr](mailto:mable@kiom.re.kr)

O-Jin Kwon: [cheda1334@kiom.re.kr](mailto:cheda1334@kiom.re.kr)

Bo-Kyung Kim: [npjolie@hanmail.net](mailto:npjolie@hanmail.net);

Jung Hyo Cho: [choajoa@dju.kr](mailto:choajoa@dju.kr)

Joo-Hee Kim: [jhkim714v@gmail.com](mailto:jhkim714v@gmail.com)

1  
2  
3  
4 \* Correspondence to: Dr Joo-Hee Kim; [jhkim714v@gmail.com](mailto:jhkim714v@gmail.com)  
5

6 - Postal address: 1672 Yuseongdae-ro, Yuseong-gu, Daejeon (34054), Republic of Korea  
7

8 - Telephone number: 82-42-223-4052  
9

10  
11  
12 A full list of author information is available at the end of the article  
13

- 14  
15  
16 ● Word count 5,834 (excluding title page, abstract, references, figures and tables)  
17  
18  
19  
20  
21  
22  
23  
24  
25  
26  
27  
28  
29  
30  
31  
32  
33  
34  
35  
36  
37  
38  
39  
40  
41  
42  
43  
44  
45  
46  
47  
48  
49  
50  
51  
52  
53  
54  
55  
56  
57  
58  
59  
60

## Abstract

**Introduction:** Although insomnia is one of the most prevalent and disturbing symptoms among cancer patients, it has not been properly managed. Electroacupuncture (EA) has received attention as a promising intervention for insomnia, and a few previous studies have reported that this intervention may be beneficial for treating insomnia in cancer patients. The aim of this pilot study is to explore the feasibility and preliminary effectiveness of EA on the sleep disturbance of cancer patients with insomnia using a subjective method, patient-reported questionnaires and an objective tool, actigraphy to measure the quality of sleep.

**Methods and analysis:** This is a study protocol for a randomised, three-arm, multi-centre, pilot clinical trial. A total of 45 cancer patients who have continuous insomnia related to cancer treatment or cancer itself will be randomly allocated to an EA group, sham EA group, or usual care group in equal proportions. The EA group will receive 10 sessions of EA treatment over 4 weeks. The sham EA group will receive sham EA at non-acupoints using nonpenetrating Streitberger acupuncture needles with mock EA. The usual care group will not receive EA treatment. All participants will be provided a brochure on the management of sleep disorders regardless of their group assignment. The primary outcome measure is the mean change in the insomnia severity index from the baseline to week 5. Information related to sleep quality will also be obtained through the Pittsburgh Sleep Quality Index, a sleep diary, and actigraphy. Participants will complete the trial by visiting the research centre at week 9 for follow-up assessment.

**Ethics and dissemination:** This study protocol was approved by the institutional review boards of each research centres. Written informed consent will be obtained from all participants. The result of this study will be published in peer-reviewed journals or presented at academic conferences.

**Trial registration number:** Clinical Research Information Service KCT0002162.

## Strengths and limitations of this study

1. This randomised, multi-centre clinical trial is the first study in South Korea exploring the effect and safety of electroacupuncture as a treatment for sleep disturbance in cancer patients with insomnia.
2. In addition to patient-reported outcomes, the study will use actigraphy to acquire objective outcomes reflecting the quality of sleep.
3. The study will measure the levels of cortisol and melatonin in saliva as biomarkers reflecting the circadian rhythm of the body related to sleep and arousal.
4. Polysomnography needs to be included in future research to investigate sleep architecture and the various causes of sleep disorders.
5. Because of the unique nature of electroacupuncture and the design of this study, which includes a usual care group, it is impossible to completely blind the practitioners and all participants.
6. The study adopts nonpenetrating needling at non-acupoints as a sham comparator for acupuncture; however, a perfect placebo intervention for real acupuncture that exerts no physiologic effects while maintaining patient blinding has not been developed yet.
7. The sample size of this pilot study is 15 per each group, which may be underpowered to draw a definitive conclusion of the effectiveness of the intervention.

## INTRODUCTION

Insomnia is one of the most common afflictions among the general population, and the prevalence of insomnia is known to be twice as high as in cancer patients compared to healthy adults.<sup>1</sup> Complex interactions of various factors such as adverse reactions to chemotherapy,<sup>1</sup> circadian disruption,<sup>2</sup> inflammation,<sup>3</sup> and tumour growth<sup>3</sup> seem to be the reasons why cancer patients are especially susceptible to insomnia. Insomnia has a profound effect on the overall quality of life,<sup>4</sup> energy,<sup>5</sup> emotion,<sup>6</sup> memory,<sup>7</sup> and immune system<sup>8</sup> of cancer patients. In addition, insomnia is also known to be associated with decreased survival<sup>9</sup> and tumour worsening.<sup>10</sup> Although insomnia is such a common and important problem among cancer patients, it is not easily cured or well managed.<sup>1 11</sup>

The most commonly used therapy for the management of insomnia in cancer patients is pharmacotherapy.<sup>12</sup> According to Moore et al., approximately half of breast cancer patients are prescribed sleeping pills.<sup>13</sup> Long-term use of sleeping pills is known to be associated with continued sleep disturbance, decreased ability to perform daily activities, memory impairment, traffic accidents, falls, etc.<sup>12</sup> Thus, pharmacotherapy should be used only for a short-term period; however, approximately 30% of cancer patients are receiving sleeping pills even one year after the end of chemotherapy.<sup>13</sup>

In addition to pharmacotherapy, cognitive behavioural therapy has been recommended as a standard therapy for the improvement of insomnia.<sup>3</sup> However, there are some limitations to this therapy in that the compliance rate to the therapy is low because the therapeutic response does not appear immediately, and patient access to the therapy is low due to the high cost of the therapy.<sup>14</sup> Moreover, experienced therapists are rare, and the effect of therapy varies widely depending on the proficiency of the therapist.<sup>14</sup>

For this reason, there is a growing demand for complementary alternative medicine (CAM) in the field of sleep management. Acupuncture is one of the most commonly used therapeutic interventions in CAM. Acupuncture is a treatment that punctures and stimulates the skin at acupoints using specialised needles. Electroacupuncture (EA) refers to a method that supplies a constant physical stimulus to acupoints through the inserted acupuncture needle connected to a microcurrent stimulator.

Previous systematic reviews on the effect of acupuncture for insomnia have revealed that

1  
2  
3  
4 acupuncture is significantly more effective to improve sleep disturbance in insomniacs than  
5 no treatment<sup>15</sup> and sham acupuncture.<sup>15-17</sup> Insomnia has also been reported to be as effective  
6 as pharmacotherapy<sup>15</sup> or even superior to sleeping pills<sup>15,17</sup> and provides additional benefit to  
7 patients who are undergoing pharmacotherapy to improve insomnia.<sup>15,16</sup>  
8  
9

10  
11 The effect of acupuncture for the improvement of sleep disorders has also been identified in  
12 studies targeting cancer patients. A survey conducted at a major cancer centre in the United  
13 States showed that acupuncture significantly improved the quality of sleep in cancer  
14 patients.<sup>18</sup> Garland et al. also determined that 8-week EA was more effective than  
15 pharmacotherapy to attenuate sleep disturbance from a recently published randomised  
16 controlled trial including breast cancer patients suffering from hot flush.<sup>19</sup> Choi et al.  
17 systematically investigated the clinical studies on the effect of acupuncture for insomnia in  
18 cancer patients and indicated that acupuncture may be superior to sham acupuncture or  
19 pharmacotherapy.<sup>20</sup> However, these authors could not draw any firm conclusions because the  
20 level of evidence in the included studies was low overall, the effect size of the studies was too  
21 small to confirm their clinical significance, and there were few studies strictly designed and  
22 performed.<sup>20</sup>  
23  
24  
25  
26  
27  
28  
29  
30

31  
32 Subjective measurement tools such as self-reported questionnaires or sleep diaries are the  
33 most commonly used type of outcome measures for the assessment of sleep quality. This is  
34 because these tools are relatively simple to measure and have the advantage of not interfering  
35 with daily life or sleeping; however, one limitation of this approach is that the results of these  
36 measurements are entirely up to the decisions of participants and are unable to objectively  
37 measure the pattern of sleep.<sup>21</sup> Polysomnography and actigraphy are the two main methods to  
38 objectively measure sleep quality.<sup>21</sup>  
39  
40  
41  
42  
43

44 Polysomnography is a gold standard method for the objective measurement of sleep,<sup>3,21</sup>  
45 because it can demonstrate the sleep structure and the cause of sleep disorders in various  
46 ways including electroencephalogram, electromyogram, electrocardiogram, respiration and  
47 oxygen saturation, etc.<sup>22</sup> However, one disadvantage is that polysomnography requires an  
48 expensive device and an expert capable of interpreting the results.<sup>21</sup>  
49  
50  
51  
52

53 To overcome these shortcomings, actigraphy has been investigated.<sup>23</sup> Actigraphy is a  
54 noninvasive means of measuring the motion of the body using an actigraph, a piezoelectric  
55  
56

1  
2  
3  
4 accelerometer.<sup>23</sup> Actigraphy has been widely used in the field of sleep research because it can  
5 detect sleep, activity, and movement without disturbing the daily lives of the subjects who are  
6 only required to wear a small, watch-shaped device on the wrist.<sup>23</sup> Studies on the similarities  
7 and differences between the sleep quality measured by polysomnography, actigraphy, and  
8 subjective assessment tools have been published.<sup>23</sup> It is recommended to use both objective  
9 and subjective measurement methods to assess sleep quality in the field of sleep research.<sup>24</sup>  
10  
11  
12  
13

14 A few acupuncture researchers have reported the positive effect of acupuncture using  
15 objective measurement tools such as polysomnography<sup>25-27</sup> or actigraphy.<sup>28 29</sup> However, there  
16 remain conflicting results regarding whether acupuncture has the same effect on both  
17 subjective and objective aspects of sleep. Some researchers argued that the effect of  
18 acupuncture was approved via both objective and subjective measurement tools<sup>25-27</sup>, while  
19 others reported that acupuncture seemed to affect the subjective outcomes only, not the result  
20 of polysomnography<sup>30 31</sup> or actigraphy.<sup>32-34</sup>  
21  
22  
23  
24  
25  
26

27 The aim of this pilot study is to explore the feasibility and preliminary effectiveness of EA on  
28 the sleep disturbance of cancer patients with insomnia using both subjective questionnaires  
29 and objective actigraphy.  
30  
31  
32  
33  
34  
35  
36  
37  
38  
39  
40  
41  
42  
43  
44  
45  
46  
47  
48  
49  
50  
51  
52  
53  
54  
55  
56  
57  
58  
59  
60

## METHODS AND ANALYSIS

### Study design

This is a study protocol for a randomised, three-arm, multi-centre, pilot clinical trial. Forty-five cancer patients with insomnia will be randomly assigned to an EA group, sham EA group, or usual care group at a 1:1:1 ratio. The schedule of enrolment, interventions, and assessments is summarised in Table 1, and the flow diagram of the study is presented in Figure 1.

**Table 1** Schedule of enrolment, interventions, and assessments

| TIMEPOINT                              | STUDY PERIOD                        |                                     |                                                                                |   |        |                                                          |   |
|----------------------------------------|-------------------------------------|-------------------------------------|--------------------------------------------------------------------------------|---|--------|----------------------------------------------------------|---|
|                                        | Enrolment<br><i>-wk<sub>1</sub></i> | Allocation<br><i>wk<sub>0</sub></i> | Treatment<br><i>wk<sub>1</sub></i> <i>wk<sub>3</sub></i> <i>wk<sub>4</sub></i> |   |        | Follow-up<br><i>wk<sub>5</sub></i> <i>wk<sub>9</sub></i> |   |
| <b>ENROLMENT</b>                       |                                     |                                     |                                                                                |   |        |                                                          |   |
| Eligibility screen                     | X                                   |                                     |                                                                                |   |        |                                                          |   |
| Informed consent                       | X                                   |                                     |                                                                                |   |        |                                                          |   |
| Allocation                             |                                     | X                                   |                                                                                |   |        |                                                          |   |
| <b>INTERVENTIONS</b>                   |                                     |                                     |                                                                                |   |        |                                                          |   |
| EA                                     |                                     |                                     | ←————→                                                                         |   |        |                                                          |   |
| Sham EA                                |                                     |                                     | ←————→                                                                         |   |        |                                                          |   |
| Usual care                             |                                     |                                     | ←————→                                                                         |   |        |                                                          |   |
| <b>ASSESSMENTS</b>                     |                                     |                                     |                                                                                |   |        |                                                          |   |
| ISI                                    | X                                   | X                                   |                                                                                | X |        | X                                                        | X |
| PSQI                                   |                                     | X                                   |                                                                                | X |        | X                                                        | X |
| Sleep diary                            | ←————→                              |                                     | ←————→                                                                         |   |        |                                                          |   |
| Actigraphy                             | ←————→                              |                                     | ←————→                                                                         |   | ←————→ |                                                          |   |
| FACT-F                                 |                                     | X                                   |                                                                                |   |        | X                                                        |   |
| MoCA                                   |                                     | X                                   |                                                                                |   |        | X                                                        |   |
| BDSS                                   |                                     | X                                   |                                                                                |   |        |                                                          |   |
| Salivary hormone test                  |                                     | X                                   |                                                                                |   |        | X                                                        |   |
| Blinding/credibility test <sup>a</sup> |                                     |                                     | X                                                                              |   | X      |                                                          |   |
| Adverse event                          |                                     |                                     | X                                                                              | X | X      | X                                                        | X |



Laboratory test<sup>b</sup> X X

EA, Electroacupuncture; ISI, Insomnia Severity Inventory; PSQI, Pittsburgh Sleep Quality Index; FACT-F, Functional Assessment of Cancer Therapy-Fatigue; MoCA, The Montreal Cognitive Assessment; BDSS, Blood Deficiency Scoring System.

<sup>a</sup>Only EA and sham EA groups will undergo blinding and credibility tests.

<sup>b</sup>The laboratory test includes complete blood count and differential count, absolute neutrophil count, aspartate aminotransferase, alanine aminotransferase, total bilirubin, blood urea nitrogen, creatinine, albumin, erythrocyte sedimentation rate, thyroid-stimulating hormone, free thyroxine, and human chorionic gonadotropin urine test (only for women in their childbearing years at the screening visit).

## Recruitment

Two clinical research centres in South Korea will conduct this trial: Daejeon Oriental Hospital of Daejeon University and Dong-eui University Korean Medical Hospital in Busan. We will do our best to secure enough participants in this study using online and offline advertisement boards inside and outside the hospitals and by releasing flyers to daily local newspapers.

## Inclusion criteria

1. Patients aged 19 years or over but under 80 years
2. An Eastern Cooperative Oncology Group (ECOG) performance status  $\leq 2$
3. Cessation of cancer-related treatments (e.g., surgery, radiotherapy, chemotherapy, immunotherapy) at least 12 weeks before the trial (ongoing hormone therapy, which must have been initiated at least 3 weeks prior to enrolment, is allowed)
4. Continuous insomnia related to cancer treatment or cancer itself for at least 3 months, with fulfilment of The Diagnostic and Statistical Manual of Mental Disorders, Fifth Edition (DSM-5) diagnostic criteria for insomnia disorder
5. Total score in the Insomnia Severity Index (ISI)  $\geq 15$  points

1  
2  
3  
4 6. Willingness to participate in the trial and having provided written consent  
5  
6  
7

## 8 **Exclusion criteria**

9

- 10  
11 1. Having experienced the current level of sleep disorder prior to the diagnosis of cancer  
12  
13 2. Severe anaemia (platelet count < 60,000/ $\mu$ L, haemoglobin < 8 g/dL, or absolute neutrophil  
14 count < 1,000/ $\mu$ L)  
15  
16 3. A diagnosis of major depressive disorder, anxiety disorder, panic disorder, or other  
17 psychiatric disorder; caffeine, alcohol, or drug addiction; or a subscale of either anxiety or  
18 depression in Hamilton Anxiety and Depression Scale (HADS) score  $\geq$  11 points  
19  
20 4. Level of cancer pain measured by the numeric rating scale  $\geq$  4  
21  
22 5. An estimated life expectancy of six months or less  
23  
24 6. A plan for surgery, chemotherapy, or radiotherapy during the study  
25  
26 7. A recent change of regular medication to alleviate insomnia within 4 weeks of the  
27 beginning of the trial  
28  
29 8. Having taken sleeping pills as required within 2 weeks of the beginning of the trial  
30  
31 9. Having undergone Korean medical treatment (e.g., acupuncture, moxibustion, cupping,  
32 herbal medicine) within 4 weeks of the beginning of the trial  
33  
34 10. Initiation or a change in dietary supplement regimen or non-pharmacologic therapies (e.g.,  
35 cognitive behavioural therapy, exercise, etc.) for alleviating insomnia during the trial or  
36 within 4 weeks of the beginning of the trial  
37  
38 11. Working shifts or changes in day/night work schedule that could impact circadian rhythm  
39  
40 12. Suffering from pain severe enough to cause sleep disturbance or presence of any disease  
41 that could cause insomnia  
42  
43 13. Taking haemostatic agents (e.g., Greenmono, Advate, Monoclate-P, Facnyne, BeneFix)  
44 because of haemostatic disorders  
45  
46  
47  
48  
49  
50  
51  
52  
53  
54  
55  
56  
57  
58  
59  
60

1  
2  
3  
4 14. Abnormal findings in thyroid function test (abnormal level of free thyroxine [free T4] and  
5 thyroid stimulating hormone [TSH] < 0.1 µIU/ml or TSH > 5.1 µIU/ml)  
6

7  
8 15. History of hypersensitivity reactions to acupuncture or inability to cooperate with  
9 acupuncture therapy  
10

11 16. The presence of implants that could interfere with EA or a history of hypersensitivity  
12 reactions to electrostimulation  
13

14 17. Pregnancy, lactation, or planning to become pregnant  
15

16 18. Having participated in other clinical trials within 4 weeks of the beginning of the trial  
17

18 19. Difficulty complying with the study protocol  
19  
20  
21  
22  
23  
24  
25  
26  
27

## 28 **Randomisation and allocation concealment**

29 Fifteen subjects will be allocated to each group according to a randomisation schedule  
30 generated by an independent statistician using SAS (Version 9.4, SAS institute Inc., Cary,  
31 NC). A stratified randomisation method will be used with the research centre and the standard  
32 therapies for insomnia (regular sleep medications or cognitive behavioural therapy for  
33 insomnia) as stratification factors. The statistician will seal the randomisation codes in  
34 sequentially numbered opaque envelopes and send them to the research centres. These  
35 envelopes will be kept in double-locked cabinets at the centres. Each envelope will be opened  
36 by a practitioner to assign the participant to one of the three groups after acquiring informed  
37 consent and eligibility screening.  
38  
39  
40  
41  
42  
43  
44  
45  
46  
47  
48  
49

## 50 **Blinding**

51 Participant blinding will be limited to the participants in the EA and sham EA groups.  
52 Complete participant blinding is not possible because the subjects in the usual care group  
53  
54  
55  
56  
57  
58  
59  
60

cannot help but notice their allocated group. Practitioner blinding cannot be achieved because of the unique nature of EA treatment. The assessor blinding will be maintained by separating the staff members who perform EA and who measure the outcomes.

## Interventions

All participants of this trial will be educated with a brochure on the management of sleep disorders regardless of the assigned groups.

### EA group

Participants in the EA group will receive acupuncture treatment at GV20, EX-HN3, bilateral HT7, PC6, BL63, and KI4 using sterilised stainless steel acupuncture needles (Asiamed GmbH & Co., 0.25 × 25 mm) (Figure 2). In addition to these 10 acupoints, up to 4 more points can be optionally added according to the symptoms of the patients. If participants with lymphatic oedema refuse to be treated with the acupoints on the affected site, the acupoints near the oedema site can be omitted. After inducing *deqi* by twisting the acupuncture needles, electric stimulation using an EA device (ES-160, Ito Co Ltd, Tokyo, Japan) will be applied with a 4-Hz frequency, at an intensity that the participant can notice but feel comfortable with. The EA treatment will be performed for 30 min per time, with a total of 10 times over 4 weeks. This regimen was decided by consensus among experts traditional Korean medicine based on previous research.<sup>15-20 25-29 31 32 34</sup> Details of the EA treatment based on the standards for reporting interventions in clinical trials of the acupuncture checklist are tabulated in Supplementary File 1.

### Sham EA group

Participants in the sham EA group will receive sham acupuncture using nonpenetrating Streitberger acupuncture needles (Asiamed GmbH & Co.). Unlike the real acupuncture needle that is inserted into the skin, the tip of the Streitberger acupuncture needle is so blunt that it cannot penetrate the skin. The needles will be fixed by medical skin tape on the skin at

1  
2  
3  
4 non-acupoints unrelated to the management of sleep disorders in Korean traditional medicine  
5 as follows: upper limb 1 (1 cm lateral and 5 cm proximal points from cubital creases of  
6 bilateral arms); upper limb 2 (2 cm above the upper limb 1 point); lower limb 1 (1.5 cm  
7 above the depression at the midpoint of the upper border of the bilateral patella); lower limb 2  
8 (area 1/3 above the medial part of the bilateral tibia); and lower limb 3 (1.5 cm above the  
9 lower limb 2 point). The same EA device will be applied to the Streitberger acupuncture  
10 needles, with an identical beeping sound and light signals as for the EA group. However, the  
11 electric current will not be delivered.  
12  
13  
14  
15  
16

### 17 18 **Usual care group** 19

20 Participants in the usual care group will not receive EA treatment. These subjects will  
21 maintain the usual treatment and self-care but cannot begin any additional treatment to  
22 improve their insomnia during the study period.  
23  
24  
25  
26  
27  
28  
29  
30

### 31 **Prohibited and permitted concomitant treatment** 32

33  
34 The participants will be prohibited from any Korean traditional medical treatment such as  
35 acupuncture, moxibustion, cupping, or herbal drugs to attenuate their insomnia symptoms  
36 except for the EA provided by the trial. If the participants remained on regular medication to  
37 improve insomnia at least 4 weeks prior to the beginning of the trial, they will be allowed to  
38 maintain the medication. However, if the type or dosage of the sleeping pill is changed during  
39 the trial, the subjects will be withdrawn from the study. If the subjects are receiving standard  
40 nonpharmacological treatment, such as cognitive behavioural therapy, or taking any dietary  
41 supplements to attenuate insomnia from at least 4 weeks prior to the beginning of the trial,  
42 they will be allowed to maintain these treatments. However, their regimens cannot be  
43 changed during the trial.  
44  
45  
46  
47  
48  
49  
50

51  
52 The participants will be trained to report all treatments newly received after the beginning of  
53 the trial to the staff members, and their treatment history will be recorded on the case report  
54 form (CRF). When participants are found to have received a prohibited treatment during the  
55  
56

1  
2  
3  
4 study period, they will be withdrawn from the trial. Despite withdrawal from the trial, the  
5 recordings of the participants will continue if the subjects have already randomised. To  
6 realise the intention-to-treat principle, the data from the withdrawn participants will also be  
7 included in the analysis set and recorded in the results.  
8  
9  
10

## 11 12 13 14 15 16 17 **Outcomes**

### 18 19 **Study feasibility outcomes**

20  
21 To see whether a full-scale randomised clinical trial for this issue is feasible, the recruitment  
22 rate and completion rate will be calculated. The overall rate of adherence to the planned  
23 intervention will also be ascertained.  
24  
25

### 26 27 **Primary outcome measure**

28  
29 The primary outcome measure of this study will be the mean change in the ISI from the  
30 baseline to the end of the 4-week intervention. The ISI is a 7-item questionnaire devised to  
31 diagnose and assess the severity of the insomnia. The total score of the ISI ranges from 0 to  
32 28 points, and it can categorise insomniacs according to scores of 0–7 (no clinically  
33 significant insomnia), 8–14 (subthreshold insomnia), 15–21 (clinical insomnia, moderate  
34 severity), and 22–28 (clinical insomnia, severe).<sup>35</sup> The Korean version of the ISI validated by  
35 Cho et al. will be used in this study.<sup>36</sup>  
36  
37  
38  
39  
40  
41

### 42 43 **Secondary outcome measures**

44  
45 The secondary outcome measures of this study will include the mean changes in the total  
46 score of the ISI from baseline to week 3 and week 9 and changes in the scores of the  
47 Pittsburgh Sleep Quality Index (PSQI), Functional Assessment of Cancer Therapy-Fatigue  
48 (FACT-F), and Montreal Cognitive Assessment (MoCA); the level of the salivary hormones  
49 including cortisol and melatonin; and the quality of sleep measured by a sleep diary and  
50 actigraphy before and after the intervention.  
51  
52  
53  
54  
55  
56  
57  
58  
59  
60

1  
2  
3  
4 The PSQI is a self-reported questionnaire to assess the quality of sleep over the past month.  
5 This scale comprises of 7 components including subjective sleep quality, sleep latency, sleep  
6 duration, sleep efficiency, sleep disturbances, use of sleeping pills, and daytime dysfunction.  
7 The global PSQI score ranges from 0 to 21, and a higher score represents poorer quality of  
8 sleep.<sup>37</sup> The Korean version of the PSQI validated by Sohn et al. will be used in this study.<sup>38</sup>

9  
10  
11  
12 The change of the global score in the PSQI will be assessed at baseline, week 3, week 5, and  
13 week 9.

14  
15  
16  
17 The FACT-F is a questionnaire devised to determine the level of fatigue of cancer patients.  
18 This instrument consists of the FACT-general (G) and the fatigue subscale. The FACT-G is  
19 composed of 27 items in 4 domains including physical well-being, social/family well-being,  
20 emotional well-being, and functional well-being. The fatigue subscale has 13 items assessing  
21 the level of fatigue. The total score of the FACT-F ranges from 0 to 160, where higher points  
22 denote a higher level of fatigue that disturbs the daily life of the patients.<sup>39</sup> Lee et al.  
23 validated the Korean version of the FACT-G.<sup>40</sup> Jeong et al. have translated and validated the  
24 Korean version of the fatigue subscale and also used it with Lee's Korean version of the  
25 FACT-G among patients with cancer-related fatigue.<sup>41</sup> In other words, the Korean version of  
26 the complete FACT-F has been used to measure the level of fatigue among cancer patients in  
27 Korea.<sup>41</sup> FACT-F scores will be assessed at baseline and week 5.

28  
29  
30  
31  
32  
33  
34  
35  
36 The MoCA is a one-page, 30-point test originally devised to screen for mild cognitive  
37 impairment in the geriatric population and can also be applied to evaluate the level of  
38 cognition of cancer survivors.<sup>42</sup> The validated Korean version of the MoCA will be used in  
39 this study.<sup>43</sup> The MoCA will be assessed at baseline and week 5 by the assessors who will be  
40 blinded to the group allocation

41  
42  
43  
44  
45  
46  
47  
48  
49  
50  
51  
52  
53  
54  
55  
56  
57  
58  
59  
60  
The change in the level of cortisol and melatonin in saliva will be measured before and after  
the intervention. These levels are known to reflect the circadian rhythm of the human body.  
The level of cortisol usually surges in the morning, while melatonin release increases at night  
in normal conditions, and the constant change of these hormones is known to be closely  
related to arousal and sleep.<sup>44</sup> <sup>45</sup> We will check whether this type of rhythmical change in  
these hormones differs before and after the intervention.

1  
2  
3  
4 To understand the details of the sleep status of the participants, a sleep diary will be provided  
5 to each participant. The subjects will be educated to write down their bedtime, final  
6 awakening time, sleep latency, number and duration of awakenings, perceived sleep duration,  
7 midday nap, and use of sleeping pills throughout the study period.<sup>46</sup>  
8  
9

10  
11 To objectively measure the sleep patterns of the participants, actigraphy will be used in this  
12 trial. The candidate participants will wear a watch-type, physical activity monitoring device  
13 (ActiGraph™ wGT3X-BT, MTI Health Services Company, Pensacola, FL, USA) on their  
14 nondominant wrists for at least one week during the screening period. The subjects who meet  
15 all eligibility criteria will keep wearing the device during the 4 weeks of the intervention  
16 period to record their sleep and activity. Using this method, we can acquire objective data on  
17 the participants' sleep quality including the total time in bed, sleep latency, wake after sleep  
18 onset, total sleep time, and sleep efficiency.<sup>23</sup>  
19  
20  
21  
22  
23  
24

### 25 **Blinding test and credibility test**

26  
27 The participants in the EA and sham EA groups will participate in the blinding test and  
28 credibility test after the first and last treatments. The purpose of these tests is to check  
29 whether the participant blinding was maintained for these groups. The blinding test will ask  
30 the participants which type of acupuncture they think has been received, real EA, sham EA,  
31 or unknown. The credibility test assesses the level of confidence in the treatment they have  
32 received. The score of this test ranges from 0 to 6, where a higher score reflects higher  
33 confidence in the treatment.<sup>47</sup>  
34  
35  
36  
37  
38  
39

### 40 **Safety assessment**

41  
42 For the safety assessment, the investigators will ask the participants on each visit if they have  
43 experienced any adverse events (AE). Laboratory tests will also be performed at baseline and  
44 week 5 to detect AEs. This test includes a complete blood count and differential count,  
45 absolute neutrophil count, aspartate aminotransferase, alanine aminotransferase, total  
46 bilirubin, blood urea nitrogen, creatinine, albumin, erythrocyte sedimentation rate, thyroid-  
47 stimulating hormone, free thyroxine, and human chorionic gonadotropin urine tests (only for  
48 women in their childbearing years at the screening visit).  
49  
50  
51  
52  
53  
54  
55  
56  
57  
58  
59  
60



1  
2  
3  
4 The severity of AEs will be primarily assessed according to the National Cancer Institute  
5 Common Terminology Criteria for Adverse Events (NCI-CTCAE) version 4.0.<sup>48</sup> When the  
6 NCI-CTCAE is not applicable, Spilker's three level criteria will be used instead.<sup>49</sup> The type of  
7 AE and its severity will be recorded to the CRF regardless of the relationship with the  
8 intervention provided in this study. The relationship between the treatment and the AE will be  
9 recorded as definitely related, probably related, possibly related, probably not related,  
10 definitely not related, or unknown.  
11  
12  
13  
14  
15  
16  
17  
18  
19  
20

## 21 **Data collection and management**

22  
23  
24 Data will be collected after acquiring the signed consent from the participants. The collected  
25 data will be recorded on the CRF by certificated clinical research coordinators. The whole  
26 process of the trial will be regularly monitored to ensure the quality of the trial. Periodic  
27 monitoring will confirm that the data in the CRF match the source document and that the  
28 procedures of the recruitment, intervention and assessment follow the protocol.  
29  
30  
31

32  
33 To guarantee the consistency of the procedures of the intervention and assessment between  
34 research centres, a standard operating procedure will be set and provided to the investigators.  
35 The practitioners are limited to licensed doctors of Korean medicine who have at least 2 years  
36 of clinical experience, and all investigators are required to take training courses for good  
37 clinical practice.  
38  
39  
40

41  
42 To promote participant retention and prevent follow-up loss, the researchers will make phone  
43 calls to participants prior to follow-up sessions. We will also inquire the participants failing to  
44 attend follow-up or treatment sessions about the reasons for absence and encourage  
45 compliance by telephone.  
46  
47  
48  
49  
50

## 51 **Sample size**

1  
2  
3  
4 The purpose of this pilot clinical trial is to explore the potential efficacy and safety of EA for  
5 insomnia in cancer patients. Therefore, a prospective sample size calculation was not  
6 performed. The result of this study will serve as the basis for sample size calculation for a  
7 full-scale trial on this theme in the future. An opinion from an expert in medical statistics  
8 recommended that the minimal number of people per group be 12 for a pilot study,<sup>50</sup> and  
9 assuming a dropout rate of 20%, 15 participants in each group or a total of 45 participants  
10 will be deemed appropriate for this research setting.  
11  
12  
13  
14  
15  
16  
17  
18  
19  
20

## 21 **Statistical analysis**

22  
23  
24  
25 A full analysis set (FAS), which realises the intention-to-treat ideal as closely as possible,<sup>51</sup>  
26 will be the main set for primary analysis. The FAS includes all participants initially allocated  
27 to one of the three groups of the study; however, it excludes the data from participants who  
28 do not meet the eligibility criteria, who never received the intervention in this study, or who  
29 never provided any outcome value in this study. A per-protocol (PP) set will be used for  
30 sensitivity analysis to compare the results from the FAS. The PP set comprises the  
31 participants who completed the trial without major violation of the protocol, with having  
32 received at least 70% of the planned intervention and provided all outcome values.  
33  
34  
35  
36  
37  
38

39 A two-sided significance level will be set at 5%, and the multiple imputation method will be  
40 adopted for missing data. SAS® Version 9.4 (SAS institute. Inc., Cary, NC) will be used for  
41 statistical analysis.  
42  
43

44 Demographic characteristics and baseline measurements of the variables of each group will  
45 be summarised. Continuous data will be expressed as the mean  $\pm$  standard deviation. Analysis  
46 of variance (ANOVA) or the Kruskal–Wallis test will performed to compare the continuous  
47 data from each group. A 95% confidence interval can be presented as needed. For  
48 dichotomous or categorical data, frequency and percentile will be presented, and the  
49 difference between groups will be compared using a chi-square test or the Fisher's exact test.  
50  
51  
52  
53  
54  
55  
56  
57  
58  
59  
60

1  
2  
3  
4 The mean change of the ISI score from baseline to week 5 is the primary outcome measure of  
5 this study. To identify statistically significant differences in the primary outcome measure  
6 between groups, two sets of hypotheses are assumed as described below.  
7  
8  
9

10  
11  
12 Set 1

13  
14 The null hypothesis ( $H_{01}$ ): There is no difference in the mean change of the ISI before and after  
15 treatment between the EA group and the usual care group.  
16

17 The alternative hypothesis ( $H_{11}$ ): There is a difference in the mean change of the ISI before and after  
18 treatment between the EA group and the usual care group.  
19

20  
21  
22 Set 2

23  
24 The null hypothesis ( $H_{02}$ ): There is no difference in the mean change of the ISI before and after  
25 treatment between the EA group and the sham EA group.  
26

27  
28 The alternative hypothesis ( $H_{12}$ ): There is a difference in the mean change of the ISI before and after  
29 treatment between the EA group and the sham EA group.  
30

31  
32  
33  
34 If  $H_{01}$  is rejected and  $H_{11}$  is adopted in the statistical analysis for set 1, the test for the  
35 hypotheses of set 2 will be verified. However, if  $H_{01}$  is adopted in the test for the set 1  
36 hypotheses, no further validation for the set 2 hypotheses will be required.  
37

38  
39  
40 To validate the hypotheses, an analysis of covariance (ANCOVA) will be performed with the  
41 baseline value as a covariate and each group as a fixed factor. If there is any significant  
42 difference between groups among the demographic characteristics or baseline measurements  
43 of the variables, it will be adjusted according to its covariance. The problem of multiple  
44 comparison will be solved using the fixed sequence method.<sup>52</sup>  
45  
46  
47

48  
49 The secondary outcome measures will be analysed via the same methods used for the primary  
50 outcome measure analysis. The change of the outcome measures before and after the  
51 intervention within a group will be analysed using Student's paired t-test or Wilcoxon signed-  
52 rank test. Repeated measures ANOVA with post-hoc Dunnett's procedure will be used to  
53 validate the differences in the trends per visit.  
54  
55  
56

1  
2  
3  
4 Subgroup analysis will be conducted to determine whether the severity of insomnia,  
5 significant blood deficiency pattern according to a blood deficiency scoring system, or level  
6 of expectancy to the EA treatment at baseline affects the clinical response to EA. The  
7 correlation of the sleep-related variables extracted from an objective source (actigraphy) and  
8 a subjective source (patient-reported questionnaires) will be evaluated.  
9  
10  
11  
12  
13  
14  
15  
16  
17  
18  
19

## 20 **Ethics and dissemination**

21  
22 Licensed doctors of Korean medicine will obtain informed consent at each research centre.  
23 Only the participants who sign the informed consent form will be included in the study. The  
24 study protocol has been approved by the institutional review boards (IRBs) of the  
25 participating research centres; Daejeon Oriental Hospital of Daejeon University and Dong-eui  
26 University Korean Medical Hospital in Busan. The approved protocol was registered with the  
27 Clinical Research Information Service (CRIS) of South Korea (CRIS-KCT0002162).  
28  
29  
30  
31

32 Any modification to the protocol will be re-approved by the IRBs, documented in the online  
33 registry of CRIS, and reflected in the explanation for the participants. An amended consent  
34 form reflecting the revised protocol must be obtained from the participants.  
35  
36  
37

38 The result of this study will be published in peer-reviewed journals or academic conferences.  
39  
40  
41  
42  
43  
44  
45

## 46 **DISCUSSION**

47  
48 Despite the high prevalence and enormous impact of insomnia in cancer patients, its  
49 importance has been overlooked.<sup>1</sup> The National Cancer Institute and National Comprehensive  
50 Cancer Network have strongly recommended evaluation and appropriate treatment of the  
51 sleep disturbance of cancer survivors during routine survivorship care.<sup>11</sup> Nevertheless, it  
52 seems that most hospitals and cancer centres are not properly managing the insomnia of  
53  
54  
55  
56  
57  
58  
59  
60

1  
2  
3  
4 cancer patients.<sup>11</sup>  
5

6  
7  
8 Insomnia is one of the areas in which acupuncture-related publications have been most  
9 commonly focused for the last 20 years.<sup>53</sup> Previous researches have shown that acupuncture  
10 is an effective intervention for insomnia. Acupuncture also appears to be effective for the  
11 sleep disorders of cancer patients, but its effect on the cancer population has been studied  
12 relatively less than in general insomniacs. Thus, we expect that the results of this study will  
13 contribute to increasing the insufficient evidence in this area of research.  
14  
15

16  
17  
18 Reviewing previous studies, we found that acupuncture may have only a short-term effect on  
19 the insomnia of cancer patients. Mao et al. reported that the sleep quality of the EA group was  
20 significantly better than that of control group immediately after an 8-week intervention period,  
21 but this difference between groups disappeared after 4 weeks.<sup>54</sup> Another study by Otte et al.  
22 also showed a similar pattern that the effect of a 2-week acupuncture treatment vanished after  
23 a 4-week follow-up period.<sup>28</sup>  
24  
25  
26

27  
28  
29 However, according to the opinion of Choi et al., the effect of acupuncture seems to be  
30 strengthened over time.<sup>20</sup> These authors found that acupuncture was as good as conventional  
31 therapy and became better at follow-up visits 3 weeks after final treatment.<sup>20</sup> We will record  
32 the trend change of the effect of EA over time by assessing the response of the participants at  
33 baseline; week 3, a midpoint of the 4-week intervention; week 5, immediately after the end of  
34 the final intervention; and week 9, the final follow-up assessment. We expect the results of  
35 this study to contribute to solving the disagreement among the existing studies on the timing  
36 and duration of the effect of acupuncture on sleep disturbance in cancer patients.  
37  
38  
39

40  
41  
42 In addition to time duration, there are many factors that can influence the effectiveness of  
43 acupuncture. Among them, we will try to determine whether a certain pattern identified  
44 according to the theory of Korean traditional medicine, blood deficiency, is an important  
45 variable that can affect the response to acupuncture. Blood deficiency is one of the main  
46 patterns of insomnia in Korean traditional medicine, and this study will investigate how many  
47 patients are categorised with a blood deficiency pattern using a blood deficiency scoring  
48 system<sup>55</sup> and whether their treatment response is different from that of the non-blood  
49 deficiency group.  
50  
51  
52  
53  
54  
55

1  
2  
3  
4 In insomnia clinical trials, the placebo effect is very commonly observed.<sup>56</sup> The  
5 characteristics of insomnia—that it is intermittent and tends to maintain or even reinforce the  
6 therapeutic effect of specific treatment over long periods—seems to explain such a placebo  
7 effect.<sup>56</sup> This is the reason why the inclusion of a placebo control is generally recommended  
8 in insomnia clinical trials.<sup>56</sup> Thus, this study also included a sham EA group as a placebo  
9 control.

10  
11  
12  
13  
14 The sham EA group will receive sham acupuncture therapy at non-acupoints unrelated to  
15 insomnia using a Streitberger acupuncture needle. This sham needle was devised by  
16 Streitberger and Kleinhenz in 1998.<sup>57</sup> Its appearance is the same as real acupuncture needles,  
17 but the needle does not penetrate the skin. The suitability of this device as a placebo  
18 comparator for acupuncture needles has been validated,<sup>57</sup> and it has been used as a control  
19 intervention in several acupuncture clinical studies.<sup>58</sup>

20  
21  
22  
23  
24  
25 The Streitberger acupuncture needle is one of the two most commonly used and  
26 commercially available placebo devices in acupuncture clinical studies along with the Park  
27 sham device.<sup>58</sup> Nevertheless, approximately half of the clinical studies using these sham  
28 devices have concluded that the effects of real acupuncture and sham needles were not  
29 significantly different.<sup>58</sup> Generally, a placebo pill is used on the assumption that it has no  
30 pharmacological effect and is harmless.<sup>59</sup> However, it has been shown in many studies to date  
31 that sham acupuncture needles seem to have a significant physiological effect.<sup>59</sup> Thus, the  
32 development of a new placebo device as a perfect comparator for real acupuncture that has no  
33 physiologic effects while maintaining patient blinding is still a significant challenge for  
34 acupuncture researchers. However, we currently have no choice but to use one of these  
35 available sham devices while considering their limitations.

36  
37  
38  
39  
40  
41  
42  
43  
44 It is known that the proportion of the placebo effect is not inconsiderable in acupuncture  
45 treatment.<sup>59</sup> Moreover, as we have seen, patients with insomnia tend to respond strongly to  
46 placebo treatment. In addition, the response to sham acupuncture such as the skin sensation of  
47 pressure or tingling, may be akin to the response to acupressure, which is also known to be  
48 effective for insomnia.<sup>16</sup> Thus, a study design that directly compares acupuncture and sham  
49 acupuncture is likely to produce a false negative result, failing to detect the whole  
50 characteristic effect of acupuncture.<sup>59</sup> Therefore, we designed a three-arm parallel study  
51  
52  
53  
54  
55

1  
2  
3  
4 including the usual care group as well as a sham control group.  
5

6 The sample size of this pilot study is 15 per each group, which may be underpowered to  
7 confirm the hypothesis of the study. Further study will be required to draw a definitive  
8 conclusion of the effectiveness of EA for improving insomnia in cancer patients. The result of  
9 this preliminary study will become a basis to design a full-scale RCT to conclude this issue.  
10

11  
12  
13 The strength of this study is that it will acquire objective outcomes reflecting sleep quality  
14 and the related circadian rhythm. First, we will obtain both subjective and objective outcomes  
15 showing sleep quality using patient-reported questionnaires and actigraphy. Most of the  
16 acupuncture studies on insomnia have used only patient-reported outcomes; furthermore,  
17 even a small number of studies using objective outcomes such as polysomnography or  
18 actigraphy failed to show consistent results on the effect of acupuncture for each outcome.<sup>30-</sup>  
19  
20  
21  
22  
23  
24  
25  
26  
27  
28  
29  
30  
31  
32  
33  
34  
35  
36  
37  
38  
39  
40  
41  
42  
43  
44  
45  
46  
47  
48  
49  
50  
51  
52  
53  
54  
55  
56  
57  
58  
59  
60

<sup>34</sup> Based on the results of this study, we expect that we will be able to compare the difference between the subjective and objective outcomes and contribute to solving the conflict on this issue. Only actigraphy is used for objective outcome measures at this time; however, polysomnography, a gold standard method for insomnia diagnosis, should be included in future research.

Second, the difference in the levels of cortisol and melatonin in saliva between the groups will be compared as biomarkers reflecting the circadian rhythm of the body that affects the pattern of sleep. It is known that acupuncture modulates various neurotransmitters and hormones such as endorphin, serotonin, norepinephrine, cortisol and melatonin.<sup>44 45</sup> Among them, changes of the cortisol surge in the morning or melatonin increase at night time are known to be closely related to arousal and sleep.<sup>44 45</sup> Previous studies have reported that acupuncture can improve insomnia by affecting the pattern of cortisol<sup>60 61</sup> or melatonin<sup>27</sup> release. Based on these results, we will investigate the changes in salivary cortisol and melatonin in addition to the sleep quality of the participants.

## Trial status

This trial is currently recruiting participants.

## Author affiliations

<sup>1</sup> Clinical Research Division, Korea Institute of Oriental Medicine, Daejeon, Republic of Korea

<sup>2</sup> Department of Neuropsychiatry, College of Oriental Medicine, Dong-eui University, Busan, Republic of Korea

<sup>3</sup> Department of Internal Medicine, College of Traditional Korean Medicine, Daejeon University, Daejeon, Republic of Korea

## Contributors

MK and JHK conceived the study. MK drafted the protocol. JEK, HYL, ARK, and HJP participated in the design of the study and contributed to the refinement of the protocol. OJK was responsible for the statistical design of the study. BKK and JHC provided clinical advice and made critical revisions. JHK is a principal investigator of the study and has the final responsibility for the decision to submit this manuscript for publication. All authors approved the final manuscript.

## Funding

This work was supported by the Korea Institute of Oriental Medicine (grant number K16122 & K17122).

## Competing interests

None declared.

## Patient consent

Will be obtained.

## Ethics approval

Daejeon Oriental Hospital of Daejeon University IRB (djomc-140-1); Dong-eui University Korean Medical Hospital IRB (2016-04)

## Provenance and peer review

Not commissioned; this study was peer reviewed for ethics and funding approval prior to submission.



1  
2  
3  
4  
5  
6  
7  
8  
9  
10  
11  
12  
13  
14  
15  
16  
17  
18  
19  
20  
21  
22  
23  
24  
25  
26  
27  
28  
29  
30  
31  
32  
33  
34  
35  
36  
37  
38  
39  
40  
41  
42  
43  
44  
45  
46  
47  
48  
49  
50  
51  
52  
53  
54  
55  
56  
57  
58  
59  
60

**Data sharing statement**

Data requested for public purposes or research transparency will be provided (please contact the corresponding author).

For peer review only

## REFERENCES

1. Savard J, Morin CM. Insomnia in the context of cancer: a review of a neglected problem. *J Clin Oncol* 2001;**19**(3):895-908.
2. Beck SL, Berger AM, Barsevick AM, et al. Sleep quality after initial chemotherapy for breast cancer. *Support Care Cancer* 2010;**18**(6):679-89.
3. Fiorentino L, Ancoli-Israel S. Sleep dysfunction in patients with cancer. *Curr Treat Options Neurol* 2007;**9**(5):337-46.
4. Lis CG, Gupta D, Grutsch JF. The relationship between insomnia and patient satisfaction with quality of life in cancer. *Support Care Cancer* 2008;**16**(3):261-6.
5. Bower JE, Ganz PA, Irwin MR, et al. Inflammation and behavioral symptoms after breast cancer treatment: do fatigue, depression, and sleep disturbance share a common underlying mechanism? *J Clin Oncol* 2011;**29**(26):3517-22.
6. Sharma N, Hansen CH, O'connor M, et al. Sleep problems in cancer patients: prevalence and association with distress and pain. *Psycho-Oncology* 2012;**21**(9):1003-9.
7. Jean-Pierre P, Grandner MA, Garland SN, et al. Self-reported memory problems in adult-onset cancer survivors: effects of cardiovascular disease and insomnia. *Sleep Med* 2015;**16**(7):845-9.
8. Payne J, Piper B, Rabinowitz I, et al. Biomarkers, fatigue, sleep, and depressive symptoms in women with breast cancer: a pilot study. *Oncol Nurs Forum* 2006;**33**(4):775-83.
9. Innominato PF, Focan C, Gorlia T, et al. Circadian rhythm in rest and activity: a biological correlate of quality of life and a predictor of survival in patients with metastatic colorectal cancer. *Cancer Res* 2009;**69**(11):4700-7.
10. Cash E, Sephton S, Chagpar A, et al. Circadian disruption and biomarkers of tumor progression in breast cancer patients awaiting surgery. *Brain Behav Immun* 2015;**48**:102-14.
11. Zhou ES, Partridge AH, Syrjala KL, et al. Evaluation and treatment of insomnia in adult cancer survivorship programs. *J Cancer Surviv* 2017;**11**(1):74-9.
12. Garland SN, Gehrman P, Barg FK, et al. CHOosing Options for Insomnia in Cancer Effectively (CHOICE): Design of a patient centered comparative effectiveness trial of acupuncture and cognitive behavior therapy for insomnia. *Contemp Clin Trials* 2016;**47**:349-55.
13. Moore TA, Berger AM, Dizona P. Sleep aid use during and following breast cancer adjuvant chemotherapy. *Psycho-Oncology* 2011;**20**(3):321-5.
14. Espie CA, MacMahon K, Kelly H, et al. Randomized clinical effectiveness trial of nurse-administered small-group cognitive behavior therapy for persistent insomnia in general practice. *Sleep* 2007;**30**(5):574.
15. Cao H, Pan X, Li H, et al. Acupuncture for treatment of insomnia: a systematic review of randomized controlled trials. *J Altern Complement Med* 2009;**15**(11):1171-86.

16. Cheuk DK, Yeung WF, Chung K, et al. Acupuncture for insomnia. *Cochrane Database Syst Rev* 2012;**12**(9):CD005472.
17. Shergis JL, Ni X, Jackson ML, et al. A systematic review of acupuncture for sleep quality in people with insomnia. *Complement Ther Med* 2016;**26**:11-20.
18. Garcia MK, Cohen L, Spano M, et al. Inpatient Acupuncture at a Major Cancer Center. *Integr Cancer Ther* 2016:1534735416685403.
19. Garland SN, Xie SX, Li Q, et al. Comparative effectiveness of electro-acupuncture versus gabapentin for sleep disturbances in breast cancer survivors with hot flashes: a randomized trial. *Menopause* 2016.
20. Choi TY, Kim JI, Lim HJ, et al. Acupuncture for Managing Cancer-Related Insomnia: A Systematic Review of Randomized Clinical Trials. *Integr Cancer Ther* 2016.
21. Krystal AD, Edinger JD. Measuring sleep quality. *Sleep Med* 2008;**9**:S10-7.
22. Lovin PA, Ehrenpreis AB. The role of polysomnography in the differential diagnosis of chronic insomnia. *Am J Psychiatry* 1988;**145**:346-9.
23. Sadeh A, Hauri PJ, Kripke DF, et al. The role of actigraphy in the evaluation of sleep disorders. *Sleep* 1995;**18**(4):288-302.
24. Zhang L, Zhao Z-X. Objective and subjective measures for sleep disorders. *Neurosci Bull* 2007;**23**(4):236-40.
25. Hachul H, Garcia TK, Maciel AL, et al. Acupuncture improves sleep in postmenopause in a randomized, double-blind, placebo-controlled study. *Climacteric* 2013;**16**(1):36-40.
26. Ruan JW, Wang CH, Liao XX, et al. Electroacupuncture treatment of chronic insomniacs. *Chin Med J* 2009;**122**(23):2869-73.
27. Spence DW, Kayumov L, Chen A, et al. Acupuncture increases nocturnal melatonin secretion and reduces insomnia and anxiety: a preliminary report. *J Neuropsychiatry Clin Neurosci* 2004;**16**(1):19-28.
28. Otte JL, Carpenter JS, Zhong X, et al. Feasibility study of acupuncture for reducing sleep disturbances and hot flashes in post-menopausal breast cancer survivors. *Clin Nurse Spec* 2011;**25**(5):228.
29. Yeung W-F, Chung K-F, Zhang S-P, et al. Electroacupuncture for primary insomnia: a randomized controlled trial. *Sleep* 2009;**32**(8):1039-47.
30. Hwang EH. Effects of hand acupuncture therapy on sleep quality in sleep disrupted adults: verification by polysomnography and cerebral blood flow test. *Taehan Kanho Hakhoe chi* 2007;**37**(7):1108-18.
31. Kaiser-Pagliarini T, Hachul H, Maciel A, et al. Acupuncture in insomnia and its consequences in postmenopausal women. *Sleep Med* 2009;**10**:S18.
32. Chung K, Yeung W, Zhang S, et al. Acupuncture for persistent insomnia associated with major depressive disorder: a randomised controlled trial. *Hong Kong Med J* 2016;**22**(Suppl2):S9-

- 1  
2  
3  
4  
5  
6  
7  
8  
9  
10  
11  
12  
13  
14  
15  
16  
17  
18  
19  
20  
21  
22  
23  
24  
25  
26  
27  
28  
29  
30  
31  
32  
33  
34  
35  
36  
37  
38  
39  
40  
41  
42  
43  
44  
45  
46  
47  
48  
49  
50  
51  
52  
53  
54  
55  
56  
57  
58  
59  
60
- 14.
33. Chung K-F, Yeung W-F, Yu Y-M, et al. Acupuncture for residual insomnia associated with major depressive disorder: a placebo-and sham-controlled, subject-and assessor-blind, randomized trial. *J Clin Psychiatry* 2015;**76**(6):e752-60.
34. Yeung W-F, Chung K-F, Tso K-C, et al. Electroacupuncture for residual insomnia associated with major depressive disorder: a randomized controlled trial. *Sleep* 2011;**34**(6):807-15.
35. Morin CM, Belleville G, Bédanger L, et al. The Insomnia Severity Index: psychometric indicators to detect insomnia cases and evaluate treatment response. *Sleep* 2011;**34**(5):601-8.
36. Cho YW, Song ML, Morin CM. Validation of a Korean version of the insomnia severity index. *J Clin Neurol* 2014;**10**(3):210-5.
37. Buysse DJ, Reynolds CF, Monk TH, et al. The Pittsburgh Sleep Quality Index: a new instrument for psychiatric practice and research. *Psychiatry Res* 1989;**28**(2):193-213.
38. Sohn SI, Kim DH, Lee MY, et al. The reliability and validity of the Korean version of the Pittsburgh Sleep Quality Index. *Sleep Breath* 2012;**16**(3):803-12.
39. Yellen SB, Cella DF, Webster K, et al. Measuring fatigue and other anemia-related symptoms with the Functional Assessment of Cancer Therapy (FACT) measurement system. *J Pain Symptom Manage* 1997;**13**(2):63-74.
40. Lee EH, Chun M, Kang S, et al. Validation of the Functional Assessment of Cancer Therapy-General (FACT-G) scale for measuring the health-related quality of life in Korean women with breast cancer. *Jpn J Clin Oncol* 2004;**34**(7):393-9.
41. Jeong JS, Ryu BH, Kim JS, et al. Bojungikki-tang for cancer-related fatigue: a pilot randomized clinical trial. *Integr Cancer Ther* 2010;**9**(4):331-8.
42. Arcuri GG, Palladini L, Dumas G, et al. Exploring the measurement properties of the Montreal Cognitive Assessment in a population of people with cancer. *Support Care Cancer* 2015;**23**(9):2779-87.
43. Lee JY, Dong Woo L, Cho SJ, et al. Brief screening for mild cognitive impairment in elderly outpatient clinic: validation of the Korean version of the Montreal Cognitive Assessment. *J Geriatr Psychiatry Neurol* 2008;**21**(2):104-10.
44. Huang W, Kutner N, Bliwise DL. Autonomic activation in insomnia: the case for acupuncture. *J Clin Sleep Med* 2011;**7**(1):95-102.
45. Zhao K. Acupuncture for the treatment of insomnia. *Int Rev Neurobiol* 2013;**111**:217-34.
46. Carney CE, Buysse DJ, Ancoli-Israel S, et al. The consensus sleep diary: standardizing prospective sleep self-monitoring. *Sleep* 2012;**35**(2):287-302.
47. Devilly GJ, Borkovec TD. Psychometric properties of the credibility/expectancy questionnaire. *J Behav Ther Exp Psychiatry* 2000;**31**(2):73-86.
48. US department of Health and Human Services. National Institutes of Health, National Cancer Institute: National Institutes of Health (2009) Common terminology criteria for adverse

- 1  
2  
3  
4 events (CTCAE) version 4.0. NIH Publication No. 03-5410.  
5 [https://evs.nci.nih.gov/ftp1/CTCAE/CTCAE\\_4.03\\_2010-06-14\\_QuickReference\\_5x7.pdf](https://evs.nci.nih.gov/ftp1/CTCAE/CTCAE_4.03_2010-06-14_QuickReference_5x7.pdf)  
6 (accessed 19 Jan 2017).  
7  
8  
9 49. Spilker B. *Quality of life and pharmacoeconomics in clinical trials*. 2nd ed. Philadelphia:  
10 Lippencott-Raven, 1995.  
11  
12 50. Julious SA. Sample size of 12 per group rule of thumb for a pilot study. *Pharm Stat*  
13 2005;**4**(4):287-91.  
14  
15 51. European Medicines Agency: ICH Topic E9. Statistical principles for clinical trials.  
16 [http://www.ema.europa.eu/docs/en\\_GB/document\\_library/Scientific\\_guideline/2009/09/WC5](http://www.ema.europa.eu/docs/en_GB/document_library/Scientific_guideline/2009/09/WC50002928.pdf)  
17 [00002928.pdf](http://www.ema.europa.eu/docs/en_GB/document_library/Scientific_guideline/2009/09/WC50002928.pdf) (accessed 19 Jan 2017).  
18  
19 52. Wiens BL. A fixed sequence Bonferroni procedure for testing multiple endpoints. *Pharm Stat*  
20 2003;**2**(3):211-5.  
21  
22 53. Ma Y, Dong M, Zhou K, et al. Publication Trends in Acupuncture Research: A 20-Year  
23 Bibliometric Analysis Based on PubMed. *PLoS One* 2016;**11**(12):e0168123.  
24  
25 54. Mao JJ, Farrar JT, Bruner D, et al. Electroacupuncture for fatigue, sleep, and psychological  
26 distress in breast cancer patients with aromatase inhibitor-related arthralgia: A randomized  
27 trial. *Cancer* 2014;**120**(23):3744-51.  
28  
29 55. Terasawa KT. *Kampo diagnosis of western medical doctor*. Seoul: Jipmundang, 1998.  
30  
31 56. Perlis ML, McCall WV, Jungquist CR, et al. Placebo effects in primary insomnia. *Sleep Med Rev*  
32 2005;**9**(5):381-9.  
33  
34 57. Kleinhenz J, Streitberger K, Windeler J, et al. Randomised clinical trial comparing the effects of  
35 acupuncture and a newly designed placebo needle in rotator cuff tendinitis. *Pain*  
36 1999;**83**(2):235-41.  
37  
38 58. Zhang CS, Tan HY, Zhang GS, et al. Placebo devices as effective control methods in  
39 acupuncture clinical trials: a systematic review. *PLoS One* 2015;**10**(11):e0140825.  
40  
41 59. Paterson C, Dieppe P. Characteristic and incidental (placebo) effects in complex interventions  
42 such as acupuncture. *BMJ* 2005;**330**(7501):1202.  
43  
44 60. Akimoto T, Nakahori C, Aizawa K, et al. Acupuncture and responses of immunologic and  
45 endocrine markers during competition. *Med Sci Sports Exerc* 2003;**35**(8):1296-302.  
46  
47 61. Liu S, Zhou W, Ruan X, et al. Activation of the hypothalamus characterizes the response to  
48 acupuncture stimulation in heroin addicts. *Neurosci Lett* 2007;**421**(3):203-8.  
49  
50  
51  
52  
53  
54  
55  
56  
57  
58  
59  
60

1  
2  
3  
4 **Table** (in the main text)  
5  
6

7 **Table 1** Schedule of enrolment, interventions, and assessments  
8  
9

10  
11 **Figure titles**  
12

13  
14 **Figure 1** Flow diagram of the study  
15

16  
17 **Figure 2** The points used for the electroacupuncture group  
18  
19

20  
21  
22 **Supplementary file**  
23

24  
25 **Supplementary File 1** Details of the electroacupuncture (EA) and sham EA treatment based  
26 on the Standards for Reporting Interventions in Clinical Trials of Acupuncture (STRICTA)  
27 checklist  
28  
29  
30  
31  
32  
33  
34  
35  
36  
37  
38  
39  
40  
41  
42  
43  
44  
45  
46  
47  
48  
49  
50  
51  
52  
53  
54  
55  
56  
57  
58  
59  
60

1  
2  
3  
4  
5  
6  
7  
8  
9  
10  
11  
12  
13  
14  
15  
16  
17  
18  
19  
20  
21  
22  
23  
24  
25  
26  
27  
28  
29  
30  
31  
32  
33  
34  
35  
36  
37  
38  
39  
40  
41  
42  
43  
44  
45  
46  
47  
48  
49  
50  
51  
52  
53  
54  
55  
56  
57  
58  
59  
60

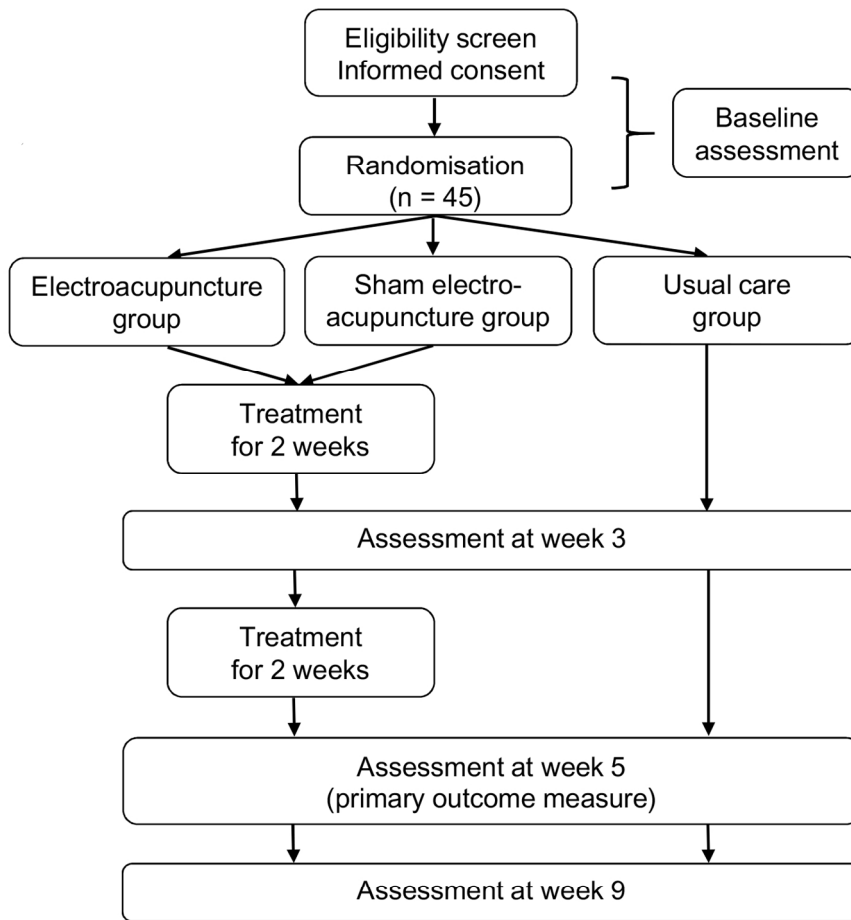

Figure 1 Flow diagram of the study

137x141mm (300 x 300 DPI)

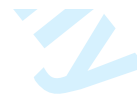

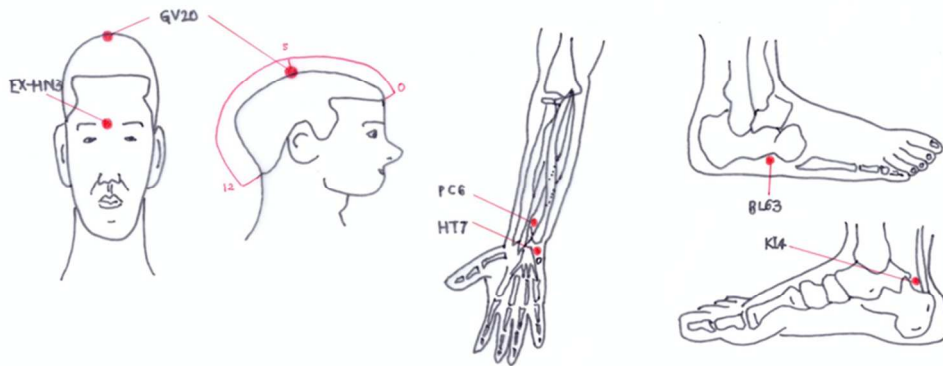

Figure 2 The points used for the electroacupuncture group

73x31mm (300 x 300 DPI)

Peer review only

1  
2  
3  
4  
5  
6  
7  
8  
9  
10  
11  
12  
13  
14  
15  
16  
17  
18  
19  
20  
21  
22  
23  
24  
25  
26  
27  
28  
29  
30  
31  
32  
33  
34  
35  
36  
37  
38  
39  
40  
41  
42  
43  
44  
45  
46  
47  
48  
49  
50  
51  
52  
53  
54  
55  
56  
57  
58  
59  
60



**Supplementary file 1** Details of the electroacupuncture (EA) and sham EA treatments based on the Standards for Reporting Interventions in Clinical Trials of Acupuncture (STRICTA) checklist

| Item                                          | Detail                                                                                                                                               | Description                                                                                                                                                                                                                                                                                                                                                                                                                                                                                                                                                                                                               |
|-----------------------------------------------|------------------------------------------------------------------------------------------------------------------------------------------------------|---------------------------------------------------------------------------------------------------------------------------------------------------------------------------------------------------------------------------------------------------------------------------------------------------------------------------------------------------------------------------------------------------------------------------------------------------------------------------------------------------------------------------------------------------------------------------------------------------------------------------|
| <b>1. Acupuncture rationale</b>               | 1a) Style of acupuncture                                                                                                                             | Electroacupuncture based on traditional Korean acupuncture                                                                                                                                                                                                                                                                                                                                                                                                                                                                                                                                                                |
|                                               | 1b) Reasoning for treatment provided, based on historical context, literature sources, and/or consensus methods, with references where appropriate   | Related papers <sup>15-20,25-29,31-34</sup> and expert (doctors of Korean medicine) consensus                                                                                                                                                                                                                                                                                                                                                                                                                                                                                                                             |
|                                               | 1c) Extent to which treatment was varied                                                                                                             | Standardized treatment (option: up to 2 bilateral acupoints can be added according to the chief complaints of the participants)                                                                                                                                                                                                                                                                                                                                                                                                                                                                                           |
| <b>2. Details of needling</b>                 | 2a) Number of needle insertions per subject per session                                                                                              | Standardized regimen: 10 (10 to 14, when considering addition of optional acupoints)                                                                                                                                                                                                                                                                                                                                                                                                                                                                                                                                      |
|                                               | 2b) Names of points used                                                                                                                             | GV 20, EX-HN-3, bilateral HT7, PC6, BL63, KI4                                                                                                                                                                                                                                                                                                                                                                                                                                                                                                                                                                             |
|                                               | 2c) Depth of insertion, based on a specified unit of measurement, or on a particular tissue level                                                    | 0.6 – 4.5 cm                                                                                                                                                                                                                                                                                                                                                                                                                                                                                                                                                                                                              |
|                                               | 2d) Response sought                                                                                                                                  | Acupuncture: <i>de qi</i> (sense of soreness, numbness, heaviness, or distension)<br>EA: cognition of stimulation and comfortable feeling                                                                                                                                                                                                                                                                                                                                                                                                                                                                                 |
|                                               | 2e) Needle stimulation                                                                                                                               | Manual stimulation: twisting-needling 3-5 times<br>Electrical stimulation: 4 Hz                                                                                                                                                                                                                                                                                                                                                                                                                                                                                                                                           |
|                                               | 2f) Needle retention time                                                                                                                            | 30 minutes                                                                                                                                                                                                                                                                                                                                                                                                                                                                                                                                                                                                                |
|                                               | 2g) Needle type (diameter, length, and manufacturer or material)                                                                                     | Acupuncture (diameter: 0.25 mm, length: 25 mm, manufacturer: Asiamed GmbH & Co., material: sterilized stainless steel)                                                                                                                                                                                                                                                                                                                                                                                                                                                                                                    |
| <b>3. Treatment regimen</b>                   | 3a) Number of treatment sessions                                                                                                                     | 10                                                                                                                                                                                                                                                                                                                                                                                                                                                                                                                                                                                                                        |
|                                               | 3b) Frequency and duration of treatment sessions                                                                                                     | 10 sessions for 4 weeks (average 2.5 times per week)                                                                                                                                                                                                                                                                                                                                                                                                                                                                                                                                                                      |
| <b>4. Other components of treatment</b>       | 4a) Details of other interventions administered to the acupuncture group                                                                             | <ul style="list-style-type: none"> <li>- All the three groups will be educated with a brochure about the management of sleep disorder</li> <li>- No additional Korean traditional medical treatment regarding insomnia is allowed except for what is given for the study</li> <li>- The interventions other than Korean traditional medical treatment to manage insomnia that have been steadily received for more than 4 weeks before the screening visit are allowed to continue during the study, but no additional treatment is allowed after the beginning of the trial (even sleeping pills are allowed)</li> </ul> |
|                                               | 4b) Setting and context of treatment, including instructions to practitioners, and information and explanations to patients                          | <ul style="list-style-type: none"> <li>- Setting: clinical trial centers in university hospitals</li> <li>- Unnecessary conversation will be limited between the acupuncturists and patients during the treatment.</li> </ul>                                                                                                                                                                                                                                                                                                                                                                                             |
| <b>5. Practitioner background</b>             | 5) Description of participating acupuncturists (qualification or professional affiliation, years in acupuncture practice, other relevant experience) | Licensed Korean medical doctors with at least 2 years of clinical experience                                                                                                                                                                                                                                                                                                                                                                                                                                                                                                                                              |
| <b>6. Control or comparator interventions</b> | 6a) Rationale for the control or comparator in the context of the research question, with sources that justify this choice                           | <p>Sham acupuncture: previous researches validating the nonpenetrating sham acupuncture device, Streitberger acupuncture needle<sup>52</sup></p> <p>Mock electroacupuncture: previous researches with control intervention with no electrical stimulation with beeping sound and lighting<sup>29,32-34,49</sup></p>                                                                                                                                                                                                                                                                                                       |

1  
2  
3  
4  
5  
6  
7  
8  
9  
10  
11  
12  
13  
14  
15  
16  
17  
18  
19  
20  
21  
22  
23  
24  
25  
26  
27  
28  
29  
30  
31  
32  
33  
34  
35  
36  
37  
38  
39  
40  
41  
42  
43  
44  
45  
46  
47  
48  
49  
50  
51  
52  
53  
54  
55  
56  
57  
58  
59  
60

|  |                                                                                                                                                                                    |                                                                                                                                                                                                                                                                                                                                                                                                                                                                                                                                                                                                                                                                                                                                                                                                                                                                                                                                                                            |
|--|------------------------------------------------------------------------------------------------------------------------------------------------------------------------------------|----------------------------------------------------------------------------------------------------------------------------------------------------------------------------------------------------------------------------------------------------------------------------------------------------------------------------------------------------------------------------------------------------------------------------------------------------------------------------------------------------------------------------------------------------------------------------------------------------------------------------------------------------------------------------------------------------------------------------------------------------------------------------------------------------------------------------------------------------------------------------------------------------------------------------------------------------------------------------|
|  | <p>6b) Precise description of the control or comparator. If sham acupuncture or any other type of acupuncture-like control is used, provide details as for Items 1 to 3 above.</p> | <p>1. rationale of sham acupuncture<br/>Use non-penetrating Streitberger acupuncture needles at 10 non-acupoints and connect electrostimulator in switch-off state on to the needles</p> <p>2. points used for sham EA</p> <ul style="list-style-type: none"> <li>- Upper limb 1: 1 cm lateral and 5 cm proximal points from cubital creases of bilateral arms</li> <li>- Upper limb 2: 2 cm above the upper limb 1 point</li> <li>- Lower limb 1: 1.5 cm above the depression at the midpoint of the upper border of the bilateral patella</li> <li>- Lower limb 2: area 1/3 above the medial part of the bilateral tibia</li> <li>- Lower limb 3: 1.5 cm above the lower limb 2 point</li> </ul> <p>3. number of needle insertions per subject per session: 10</p> <p>4. needle type<br/>Sham acupuncture (Streitberger needle, Asiamed GmbH &amp; Co., sterilized stainless steel)</p> <p>5. Treatment duration, frequency, period: the same as the treatment group</p> |
|--|------------------------------------------------------------------------------------------------------------------------------------------------------------------------------------|----------------------------------------------------------------------------------------------------------------------------------------------------------------------------------------------------------------------------------------------------------------------------------------------------------------------------------------------------------------------------------------------------------------------------------------------------------------------------------------------------------------------------------------------------------------------------------------------------------------------------------------------------------------------------------------------------------------------------------------------------------------------------------------------------------------------------------------------------------------------------------------------------------------------------------------------------------------------------|

For peer review only

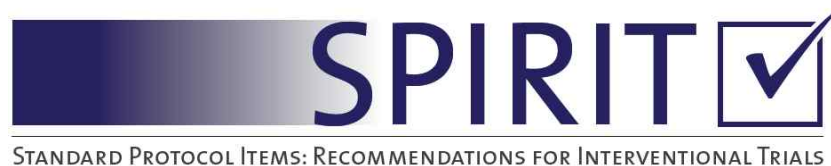

SPIRIT 2013 Checklist: Recommended items to address in a clinical trial protocol and related documents\*

| Section/item                      | Item No | Description                                                                                                                                                                                                                                                                              | Addressed on page number         |
|-----------------------------------|---------|------------------------------------------------------------------------------------------------------------------------------------------------------------------------------------------------------------------------------------------------------------------------------------------|----------------------------------|
| <b>Administrative information</b> |         |                                                                                                                                                                                                                                                                                          |                                  |
| Title                             | 1       | Descriptive title identifying the study design, population, interventions, and, if applicable, trial acronym                                                                                                                                                                             | ___title page___                 |
| Trial registration                | 2a      | Trial identifier and registry name. If not yet registered, name of intended registry                                                                                                                                                                                                     | _at the end of the abstract_____ |
|                                   | 2b      | All items from the World Health Organization Trial Registration Data Set                                                                                                                                                                                                                 | _____ - _____                    |
| Protocol version                  | 3       | Date and version identifier                                                                                                                                                                                                                                                              | _____ - _____                    |
| Funding                           | 4       | Sources and types of financial, material, and other support                                                                                                                                                                                                                              | _____24_____                     |
| Roles and responsibilities        | 5a      | Names, affiliations, and roles of protocol contributors                                                                                                                                                                                                                                  | _____24_____                     |
|                                   | 5b      | Name and contact information for the trial sponsor                                                                                                                                                                                                                                       | _____ - _____                    |
|                                   | 5c      | Role of study sponsor and funders, if any, in study design; collection, management, analysis, and interpretation of data; writing of the report; and the decision to submit the report for publication, including whether they will have ultimate authority over any of these activities | _____ - _____                    |
|                                   | 5d      | Composition, roles, and responsibilities of the coordinating centre, steering committee, endpoint adjudication committee, data management team, and other individuals or groups overseeing the trial, if applicable (see Item 21a for data monitoring committee)                         | _____ - _____                    |

1 **Introduction**

2

3 Background and rationale 6a Description of research question and justification for undertaking the trial, including summary of relevant studies (published and unpublished) examining benefits and harms for each intervention \_\_\_\_\_ 5-7 \_\_\_\_\_

4

5

6

7 6b Explanation for choice of comparators \_\_\_\_\_ 12-13 \_\_\_\_\_

8 Objectives 7 Specific objectives or hypotheses \_\_\_\_\_ 7,19 \_\_\_\_\_

9

10 Trial design 8 Description of trial design including type of trial (eg, parallel group, crossover, factorial, single group), allocation ratio, and framework (eg, superiority, equivalence, noninferiority, exploratory) \_\_\_\_\_ 8 \_\_\_\_\_

11

12

13

14

15 **Methods: Participants, interventions, and outcomes**

16

17 Study setting 9 Description of study settings (eg, community clinic, academic hospital) and list of countries where data will be collected. Reference to where list of study sites can be obtained \_\_\_\_\_ 9 \_\_\_\_\_

18

19 Eligibility criteria 10 Inclusion and exclusion criteria for participants. If applicable, eligibility criteria for study centres and individuals who will perform the interventions (eg, surgeons, psychotherapists) \_\_\_\_\_ 9-11, 17 \_\_\_\_\_

20

21

22

23 Interventions 11a Interventions for each group with sufficient detail to allow replication, including how and when they will be administered \_\_\_\_\_ 12-13 \_\_\_\_\_

24

25

26 11b Criteria for discontinuing or modifying allocated interventions for a given trial participant (eg, drug dose change in response to harms, participant request, or improving/worsening disease) \_\_\_\_\_ 13-14 \_\_\_\_\_

27

28 11c Strategies to improve adherence to intervention protocols, and any procedures for monitoring adherence (eg, drug tablet return, laboratory tests) \_\_\_\_\_ - \_\_\_\_\_

29

30 11d Relevant concomitant care and interventions that are permitted or prohibited during the trial \_\_\_\_\_ 13-14 \_\_\_\_\_

31

32

33 Outcomes 12 Primary, secondary, and other outcomes, including the specific measurement variable (eg, systolic blood pressure), analysis metric (eg, change from baseline, final value, time to event), method of aggregation (eg, median, proportion), and time point for each outcome. Explanation of the clinical relevance of chosen efficacy and harm outcomes is strongly recommended \_\_\_\_\_ 14-16 \_\_\_\_\_

34

35

36

37

38

39

40

41 Participant timeline 13 Time schedule of enrolment, interventions (including any run-ins and washouts), assessments, and visits for 8, table 1, figure 1 participants. A schematic diagram is highly recommended (see Figure)

42

43

44

45

46

47

|    |                                                                     |     |                                                                                                                                                                                                                                                                                                                                                                                                              |               |
|----|---------------------------------------------------------------------|-----|--------------------------------------------------------------------------------------------------------------------------------------------------------------------------------------------------------------------------------------------------------------------------------------------------------------------------------------------------------------------------------------------------------------|---------------|
| 1  | Sample size                                                         | 14  | Estimated number of participants needed to achieve study objectives and how it was determined, including clinical and statistical assumptions supporting any sample size calculations                                                                                                                                                                                                                        | ___ 17-18 ___ |
| 2  |                                                                     |     |                                                                                                                                                                                                                                                                                                                                                                                                              |               |
| 3  |                                                                     |     |                                                                                                                                                                                                                                                                                                                                                                                                              |               |
| 4  | Recruitment                                                         | 15  | Strategies for achieving adequate participant enrolment to reach target sample size                                                                                                                                                                                                                                                                                                                          | ___ 9 ___     |
| 5  |                                                                     |     |                                                                                                                                                                                                                                                                                                                                                                                                              |               |
| 6  |                                                                     |     |                                                                                                                                                                                                                                                                                                                                                                                                              |               |
| 7  | <b>Methods: Assignment of interventions (for controlled trials)</b> |     |                                                                                                                                                                                                                                                                                                                                                                                                              |               |
| 8  |                                                                     |     |                                                                                                                                                                                                                                                                                                                                                                                                              |               |
| 9  | Allocation:                                                         |     |                                                                                                                                                                                                                                                                                                                                                                                                              |               |
| 10 |                                                                     |     |                                                                                                                                                                                                                                                                                                                                                                                                              |               |
| 11 | Sequence generation                                                 | 16a | Method of generating the allocation sequence (eg, computer-generated random numbers), and list of any factors for stratification. To reduce predictability of a random sequence, details of any planned restriction (eg, blocking) should be provided in a separate document that is unavailable to those who enrol participants or assign interventions                                                     | ___ 11 ___    |
| 12 |                                                                     |     |                                                                                                                                                                                                                                                                                                                                                                                                              | —             |
| 13 |                                                                     |     |                                                                                                                                                                                                                                                                                                                                                                                                              |               |
| 14 |                                                                     |     |                                                                                                                                                                                                                                                                                                                                                                                                              |               |
| 15 |                                                                     |     |                                                                                                                                                                                                                                                                                                                                                                                                              |               |
| 16 | Allocation concealment mechanism                                    | 16b | Mechanism of implementing the allocation sequence (eg, central telephone; sequentially numbered, opaque, sealed envelopes), describing any steps to conceal the sequence until interventions are assigned                                                                                                                                                                                                    | ___ 11 ___    |
| 17 |                                                                     |     |                                                                                                                                                                                                                                                                                                                                                                                                              | —             |
| 18 |                                                                     |     |                                                                                                                                                                                                                                                                                                                                                                                                              |               |
| 19 |                                                                     |     |                                                                                                                                                                                                                                                                                                                                                                                                              |               |
| 20 |                                                                     |     |                                                                                                                                                                                                                                                                                                                                                                                                              |               |
| 21 | Implementation                                                      | 16c | Who will generate the allocation sequence, who will enrol participants, and who will assign participants to interventions                                                                                                                                                                                                                                                                                    | ___ 11 ___    |
| 22 |                                                                     |     |                                                                                                                                                                                                                                                                                                                                                                                                              | —             |
| 23 |                                                                     |     |                                                                                                                                                                                                                                                                                                                                                                                                              |               |
| 24 | Blinding (masking)                                                  | 17a | Who will be blinded after assignment to interventions (eg, trial participants, care providers, outcome assessors, data analysts), and how                                                                                                                                                                                                                                                                    | ___ 11-12 ___ |
| 25 |                                                                     |     |                                                                                                                                                                                                                                                                                                                                                                                                              |               |
| 26 |                                                                     |     |                                                                                                                                                                                                                                                                                                                                                                                                              |               |
| 27 |                                                                     |     |                                                                                                                                                                                                                                                                                                                                                                                                              |               |
| 28 |                                                                     | 17b | If blinded, circumstances under which unblinding is permissible, and procedure for revealing a participant's allocated intervention during the trial                                                                                                                                                                                                                                                         | ___ - ___     |
| 29 |                                                                     |     |                                                                                                                                                                                                                                                                                                                                                                                                              |               |
| 30 |                                                                     |     |                                                                                                                                                                                                                                                                                                                                                                                                              |               |
| 31 |                                                                     |     |                                                                                                                                                                                                                                                                                                                                                                                                              |               |
| 32 | <b>Methods: Data collection, management, and analysis</b>           |     |                                                                                                                                                                                                                                                                                                                                                                                                              |               |
| 33 |                                                                     |     |                                                                                                                                                                                                                                                                                                                                                                                                              |               |
| 34 | Data collection methods                                             | 18a | Plans for assessment and collection of outcome, baseline, and other trial data, including any related processes to promote data quality (eg, duplicate measurements, training of assessors) and a description of study instruments (eg, questionnaires, laboratory tests) along with their reliability and validity, if known. Reference to where data collection forms can be found, if not in the protocol | ___ 14-17 ___ |
| 35 |                                                                     |     |                                                                                                                                                                                                                                                                                                                                                                                                              |               |
| 36 |                                                                     |     |                                                                                                                                                                                                                                                                                                                                                                                                              |               |
| 37 |                                                                     |     |                                                                                                                                                                                                                                                                                                                                                                                                              |               |
| 38 |                                                                     |     |                                                                                                                                                                                                                                                                                                                                                                                                              |               |
| 39 |                                                                     |     |                                                                                                                                                                                                                                                                                                                                                                                                              |               |
| 40 |                                                                     | 18b | Plans to promote participant retention and complete follow-up, including list of any outcome data to be collected for participants who discontinue or deviate from intervention protocols                                                                                                                                                                                                                    | ___ 17 ___    |
| 41 |                                                                     |     |                                                                                                                                                                                                                                                                                                                                                                                                              |               |
| 42 |                                                                     |     |                                                                                                                                                                                                                                                                                                                                                                                                              |               |
| 43 |                                                                     |     |                                                                                                                                                                                                                                                                                                                                                                                                              |               |
| 44 |                                                                     |     |                                                                                                                                                                                                                                                                                                                                                                                                              |               |
| 45 |                                                                     |     |                                                                                                                                                                                                                                                                                                                                                                                                              |               |
| 46 |                                                                     |     |                                                                                                                                                                                                                                                                                                                                                                                                              |               |
| 47 |                                                                     |     |                                                                                                                                                                                                                                                                                                                                                                                                              |               |

|    |                                 |     |                                                                                                                                                                                                                                                                                                                                       |                  |
|----|---------------------------------|-----|---------------------------------------------------------------------------------------------------------------------------------------------------------------------------------------------------------------------------------------------------------------------------------------------------------------------------------------|------------------|
| 1  | Data management                 | 19  | Plans for data entry, coding, security, and storage, including any related processes to promote data quality (eg, double data entry; range checks for data values). Reference to where details of data management procedures can be found, if not in the protocol                                                                     | _____17__        |
| 2  |                                 |     |                                                                                                                                                                                                                                                                                                                                       |                  |
| 3  |                                 |     |                                                                                                                                                                                                                                                                                                                                       |                  |
| 4  |                                 |     |                                                                                                                                                                                                                                                                                                                                       |                  |
| 5  | Statistical methods             | 20a | Statistical methods for analysing primary and secondary outcomes. Reference to where other details of the statistical analysis plan can be found, if not in the protocol                                                                                                                                                              | _____18-19__     |
| 6  |                                 |     |                                                                                                                                                                                                                                                                                                                                       |                  |
| 7  |                                 |     |                                                                                                                                                                                                                                                                                                                                       |                  |
| 8  |                                 | 20b | Methods for any additional analyses (eg, subgroup and adjusted analyses)                                                                                                                                                                                                                                                              | _____20__        |
| 9  |                                 |     |                                                                                                                                                                                                                                                                                                                                       |                  |
| 10 |                                 | 20c | Definition of analysis population relating to protocol non-adherence (eg, as randomised analysis), and any statistical methods to handle missing data (eg, multiple imputation)                                                                                                                                                       | _____13-14, 18__ |
| 11 |                                 |     |                                                                                                                                                                                                                                                                                                                                       |                  |
| 12 |                                 |     |                                                                                                                                                                                                                                                                                                                                       |                  |
| 13 |                                 |     |                                                                                                                                                                                                                                                                                                                                       |                  |
| 14 |                                 |     |                                                                                                                                                                                                                                                                                                                                       |                  |
| 15 | <b>Methods: Monitoring</b>      |     |                                                                                                                                                                                                                                                                                                                                       |                  |
| 16 |                                 |     |                                                                                                                                                                                                                                                                                                                                       |                  |
| 17 | Data monitoring                 | 21a | Composition of data monitoring committee (DMC); summary of its role and reporting structure; statement of whether it is independent from the sponsor and competing interests; and reference to where further details about its charter can be found, if not in the protocol. Alternatively, an explanation of why a DMC is not needed | _____ - _____    |
| 18 |                                 |     |                                                                                                                                                                                                                                                                                                                                       |                  |
| 19 |                                 |     |                                                                                                                                                                                                                                                                                                                                       |                  |
| 20 |                                 |     |                                                                                                                                                                                                                                                                                                                                       |                  |
| 21 |                                 |     |                                                                                                                                                                                                                                                                                                                                       |                  |
| 22 |                                 | 21b | Description of any interim analyses and stopping guidelines, including who will have access to these interim results and make the final decision to terminate the trial                                                                                                                                                               | _____ - _____    |
| 23 |                                 |     |                                                                                                                                                                                                                                                                                                                                       |                  |
| 24 |                                 |     |                                                                                                                                                                                                                                                                                                                                       |                  |
| 25 |                                 |     |                                                                                                                                                                                                                                                                                                                                       |                  |
| 26 | Harms                           | 22  | Plans for collecting, assessing, reporting, and managing solicited and spontaneously reported adverse events and other unintended effects of trial interventions or trial conduct                                                                                                                                                     | _____16-17__     |
| 27 |                                 |     |                                                                                                                                                                                                                                                                                                                                       |                  |
| 28 |                                 |     |                                                                                                                                                                                                                                                                                                                                       |                  |
| 29 | Auditing                        | 23  | Frequency and procedures for auditing trial conduct, if any, and whether the process will be independent from investigators and the sponsor                                                                                                                                                                                           | _____ - _____    |
| 30 |                                 |     |                                                                                                                                                                                                                                                                                                                                       |                  |
| 31 |                                 |     |                                                                                                                                                                                                                                                                                                                                       |                  |
| 32 |                                 |     |                                                                                                                                                                                                                                                                                                                                       |                  |
| 33 | <b>Ethics and dissemination</b> |     |                                                                                                                                                                                                                                                                                                                                       |                  |
| 34 |                                 |     |                                                                                                                                                                                                                                                                                                                                       |                  |
| 35 | Research ethics approval        | 24  | Plans for seeking research ethics committee/institutional review board (REC/IRB) approval                                                                                                                                                                                                                                             | _____20__        |
| 36 |                                 |     |                                                                                                                                                                                                                                                                                                                                       |                  |
| 37 |                                 |     |                                                                                                                                                                                                                                                                                                                                       |                  |
| 38 | Protocol amendments             | 25  | Plans for communicating important protocol modifications (eg, changes to eligibility criteria, outcomes, analyses) to relevant parties (eg, investigators, REC/IRBs, trial participants, trial registries, journals, regulators)                                                                                                      | _____20__        |
| 39 |                                 |     |                                                                                                                                                                                                                                                                                                                                       |                  |
| 40 |                                 |     |                                                                                                                                                                                                                                                                                                                                       |                  |
| 41 |                                 |     |                                                                                                                                                                                                                                                                                                                                       |                  |
| 42 |                                 |     |                                                                                                                                                                                                                                                                                                                                       |                  |
| 43 |                                 |     |                                                                                                                                                                                                                                                                                                                                       |                  |
| 44 |                                 |     |                                                                                                                                                                                                                                                                                                                                       |                  |
| 45 |                                 |     |                                                                                                                                                                                                                                                                                                                                       |                  |
| 46 |                                 |     |                                                                                                                                                                                                                                                                                                                                       |                  |
| 47 |                                 |     |                                                                                                                                                                                                                                                                                                                                       |                  |

|    |                               |     |                                                                                                                                                                                                                                                                                     |               |
|----|-------------------------------|-----|-------------------------------------------------------------------------------------------------------------------------------------------------------------------------------------------------------------------------------------------------------------------------------------|---------------|
| 1  | Consent or assent             | 26a | Who will obtain informed consent or assent from potential trial participants or authorised surrogates, and how (see Item 32)                                                                                                                                                        | _____20_____  |
| 2  |                               |     |                                                                                                                                                                                                                                                                                     |               |
| 3  |                               |     |                                                                                                                                                                                                                                                                                     |               |
| 4  |                               | 26b | Additional consent provisions for collection and use of participant data and biological specimens in ancillary studies, if applicable                                                                                                                                               | _____ - _____ |
| 5  |                               |     |                                                                                                                                                                                                                                                                                     |               |
| 6  |                               |     |                                                                                                                                                                                                                                                                                     |               |
| 7  | Confidentiality               | 27  | How personal information about potential and enrolled participants will be collected, shared, and maintained in order to protect confidentiality before, during, and after the trial                                                                                                | _____ - _____ |
| 8  |                               |     |                                                                                                                                                                                                                                                                                     |               |
| 9  |                               |     |                                                                                                                                                                                                                                                                                     |               |
| 10 | Declaration of interests      | 28  | Financial and other competing interests for principal investigators for the overall trial and each study site                                                                                                                                                                       | _____24_____  |
| 11 |                               |     |                                                                                                                                                                                                                                                                                     |               |
| 12 |                               |     |                                                                                                                                                                                                                                                                                     |               |
| 13 |                               |     |                                                                                                                                                                                                                                                                                     |               |
| 14 | Access to data                | 29  | Statement of who will have access to the final trial dataset, and disclosure of contractual agreements that limit such access for investigators                                                                                                                                     | _____ - _____ |
| 15 |                               |     |                                                                                                                                                                                                                                                                                     |               |
| 16 |                               |     |                                                                                                                                                                                                                                                                                     |               |
| 17 | Ancillary and post-trial care | 30  | Provisions, if any, for ancillary and post-trial care, and for compensation to those who suffer harm from trial participation                                                                                                                                                       | _____ - _____ |
| 18 |                               |     |                                                                                                                                                                                                                                                                                     |               |
| 19 |                               |     |                                                                                                                                                                                                                                                                                     |               |
| 20 | Dissemination policy          | 31a | Plans for investigators and sponsor to communicate trial results to participants, healthcare professionals, the public, and other relevant groups (eg, via publication, reporting in results databases, or other data sharing arrangements), including any publication restrictions | _____20_____  |
| 21 |                               |     |                                                                                                                                                                                                                                                                                     |               |
| 22 |                               |     |                                                                                                                                                                                                                                                                                     |               |
| 23 |                               |     |                                                                                                                                                                                                                                                                                     |               |
| 24 |                               |     |                                                                                                                                                                                                                                                                                     |               |
| 25 |                               | 31b | Authorship eligibility guidelines and any intended use of professional writers                                                                                                                                                                                                      | _____ - _____ |
| 26 |                               |     |                                                                                                                                                                                                                                                                                     |               |
| 27 |                               | 31c | Plans, if any, for granting public access to the full protocol, participant-level dataset, and statistical code                                                                                                                                                                     | _____ - _____ |
| 28 |                               |     |                                                                                                                                                                                                                                                                                     |               |
| 29 |                               |     |                                                                                                                                                                                                                                                                                     |               |
| 30 | <b>Appendices</b>             |     |                                                                                                                                                                                                                                                                                     |               |
| 31 |                               |     |                                                                                                                                                                                                                                                                                     |               |
| 32 | Informed consent materials    | 32  | Model consent form and other related documentation given to participants and authorised surrogates                                                                                                                                                                                  | _____ - _____ |
| 33 |                               |     |                                                                                                                                                                                                                                                                                     |               |
| 34 |                               |     |                                                                                                                                                                                                                                                                                     |               |
| 35 | Biological specimens          | 33  | Plans for collection, laboratory evaluation, and storage of biological specimens for genetic or molecular analysis in the current trial and for future use in ancillary studies, if applicable                                                                                      | _____ - _____ |
| 36 |                               |     |                                                                                                                                                                                                                                                                                     |               |
| 37 |                               |     |                                                                                                                                                                                                                                                                                     |               |

38 \*It is strongly recommended that this checklist be read in conjunction with the SPIRIT 2013 Explanation & Elaboration for important clarification on the items.  
 39 Amendments to the protocol should be tracked and dated. The SPIRIT checklist is copyrighted by the SPIRIT Group under the Creative Commons  
 40 "[Attribution-NonCommercial-NoDerivs 3.0 Unported](https://creativecommons.org/licenses/by-nc-nd/3.0/)" license.  
 41  
 42  
 43  
 44
